# Supplementary material for: Hnrnpul1 controls transcription, splicing, and modulates skeletal and limb development in vivo
Source: PubMed Central journal article supplement (PMC9073674; doi:10.1093/g3journal/jkac067), 2022-03-23
Supplement: jkac067_supplementary_table_s1.pdf [file jkac067_supplementary_table_s1.pdf]

Blackwell et al., Table S1: AS events

| Gene Name         | Gene ID             | EVENT         | Affected exon/intron | COORD                                | LENGTH | FullCO                                                                | COMPLEX | hmrnp1/11 | mutant average | DKO1  | DKO2  | DKO3  | WT average  | WT1   | WT2   | WT3   | dPSI   |
|-------------------|---------------------|---------------|----------------------|--------------------------------------|--------|-----------------------------------------------------------------------|---------|-----------|----------------|-------|-------|-------|-------------|-------|-------|-------|--------|
| hmrnp11           | ENSADRG0000079780   | DreEX0005068  |                      | 13 chr5:61150155-61150323            | 169    | chr5:61144632,61150155-61150323,61151040                              | S       |           | 0              | 0     | 0     | 0     | 95.86666667 | 100   | 100   | 87.6  | -95.87 |
| mar4              | ENSADRG0000024966   | DreEX00050820 |                      | 16 chr15:23694785-23694867           | 83     | chr15:23692386,23694785-23694867,23702150+23702158                    | S       |           | 32.18666667    | 28.64 | 0     | 67.92 | 90.5        | 100   | 77.95 | 93.55 | -58.31 |
| ubn2b             | ENSADRG00000100508  | DreEX00082949 |                      | 14 chr3:7954681-7954749              | 69     | chr3:7961187,7954681-7954749,7954555                                  | S       |           | 28.07          | 0     | 44.68 | 39.53 | 79.43       | 100   | 58.06 | 80.23 | -51.36 |
| slc25a20          | ENSADRG00000040401  | DreEX00072778 |                      | 8 chr2:135530-135654                 | 125    | chr2:135395,135530-135654,136237                                      | S       |           | 55.31666667    | 83.7  | 0     | 82.25 | 100         | 100   | 100   | 100   | -44.68 |
| ap2m1a            | ENSADRG00000002790  | DreEX0014240  |                      | 8 chr2:10033782-10003567             | 15     | chr2:10033782,10003567-10003567,9999392+9999407                       | MIC     |           | 18.32          | 23.84 | 0     | 31.12 | 60.09       | 75.66 | 65.75 | 38.86 | -41.77 |
| mprp1             | ENSADRG00000102081  | DreEX0047254  |                      | intron 15-16 chr12:501924-504059     | 2136   | chr12:498740,501924-504059,509803                                     | S       |           | 5.69           | 17.07 | 0     | 0     | 46.49333333 | 42.31 | 52.17 | 45    | -40.8  |
| snap25b           | ENSADRG0000058117   | DreEX0074047  |                      | chr17:12162810-12162924              | 115    | chr17:12169135,12162810-12162924,12152958                             | C3      |           | 20.21          | 25.68 | 0     | 34.95 | 60.94       | 70.67 | 54.79 | 57.36 | -40.73 |
| bsg               | ENSADRG0000019881   | DreEX0017472  |                      | 2 chr22:18908465-18908815            | 351    | chr22:18904664,18908465-18908815,18910027                             | S       |           | 2.48           | 3.88  | 0     | 3.56  | 35.37666667 | 64.71 | 28.34 | 13.08 | -32.9  |
| ears2             | ENSADRG00000103099  | DreEX0003830  |                      | 4 chr1:58451484-58451614             | 131    | chr1:58455497,58451484-58451614,58446902+58446961                     | C3      |           | 63.12333333    | 58.67 | 55.7  | 75    | 89.14       | 86.6  | 100   | 80.82 | -26.02 |
| hm13              | ENSADRG00000037846  | DreEX0037727  |                      | intron 11-12 chr23:469529-469718     | 190    | chr23:471555,469529-469718,468377                                     | S       |           | 26.35333333    | 5.86  | 1.22  | 5.77  | 28.88666667 | 14.98 | 47.76 | 23.92 | -24.61 |
| cdc14b            | ENSADRG0000021483   | DreEX0020101  |                      | 1 chr8:1156996-1157061               | 66     | chr8:1164574,1156996-1157061,1156873                                  | C1      |           | 26.35333333    | 25.56 | 25.59 | 27.91 | 45.77666667 | 53.51 | 49.49 | 34.33 | -19.43 |
| si:ch211-266g1.10 | ENSADRG0000057903   | DreEX0068102  |                      | intron 24-25 chr17:15466314-15466358 | 45     | chr17:15466527,15466314-15466358,15466096+15466099                    | C1      |           | 0              | 0     | 0     | 0     | 17.14333333 | 24.35 | 15.04 | 12.04 | -17.14 |
| neb               | ENSADRG00000032630  | DreEX0050008  |                      | 121 chr9:23016894-23016998           | 105    | chr9:23019453,23016894-23016998,23016992                              | S       |           | 0              | 0     | 0     | 0     | 13.61666667 | 24.45 | 7.69  | 8.71  | -13.62 |
| frg1              | ENSADRG0000056504   | DreEX0630881  |                      | 6 chr1:15986731-15986835             | 105    | chr1:15986962,15986731+15986835,15986393-15986835,15983264+159830 ANN | S       |           | 97.28333333    | 98.49 | 100   | 93.36 | 81.85666667 | 79.19 | 80.8  | 85.58 | 15.42  |
| terfa             | ENSADRG00000039302  | DreEX0071222  |                      | 12 chr4:76611232-76611339            | 108    | chr4:76611010,76611232-76611339,76611452                              | S       |           | 93.38          | 90.12 | 90.02 | 100   | 76.42333333 | 84.65 | 74.23 | 70.39 | 16.96  |
| atxn2l            | ENSADRG0000011597   | DreEX016244   |                      | 22 chr3:15273851-15273899            | 49     | chr3:15272104,15273851-15273899,15275431                              | S       |           | 27.43333333    | 19.63 | 37.11 | 25.56 | 8.35        | 14.1  | 7.77  | 3.18  | 19.08  |
| derl2             | ENSADRG00000042401  | DreEX0613850  |                      | 6 chr5:58336592-58336682             | 91     | chr5:58335092,58336592-58336682,58338991                              | ANN     |           | 98.45          | 100   | 100   | 95.35 | 78.56666667 | 62.6  | 85.27 | 87.83 | 19.88  |
| amph              | ENSADRG00000007663  | DreEX012972   |                      | 21 chr2:31914057-31914098            | 42     | chr2:31916019,31914057-31914098,31911007                              | C3      |           | 95.86          | 100   | 100   | 87.58 | 74.89666667 | 63.32 | 78.6  | 82.27 | 20.96  |
| brd3a             | ENSADRG00000006527  | DreEX012975   |                      | 9 chr2:18234026-18234094             | 69     | chr2:18234454+18234469,18234026-18234094,18233160                     | S       |           | 67.2           | 66.91 | 69.08 | 65.61 | 44.43333333 | 36.38 | 51.11 | 45.81 | 22.77  |
| atxn7l2b          | ENSADRG0000056268   | DreEX016265   |                      | intron 9-10 chr8:25086221-25086291   | 71     | chr8:25084913,25086221-25086291,25087235                              | S       |           | 27.54333333    | 25.8  | 36.08 | 20.75 | 4.53333333  | 13.6  | 0     | 0     | 23.01  |
| tmx1c1b           | ENSADRG00000060954  | DreEX0092511  |                      | 15 chr11:18032238-18032388           | 151    | chr11:18033100,18032238-18032388,18030527                             | S       |           | 26.53          | 16.6  | 36.48 | 24.53 | 11.56666667 | 0     | 0     | 3.47  | 25.37  |
| fam184a           | ENSADRG0000014081   | DreEX031677   |                      | 18 chr20:41887209-41887417           | 209    | chr20:41883340,41887209-41887417,41902164                             | C1      |           | 34.71333333    | 32.1  | 40.98 | 31.06 | 5.87333333  | 0     | 5.62  | 12    | 28.84  |
| mical3a           | ENSADRG0000021979   | DreEX0046559  |                      | 31 chr18:10924514-10924564           | 51     | chr18:10922220,10924514-10924564,10927410                             | C1      |           | 38.49333333    | 25.37 | 24.2  | 65.91 | 8.93333333  | 8.1   | 0     | 18.7  | 29.56  |
| fbxl3b            | ENSADRG0000021882   | DreEX0624787  |                      | 4 chr6:60007247-60007418             | 172    | chr6:60007833,60007247-60007418,60004605                              | ANN     |           | 100            | 100   | 100   | 100   | 69.12333333 | 51.18 | 64.76 | 91.43 | 30.88  |
| madd              | ENSADRG00000003495  | DreEX0044312  |                      | 36 chr7:34053012-34053081            | 70     | chr7:34056528,34053012-34053081,34050479                              | C1      |           | 94.23          | 100   | 100   | 82.69 | 41.18       | 5.77  | 73.05 | 44.72 | 53.05  |
| neil1             | ENSADRG0000018061   | DreINT0103628 |                      | 5-6 chr25:26386542-26386679          | 138    | chr25:26386680-26386773-26386420-26386541-                            | IR      |           | 0              | 0     | 0     | 0     | 51.08333333 | 56.99 | 51.9  | 44.36 | -51.08 |
| dic               | ENSADRG0000002336   | DreINT0057467 |                      | 6-7 chr15:20530052-20530389          | 338    | chr15:20530390-20530606-20529358-20530051-                            | IR      |           | 19.96333333    | 18.86 | 0     | 41.03 | 68.39       | 48.65 | 100   | 56.52 | -48.43 |
| las1l             | ENSADRG00000062457  | DreINT0086464 |                      | 11-12 chr5:21615475-21617542         | 2068   | chr5:21617543-21617862-21615324-21615474-                             | IR      |           | 0              | 0     | 0     | 0     | 37.65333333 | 32.88 | 76.67 | 7.91  | -37.65 |
| fam214b           | ENSADRG00000068650  | DreINT0066618 |                      | 7-8 chr5:18522054-18524041           | 208    | chr5:18524082-18524240-18521985-18522053-                             | IR      |           | 0.46333333     | 0     | 0     | 1.39  | 28.56333333 | 52.17 | 15.72 | 17.8  | -28.4  |
| snx27b            | ENSADRG0000016977   | DreINT0154148 |                      | 12 chr16:23608849-23608954           | 106    | chr16:23608800-23608848-23608955-23609342+                            | S       |           | 0              | 0     | 0     | 0     | 24.45666667 | 47.95 | 17.09 | 8.33  | -24.16 |
| CAB201084323.1    | ENSADRG00000104937  | DreINT0005264 |                      | 18-19 KN150000.1:37877-40116         | 2240   | KN150000.1:37667-37876-40117-40277+;                                  | IR      |           | 0              | 0     | 0     | 0     | 24.40333333 | 28.42 | 33.61 | 11.18 | -24.4  |
| pus7              | ENSADRG00000031774  | DreINT0122857 |                      | 13-14 chr25:219504-2195787           | 284    | chr25:219402-219503-219788-219917+;                                   | IR      |           | 0              | 0     | 0     | 0     | 24.4        | 19.2  | 48.55 | 5.45  | -24.4  |
| chp1              | ENSADRG00000004023  | DreINT0082688 |                      | 3-4 chr5:40130533-40131949           | 1417   | chr5:40131950-40132209-40130246-40130532-                             | IR      |           | 0              | 0     | 0     | 0     | 16.51333333 | 10.48 | 33.9  | 5.16  | -16.51 |
| ismp1b            | ENSADRG00000099624  | DreINT0046566 |                      | 8-9 chr5:22523710-22523837           | 128    | chr5:22523653-22523709-22523838-22524308+;                            | IR      |           | 36.44333333    | 34.08 | 36.52 | 38.73 | 51.54       | 56.18 | 51.63 | 46.81 | -15.1  |
| tchp              | ENSADRG00000035605  | DreINT0161324 |                      | 11-12 chr5:19375036-19375135         | 100    | chr5:19374892-19375035-19375136-19375452+;                            | IR      |           | 0              | 0     | 0     | 0     | 14.83333333 | 8.3   | 18.72 | 17.48 | -14.83 |
| ndufb2            | ENSADRG00000045490  | DreINT0103274 |                      | 3-4 chr4:22761470-22761553           | 84     | chr4:22761470-22761469-22761554-22762156+;                            | IR      |           | 0.46666667     | 0.51  | 0     | 0.89  | 14.55       | 7     | 27.94 | 8.71  | -14.08 |
| prc1a             | ENSADRG00000100918  | DreINT0191990 |                      | 13-14 chr25:7282830-7284550          | 1721   | chr25:7282871-7282829-7284551-7284985-                                | IR      |           | 0              | 0     | 0     | 0     | 13.42       | 11.57 | 12.16 | 16.53 | -13.42 |
| abce1             | ENSADRG00000007216  | DreINT0024248 |                      | 9-10 chr23:43905513-43905596         | 84     | chr23:43905597-43905686-43905391-43905512-                            | IR      |           | 0              | 0     | 0     | 0     | 13.30666667 | 7.44  | 27.27 | 5.21  | -13.31 |
| CAB20106312.1     | ENSADRG00000100624  | DreINT0004711 |                      | 6-7 chr4:73710365-73710889           | 525    | chr4:73710890-73711064-73710209-73710364-                             | IR      |           | 0              | 0     | 0     | 0     | 12.99333333 | 10.92 | 21.39 | 6.67  | -12.99 |
| vidr              | ENSADRG00000006257  | DreINT0136119 |                      | 17-18 chr10:15346010-15346130        | 121    | chr10:15345840-15346009-15346131-15347025+;                           | IR      |           | 13.02666667    | 14.78 | 13.93 | 10.37 | 25.99       | 24.42 | 25.91 | 24.64 | -12.96 |
| CAB201111915.1    | ENSADRG00000104583  | DreINT0005516 |                      | 1-2 KN149798.1:73-259                | 187    | KN149798.1:34-72=260-475+;                                            | IR      |           | 15.02666667    | 15.23 | 11.4  | 20.46 | 2.07666667  | 2.08  | 3.61  | 0.54  | 12.95  |
| chd4a             | ENSADRG00000063535  | DreINT0046095 |                      | 30-31 chr19:5101861-51013136         | 1276   | chr19:51013137-5103270-5101716-5101860-                               | IR      |           | 14.43666667    | 23.62 | 13.4  | 20.3  | 5.38        | 0     | 0     | 0     | 14.44  |
| khdc4             | ENSADRG00000100206  | DreINT0086909 |                      | 1-2 chr25:12633465-12633552          | 88     | chr25:12633553-12633755-12633733-12633464-                            | IR      |           | 14.49          | 25.17 | 11.97 | 6.33  | 0           | 0     | 0     | 0     | 14.49  |
| vapb              | ENSADRG00000070435  | DreINT0173431 |                      | 3-4 chr6:49629863-49634335           | 4473   | chr6:49629759-49629862-49634336-49634416+;                            | IR      |           | 15.70333333    | 10.92 | 31.15 | 5.04  | 0           | 0     | 0     | 0     | 15.7   |
| actr3             | ENSADRG00000100510  | DreINT0008499 |                      | 6-7 chr9:56884401-56888058           | 658    | chr9:56884401-56888058-56884400-56885059-56885117+;                   | IR      |           | 99.61333333    | 99.58 | 100   | 99.26 | 83.41666667 | 79.81 | 78.77 | 91.67 | 16.19  |
| zfpand2a          | ENSADRG00000103511  | DreINT0177839 |                      | 9-10 chr3:42679832-42680700          | 6869   | chr3:42679832-42679831-42686701-42687238+;                            | IR      |           | 23.72          | 14.07 | 42.11 | 14.98 | 3           | 9     | 0     | 0     | 20.72  |
| epc1b             | ENSADRG000000060054 | DreINT0063555 |                      | 14-15 chr2:43783415-43783655         | 1951   | chr2:43783072-43783414-43785366-43786709+;                            | IR      |           | 21.19          | 24    | 30.77 | 8.8   | 0           | 0     | 0     | 0     | 21.19  |
| si:ch211-13c6.2   | ENSADRG00000027738  | DreINT0136119 |                      | 11-12 chr19:42479760-42479856        | 97     | chr19:42479888-42479759-42479857-42479958+;                           | IR      |           | 21.96666667    | 39.75 | 14.8  | 11.35 | 0           | 0     | 0     | 0     | 21.97  |
| ctsf2             | ENSADRG00000090788  | DreINT0052862 |                      | 13-14 chr14:40994757-40994915        | 159    | chr14:40994916-40995049-40994611-40994756-                            | IR      |           | 41.71          | 46.87 | 36.91 | 41.35 | 18.45666667 | 19.64 | 15.43 | 20.3  | 23.25  |
| hmrnpd            | ENSADRG00000059246  | DreINT0078622 |                      | 6-7 chr10:5001911-5004909            |        |                                                                       |         |           |                |       |       |       |             |       |       |       |        |
