# Supplementary material for: Hnrnpul1 controls transcription, splicing, and modulates skeletal and limb development in vivo
Source: PubMed Central journal article supplement (PMC9073674; doi:10.1093/g3journal/jkac067), 2022-03-23
Supplement: jkac067_supplementary_table_s2.pdf [file jkac067_supplementary_table_s2.pdf]

Blackwell et al., Table S2: Gene expression changes

| NAME            | ID                 | DKO average | WT average  | FC       | Log2(FC)   | p-value  | (-log10pval) |
|-----------------|--------------------|-------------|-------------|----------|------------|----------|--------------|
| aagab           | ENSDARG00000041170 | 12.01666667 | 16.83666667 | 0.71372  | -0.4865698 | 0.0042   | 2.376735264  |
| aars            | ENSDARG00000069142 | 34.63666667 | 47.51       | 0.72904  | -0.4559311 | 0.049612 | 1.304409908  |
| abca3b          | ENSDARG00000100524 | 6.883333333 | 11.24333333 | 0.612215 | -0.7078905 | 0.026001 | 1.585013004  |
| abca4a          | ENSDARG00000057169 | 0.923333333 | 6.406666667 | 0.144121 | -2.7946505 | 0.021052 | 1.676705231  |
| abca4b          | ENSDARG00000062661 | 1.3         | 4.16        | 0.3125   | -1.6780719 | 0.015134 | 1.820043501  |
| abhd16a         | ENSDARG00000078929 | 21.82       | 26.7        | 0.817228 | -0.2911886 | 0.033841 | 1.470559703  |
| abhd8b          | ENSDARG00000076620 | 1.14        | 2.45        | 0.465306 | -1.1037479 | 0.026079 | 1.583705692  |
| abi1a           | ENSDARG00000010155 | 17.73       | 12.87666667 | 1.376909 | 0.4614334  | 0.001286 | 2.890889719  |
| abi3a           | ENSDARG00000060072 | 3.133333333 | 5.876666667 | 0.533182 | -0.9072998 | 0.022227 | 1.653113167  |
| AC024175.17     | ENSDARG00000082753 | 271.6833333 | 464.0166667 | 0.585503 | -0.7722506 | 0.014607 | 1.835428104  |
| AC024175.19     | ENSDARG00000083046 | 62.76       | 116.7566667 | 0.537528 | -0.8955877 | 0.017314 | 1.761590716  |
| AC024175.4      | ENSDARG00000080337 | 25433.27    | 45149.64667 | 0.56331  | -0.8279977 | 0.030377 | 1.517459164  |
| acaca           | ENSDARG00000078512 | 4.9         | 6.516666667 | 0.751918 | -0.4113525 | 0.004366 | 2.35995706   |
| acad8           | ENSDARG00000042658 | 4.3         | 8.526666667 | 0.5043   | -0.9876452 | 0.024884 | 1.604071806  |
| ACADSB (2 of 2) | ENSDARG00000098174 | 4.583333333 | 8.773333333 | 0.522416 | -0.9367279 | 0.028015 | 1.552601788  |
| adal            | ENSDARG00000012986 | 4.566666667 | 2.1         | 2.174603 | 1.1207522  | 0.034416 | 1.463241668  |
| adam23a         | ENSDARG00000062323 | 11.40666667 | 20.68333333 | 0.551491 | -0.8585915 | 0.005937 | 2.226435811  |
| adcy2b          | ENSDARG00000014588 | 1.496666667 | 3.336666667 | 0.448551 | -1.1566546 | 0.038243 | 1.417449193  |
| adcyp1r1a       | ENSDARG00000105201 | 4.826666667 | 9.056666667 | 0.532941 | -0.907953  | 0.02907  | 1.536551145  |
| add3a           | ENSDARG00000040874 | 8.906666667 | 5.146666667 | 1.73057  | 0.7912473  | 0.024394 | 1.612722808  |
| adgra1          | ENSDARG00000054177 | 3.016666667 | 6.573333333 | 0.458925 | -1.1236699 | 0.001365 | 2.864744928  |
| adgrb1a         | ENSDARG00000075133 | 11.45       | 23.68333333 | 0.483462 | -1.0485246 | 0.047853 | 1.320089655  |
| adgrg1          | ENSDARG00000027222 | 8.346666667 | 4.283333333 | 1.948638 | 0.9624662  | 0.018962 | 1.722106135  |
| adi1            | ENSDARG00000020448 | 25.12666667 | 18.22333333 | 1.378818 | 0.4634324  | 0.01418  | 1.848330592  |
| adipor1b        | ENSDARG00000042717 | 10.54       | 17.91666667 | 0.588279 | -0.7654274 | 0.02742  | 1.561937128  |
| adka            | ENSDARG00000039429 | 23.79       | 30.57666667 | 0.778044 | -0.3620759 | 0.047897 | 1.319694617  |
| adprm           | ENSDARG00000026090 | 2.536666667 | 1.57        | 1.615711 | 0.6921694  | 0.038156 | 1.418433138  |
| AEBP1 (1 of 2)  | ENSDARG00000006901 | 15.78       | 11.01       | 1.433243 | 0.5192827  | 0.021744 | 1.662653971  |
| AES (3 of 3)    | ENSDARG00000067832 | 6.503333333 | 10.79333333 | 0.602532 | -0.7308892 | 0.037264 | 1.428713003  |
| agbl5           | ENSDARG00000045900 | 2.27        | 4.263333333 | 0.532447 | -0.9092896 | 0.018458 | 1.733825328  |
| agfg1b          | ENSDARG00000019526 | 6.616666667 | 12.68333333 | 0.521682 | -0.9387574 | 0.032747 | 1.484829824  |
| agpat6          | ENSDARG00000019897 | 16.53       | 24.31       | 0.679967 | -0.5564632 | 0.02453  | 1.610305751  |
| ahcy12          | ENSDARG00000039343 | 9.946666667 | 14.20333333 | 0.700305 | -0.5139445 | 0.040844 | 1.388874318  |
| ahnak           | ENSDARG00000061764 | 42.11333333 | 28.58       | 1.473525 | 0.5592712  | 0.018482 | 1.733256412  |
| aifm1           | ENSDARG00000058088 | 13.86       | 20.69       | 0.669889 | -0.5780064 | 0.014398 | 1.841685353  |
| ak3             | ENSDARG00000058226 | 15.40666667 | 11.74333333 | 1.31195  | 0.3917128  | 0.002086 | 2.680695615  |
| ak5             | ENSDARG00000012555 | 2.686666667 | 5.086666667 | 0.528178 | -0.9209032 | 0.039993 | 1.398013211  |
| akap12b         | ENSDARG00000055678 | 49.17       | 33.85       | 1.452585 | 0.5386225  | 0.044883 | 1.347921532  |
| akap1b          | ENSDARG00000006062 | 1.916666667 | 4.186666667 | 0.457803 | -1.1272026 | 0.004159 | 2.380996744  |
| akt1s1          | ENSDARG00000074667 | 65.20333333 | 44.61666667 | 1.461412 | 0.547363   | 0.004879 | 2.311646234  |
| alas2           | ENSDARG00000038643 | 6.95        | 2.56        | 2.714844 | 1.4408692  | 0.020179 | 1.695102971  |
| alcamb          | ENSDARG00000058538 | 38.67       | 26.16333333 | 1.478023 | 0.5636684  | 0.028712 | 1.541935641  |
| aldh1l1         | ENSDARG00000077004 | 13.55333333 | 10.11333333 | 1.340145 | 0.4223891  | 0.041137 | 1.385762919  |
| aldh7a1         | ENSDARG00000018426 | 29.59333333 | 37.18333333 | 0.795876 | -0.3293839 | 0.039215 | 1.406548088  |
| aldoaa          | ENSDARG00000011665 | 314.4666667 | 281.68      | 1.116397 | 0.15885    | 0.021054 | 1.676671857  |
| alg9            | ENSDARG00000012840 | 15.26333333 | 19.25       | 0.7929   | -0.3347884 | 0.04134  | 1.383633651  |
| alkbh4          | ENSDARG00000052247 | 5.533333333 | 8.683333333 | 0.637236 | -0.6501001 | 0.047039 | 1.32754017   |
| alox12          | ENSDARG00000069463 | 7.9         | 4.426666667 | 1.784639 | 0.8356319  | 0.044598 | 1.350686797  |
| ambra1b         | ENSDARG00000039878 | 3.773333333 | 5.62        | 0.671412 | -0.5747306 | 0.04204  | 1.376337881  |
| amigo3          | ENSDARG00000074469 | 0.37        | 2.183333333 | 0.169466 | -2.5609352 | 0.019305 | 1.714334199  |
| AMIGO3 (2 of 2) | ENSDARG00000079569 | 0.753333333 | 3.546666667 | 0.212406 | -2.2351035 | 0.011289 | 1.9473435    |

|                   |                    |             |             |          |            |          |             |
|-------------------|--------------------|-------------|-------------|----------|------------|----------|-------------|
| amn1              | ENSDARG00000070478 | 1.82        | 3.963333333 | 0.459209 | -1.1227759 | 0.011227 | 1.949747279 |
| amph              | ENSDARG00000007663 | 19.71333333 | 43.19       | 0.456433 | -1.1315256 | 0.008309 | 2.080433063 |
| anapc11           | ENSDARG00000102531 | 126.5133333 | 74.26666667 | 1.703501 | 0.7685027  | 0.006943 | 2.158446233 |
| anapc16           | ENSDARG0000001382  | 80.20333333 | 57.4        | 1.397271 | 0.4826115  | 0.046684 | 1.330828644 |
| angptl2b          | ENSDARG00000068369 | 8.76        | 5.12        | 1.710938 | 0.7747871  | 0.010498 | 1.978878767 |
| ankfy1            | ENSDARG00000061013 | 6.74        | 9.47        | 0.711721 | -0.4906158 | 0.045007 | 1.346716549 |
| ankra2            | ENSDARG00000035399 | 53.38       | 36.31666667 | 1.469849 | 0.5556675  | 0.042327 | 1.373386842 |
| ankrd13c          | ENSDARG00000103831 | 18.05333333 | 29.80333333 | 0.605749 | -0.7232085 | 0.023011 | 1.63806503  |
| ANKRD34A          | ENSDARG00000076719 | 1.523333333 | 2.603333333 | 0.585147 | -0.7731284 | 0.007236 | 2.140479026 |
| ankrd6a           | ENSDARG00000057790 | 0.94        | 2.793333333 | 0.336516 | -1.5712551 | 0.038377 | 1.415923594 |
| ano1              | ENSDARG00000102335 | 1.536666667 | 4.03        | 0.381307 | -1.3909756 | 0.000816 | 3.088059951 |
| ANO2 (1 of 3)     | ENSDARG00000003210 | 0.603333333 | 2.793333333 | 0.21599  | -2.2109605 | 0.032667 | 1.4858858   |
| anp32e            | ENSDARG00000054804 | 227.29      | 326.98      | 0.695119 | -0.5246682 | 0.049835 | 1.302464588 |
| ap1g1             | ENSDARG00000102394 | 7.023333333 | 10.07666667 | 0.69699  | -0.5207907 | 0.028963 | 1.538149958 |
| ap1g2             | ENSDARG00000054337 | 7.623333333 | 10.76666667 | 0.70805  | -0.4980778 | 0.000408 | 3.389199868 |
| apba1b            | ENSDARG00000074328 | 14.54666667 | 25.76666667 | 0.564554 | -0.8248173 | 0.004541 | 2.342843451 |
| APBB3             | ENSDARG00000053771 | 0.996666667 | 2.38        | 0.418768 | -1.2557786 | 0.024955 | 1.60284939  |
| apmap             | ENSDARG00000017422 | 16.27333333 | 27.46666667 | 0.592476 | -0.755172  | 0.003912 | 2.407585494 |
| arf6a             | ENSDARG00000101626 | 16.16666667 | 24.82333333 | 0.651269 | -0.6186746 | 0.025094 | 1.600426278 |
| arfgap3           | ENSDARG00000097583 | 3.516666667 | 2.33        | 1.509299 | 0.5938786  | 0.022419 | 1.64937638  |
| arfgef1           | ENSDARG00000063474 | 5.763333333 | 11.21333333 | 0.513971 | -0.9602398 | 0.000353 | 3.451635855 |
| arfip2a           | ENSDARG00000059244 | 29.18333333 | 40.48       | 0.720932 | -0.4720646 | 0.034183 | 1.466194926 |
| arhgap35          | ENSDARG00000060297 | 4.61        | 7.37        | 0.625509 | -0.6768979 | 0.038652 | 1.412832015 |
| ARHGAP44 (1 of 2) | ENSDARG00000102424 | 0.913333333 | 2.473333333 | 0.369272 | -1.4372433 | 0.025366 | 1.595745495 |
| arhgdia           | ENSDARG00000043795 | 49.99333333 | 77.50666667 | 0.64502  | -0.6325847 | 0.028871 | 1.539534713 |
| arih2             | ENSDARG00000012848 | 23.20666667 | 29.82333333 | 0.778138 | -0.3619022 | 0.02715  | 1.566231152 |
| arl13a            | ENSDARG00000052575 | 6.353333333 | 15.70666667 | 0.404499 | -1.3057914 | 0.005546 | 2.256054968 |
| arl3l2            | ENSDARG00000015404 | 5.513333333 | 28.20666667 | 0.195462 | -2.3550395 | 0.004116 | 2.385533393 |
| arl4aa            | ENSDARG00000099918 | 22.42       | 13.02666667 | 1.721085 | 0.7833183  | 0.041124 | 1.385901531 |
| arl4ab            | ENSDARG00000033182 | 3.326666667 | 6.163333333 | 0.539751 | -0.8896335 | 0.034317 | 1.464494802 |
| arl4cb            | ENSDARG00000032708 | 33.45666667 | 22.74333333 | 1.471054 | 0.55685    | 0.002805 | 2.552112649 |
| arl5c             | ENSDARG00000035719 | 4.556666667 | 6.57        | 0.693557 | -0.5279145 | 0.020444 | 1.689443567 |
| arl8ba            | ENSDARG00000006915 | 13.03       | 17.28333333 | 0.753905 | -0.4075444 | 0.009915 | 2.00370671  |
| arl8bb            | ENSDARG00000070318 | 1.323333333 | 2.866666667 | 0.461628 | -1.1151977 | 0.035032 | 1.455539782 |
| arpc4             | ENSDARG00000054063 | 68.43666667 | 48.27666667 | 1.417593 | 0.5034434  | 0.006311 | 2.199907768 |
| arpc4l            | ENSDARG00000058225 | 149.7866667 | 105.84      | 1.415218 | 0.5010242  | 0.005842 | 2.233427984 |
| arr3a             | ENSDARG00000056511 | 74.46666667 | 252.7133333 | 0.294669 | -1.7628351 | 0.011761 | 1.929569813 |
| arr3b             | ENSDARG00000098475 | 42.03666667 | 103.49      | 0.406191 | -1.2997712 | 0.0398   | 1.400115434 |
| arrdc1b           | ENSDARG00000079839 | 1.09        | 2.106666667 | 0.517405 | -0.9506339 | 0.005701 | 2.244024029 |
| arrdc2            | ENSDARG00000020761 | 6.83        | 5.463333333 | 1.250153 | 0.3221041  | 0.034488 | 1.462326548 |
| asb12a            | ENSDARG00000017086 | 22.72       | 15.75666667 | 1.441929 | 0.5280005  | 0.00014  | 3.852448477 |
| asf1ba            | ENSDARG00000101037 | 20.22       | 15.2        | 1.330263 | 0.4117117  | 0.00096  | 3.017513695 |
| asic1a            | ENSDARG00000008329 | 3.126666667 | 5.08        | 0.615486 | -0.7002031 | 0.035024 | 1.455635179 |
| aspg              | ENSDARG00000052942 | 4.243333333 | 5.923333333 | 0.716376 | -0.4812113 | 0.00716  | 2.145094402 |
| asphd1            | ENSDARG00000075813 | 4.786666667 | 8.533333333 | 0.560938 | -0.8340881 | 0.003013 | 2.521034264 |
| asxl1             | ENSDARG00000036956 | 12.62       | 14.81       | 0.852127 | -0.2308597 | 0.009651 | 2.015447458 |
| atg12             | ENSDARG00000069545 | 25.41       | 13.73       | 1.850692 | 0.8880648  | 0.032278 | 1.491090728 |
| atg4c             | ENSDARG00000044373 | 9.163333333 | 6.176666667 | 1.48354  | 0.569044   | 0.002738 | 2.562641958 |
| atg4da            | ENSDARG00000043548 | 9.773333333 | 11.19       | 0.873399 | -0.1952874 | 0.019621 | 1.707284348 |
| atoh1a            | ENSDARG00000055294 | 6.24        | 2.33        | 2.678112 | 1.4212161  | 0.028771 | 1.541042166 |
| ATP11B            | ENSDARG00000101094 | 5.893333333 | 8.62        | 0.683681 | -0.548604  | 0.027092 | 1.567163695 |
| atp1b1b           | ENSDARG00000076833 | 4.9         | 14.25       | 0.34386  | -1.5401083 | 0.044016 | 1.356393941 |
| atp1b2b           | ENSDARG00000034424 | 10.05       | 27.56666667 | 0.364571 | -1.4557293 | 0.030342 | 1.51794944  |
| atp2b1b           | ENSDARG00000007788 | 12.81       | 29.93333333 | 0.427951 | -1.2244825 | 0.001185 | 2.926136114 |

|                   |                    |             |             |          |            |          |             |
|-------------------|--------------------|-------------|-------------|----------|------------|----------|-------------|
| atp2b2            | ENSDARG00000063433 | 2.726666667 | 6.316666667 | 0.431662 | -1.2120251 | 0.033475 | 1.475274869 |
| atp5g1            |                    | 294.8533333 | 401.33      | 0.73469  | -0.4447915 | 0.001943 | 2.711423339 |
| atp5g3a           |                    | 160.9266667 | 216.7766667 | 0.742362 | -0.4298061 | 0.028558 | 1.544273114 |
| atp6ap1a          | ENSDARG00000041417 | 34.95       | 72.5        | 0.482069 | -1.0526885 | 0.011126 | 1.953680063 |
| ATP6AP1L (1 of 2) | ENSDARG00000090963 | 10.77666667 | 21.78333333 | 0.494721 | -1.0153137 | 0.002243 | 2.649136008 |
| atp6v0cb          | ENSDARG00000036577 | 170.2933333 | 371.8333333 | 0.457983 | -1.1266342 | 0.01165  | 1.933680458 |
| atp6v0d1          | ENSDARG00000069090 | 77.83333333 | 98.60333333 | 0.789358 | -0.3412483 | 0.021977 | 1.658030588 |
| atp6v1aa          | ENSDARG00000034534 | 49.24       | 93.37666667 | 0.527327 | -0.9232313 | 0.016432 | 1.784315517 |
| atp6v1ba          | ENSDARG00000013443 | 56.26333333 | 91.71333333 | 0.61347  | -0.7049365 | 0.001052 | 2.978099924 |
| atp6v1d           | ENSDARG00000011175 | 47.83       | 88.12666667 | 0.542742 | -0.8816628 | 0.008541 | 2.068489356 |
| atp6v1e1b         | ENSDARG00000030694 | 151.0633333 | 210.11      | 0.718973 | -0.4759913 | 0.049092 | 1.308987803 |
| atp6v1g1          | ENSDARG00000022315 | 299.7166667 | 410.77      | 0.729646 | -0.4547315 | 0.01574  | 1.803001097 |
| atp8a2            | ENSDARG00000077492 | 4.853333333 | 9.963333333 | 0.487119 | -1.0376525 | 0.012192 | 1.913915299 |
| atrn1b            | ENSDARG00000006420 | 10.52666667 | 12.48666667 | 0.843033 | -0.2463397 | 0.010352 | 1.984960473 |
| atxn7l2a          | ENSDARG00000055300 | 5.516666667 | 8.623333333 | 0.639737 | -0.6444488 | 0.0343   | 1.464707027 |
| atxn7l3           | ENSDARG00000029331 | 1.736666667 | 4.29        | 0.404817 | -1.3046568 | 0.039032 | 1.408580652 |
| azin1b            | ENSDARG00000035869 | 109.7566667 | 171.4033333 | 0.640341 | -0.6430866 | 0.00212  | 2.673669272 |
| BAALC             | ENSDARG00000089549 | 6.67        | 10.43333333 | 0.639297 | -0.6454415 | 0.010165 | 1.992878338 |
| babam1            | ENSDARG00000077526 | 13.00333333 | 20.12333333 | 0.646182 | -0.6299878 | 0.027172 | 1.565871638 |
| bahd1             | ENSDARG00000086789 | 2.236666667 | 3.72        | 0.601254 | -0.7339524 | 0.005754 | 2.240018684 |
| BAHD1 (2 of 2)    | ENSDARG00000102965 | 0.806666667 | 2.693333333 | 0.299505 | -1.7393482 | 0.005178 | 2.285836086 |
| bambib            | ENSDARG00000099677 | 4.696666667 | 8.576666667 | 0.54761  | -0.8687798 | 0.013353 | 1.874425835 |
| bbc3              | ENSDARG00000069282 | 1.176666667 | 2.646666667 | 0.444584 | -1.1694708 | 0.012515 | 1.902583123 |
| bbs5              | ENSDARG00000039827 | 7.85        | 15.05333333 | 0.521479 | -0.9393184 | 0.016259 | 1.788895306 |
| bbx               | ENSDARG00000012699 | 7.36        | 12.38       | 0.594507 | -0.7502336 | 5.77E-05 | 4.239157452 |
| bc2               |                    | 50.59333333 | 38.48333333 | 1.314682 | 0.3947135  | 0.006153 | 2.210941867 |
| bcat1             | ENSDARG00000045568 | 16.82333333 | 28.54       | 0.589465 | -0.7625217 | 0.023427 | 1.630287232 |
| bckdhb            | ENSDARG00000014676 | 3.466666667 | 7.08        | 0.489642 | -1.0302002 | 0.004594 | 2.337834062 |
| bckdk             | ENSDARG00000016904 | 28.64       | 39.11333333 | 0.732231 | -0.449629  | 0.010356 | 1.984798419 |
| BEGAIN            | ENSDARG00000043673 | 3.243333333 | 8.393333333 | 0.386418 | -1.3717666 | 0.003683 | 2.433757031 |
| bet1l             | ENSDARG00000032037 | 2.516666667 | 6.363333333 | 0.395495 | -1.3382686 | 0.038475 | 1.414819254 |
| bhlhe23           | ENSDARG00000037588 | 39.33666667 | 66.08666667 | 0.595228 | -0.7484845 | 0.021191 | 1.673841412 |
| birc5a            | ENSDARG00000075621 | 19.83333333 | 11.46666667 | 1.729651 | 0.7904811  | 0.019451 | 1.71106503  |
| bnip3             | ENSDARG00000099961 | 10.66666667 | 15.71333333 | 0.678829 | -0.5588799 | 0.030502 | 1.515667731 |
| brd2a             | ENSDARG00000022280 | 16.65       | 24.23333333 | 0.68707  | -0.5414707 | 0.003311 | 2.479988049 |
| BRD8 (2 of 2)     | ENSDARG00000055999 | 2.613333333 | 4.323333333 | 0.604472 | -0.7262529 | 0.049232 | 1.307752444 |
| brk1              | ENSDARG00000041974 | 103.8633333 | 148.1033333 | 0.70129  | -0.5119177 | 0.007826 | 2.10643585  |
| bscl2l            | ENSDARG00000025912 | 29.51333333 | 11.87333333 | 2.485682 | 1.3136419  | 0.007134 | 2.146641156 |
| bsg               | ENSDARG00000019881 | 277.0166667 | 248.2666667 | 1.115803 | 0.1580822  | 0.027927 | 1.553976202 |
| btbd2a            | ENSDARG00000042091 | 14.2        | 23.62666667 | 0.601016 | -0.7345252 | 0.004736 | 2.324633635 |
| btbd6b            | ENSDARG00000032369 | 24.07       | 31.04666667 | 0.775285 | -0.3672022 | 0.001266 | 2.897514575 |
| btc               | ENSDARG00000098112 | 2.69        | 1.66        | 1.620482 | 0.6964229  | 0.039269 | 1.405949849 |
| bub1ba            | ENSDARG00000078825 | 5.023333333 | 2.673333333 | 1.879052 | 0.9100053  | 0.021313 | 1.671357707 |
| bud31             | ENSDARG00000017084 | 81.37       | 60.50333333 | 1.344885 | 0.4274824  | 0.048947 | 1.310274111 |
| BX321873.1        | ENSDARG00000098447 | 10.42333333 | 6.526666667 | 1.597038 | 0.6753985  | 0.00896  | 2.047675238 |
| BX324179.3        | ENSDARG00000103008 | 2.536666667 | 0.663333333 | 3.824121 | 1.935128   | 0.035419 | 1.450762692 |
| BX510909.3        |                    | 11.57       | 8.91        | 1.298541 | 0.3768915  | 0.003945 | 2.403943314 |
| BX511246.1        | ENSDARG00000100234 | 3.296666667 | 0           | 4.296667 | 2.1032179  | 0.000305 | 3.515251163 |
| BX572103.7        | ENSDARG00000104062 | 6.103333333 | 2.216666667 | 2.753383 | 1.4612055  | 0.00672  | 2.172600464 |
| BX901974.1        | ENSDARG00000067592 | 3.376666667 | 5.283333333 | 0.639117 | -0.6458487 | 0.037757 | 1.423008013 |
| BX927081.1        | ENSDARG00000105300 | 0.97        | 4.3         | 0.225581 | -2.14828   | 0.010025 | 1.998923898 |
| BX957331.1        | ENSDARG00000098380 | 162.4266667 | 249.5733333 | 0.650817 | -0.6196753 | 0.034812 | 1.458276618 |
| C13H10orf32       |                    | 24.71333333 | 18.32       | 1.348981 | 0.4318701  | 0.043899 | 1.357542432 |
| C13H6orf203       | ENSDARG00000077614 | 32.80666667 | 21.54666667 | 1.522587 | 0.6065243  | 0.027512 | 1.56048523  |

|                     |                    |             |             |          |            |          |             |
|---------------------|--------------------|-------------|-------------|----------|------------|----------|-------------|
| C18H15orf59         | ENSDARG00000026247 | 7.563333333 | 15.52666667 | 0.487119 | -1.037654  | 0.022335 | 1.651020047 |
| C1H3orf70 (2 of 2)  | ENSDARG00000091513 | 6.646666667 | 9.573333333 | 0.69429  | -0.5263903 | 3.39E-05 | 4.469798352 |
| C1H4orf27           |                    | 20.46666667 | 16.05333333 | 1.274917 | 0.3504033  | 0.012609 | 1.899313444 |
| C1H4orf33           | ENSDARG00000017985 | 18.78       | 10.16666667 | 1.847213 | 0.8853503  | 0.002599 | 2.585135391 |
| C20H2orf44          | ENSDARG00000016528 | 1.56        | 3.213333333 | 0.485477 | -1.0425246 | 0.009718 | 2.012426645 |
| C20H2orf71 (1 of 2) | ENSDARG00000095802 | 1.323333333 | 5.27        | 0.251107 | -1.9936265 | 0.01314  | 1.881409483 |
| C20H2orf71 (2 of 2) | ENSDARG00000102288 | 1.686666667 | 4.813333333 | 0.350416 | -1.5128615 | 0.019741 | 1.704640255 |
| C21H18orf54         | ENSDARG00000071487 | 2.406666667 | 1.16        | 2.074713 | 1.0529115  | 0.043902 | 1.35751917  |
| C21H5orf24 (2 of 2) | ENSDARG00000104582 | 13.15       | 25.18       | 0.52224  | -0.9372155 | 0.008352 | 2.078217164 |
| C24H8orf33          |                    | 7.56        | 5.76        | 1.3125   | 0.3923174  | 0.040972 | 1.387508221 |
| C3H19orf43          |                    | 40.02333333 | 32.22       | 1.242189 | 0.3128848  | 0.012499 | 1.903118795 |
| C3H19orf52          |                    | 29.76666667 | 21.41333333 | 1.3901   | 0.4751883  | 0.012127 | 1.916241157 |
| C5H3orf30           | ENSDARG00000093783 | 2.69        | 0.753333333 | 3.570796 | 1.8362459  | 0.048682 | 1.312633896 |
| C5H9orf142          | ENSDARG00000078807 | 15.45       | 8.583333333 | 1.8      | 0.8479969  | 0.025237 | 1.59795413  |
| C5H9orf16           |                    | 38.75333333 | 35.48       | 1.092259 | 0.1273144  | 0.011657 | 1.93339857  |
| C8H9orf64           |                    | 7.713333333 | 5.986666667 | 1.288419 | 0.3656015  | 0.002392 | 2.621157284 |
| C9H2orf49           | ENSDARG00000042025 | 9.713333333 | 15.13666667 | 0.641709 | -0.6400092 | 0.032926 | 1.482462154 |
| CA10 (1 of 2)       | ENSDARG00000009568 | 1.956666667 | 4.093333333 | 0.478013 | -1.0648782 | 0.021793 | 1.661684464 |
| ca10a               | ENSDARG00000052644 | 18.20666667 | 25.62666667 | 0.710458 | -0.493179  | 0.00705  | 2.151834092 |
| ca16b               | ENSDARG00000060123 | 3.79        | 5.52        | 0.686594 | -0.5424704 | 0.005399 | 2.267683948 |
| cab39               | ENSDARG00000043451 | 19.90666667 | 27.41666667 | 0.726079 | -0.4618015 | 0.028861 | 1.539687121 |
| CABZ01025393.1      | ENSDARG00000044600 | 2.156666667 | 4.403333333 | 0.48978  | -1.0297928 | 0.026707 | 1.573380857 |
| CABZ01030107.1      | ENSDARG00000058631 | 5.883333333 | 1.51        | 3.896247 | 1.9620852  | 0.001302 | 2.885271346 |
| CABZ01041962.1      | ENSDARG00000076082 | 12.28       | 5.413333333 | 2.268473 | 1.1817214  | 0.000447 | 3.34988383  |
| CABZ01071911.1      | ENSDARG00000090998 | 12.43666667 | 8.313333333 | 1.49599  | 0.5811009  | 0.009427 | 2.025648735 |
| CABZ01088567.1      | ENSDARG00000103065 | 2.25        | 7.203333333 | 0.312355 | -1.6787397 | 0.044809 | 1.348636589 |
| cacna1db            | ENSDARG00000101589 | 0.646666667 | 4.903333333 | 0.131883 | -2.9226687 | 0.002543 | 2.594646784 |
| cadm3               | ENSDARG00000057013 | 5.48        | 8.87        | 0.617813 | -0.6947582 | 0.025902 | 1.586665401 |
| cadm4               | ENSDARG00000040291 | 13.39       | 37.86       | 0.353671 | -1.4995185 | 0.022116 | 1.655294089 |
| cadpsb              | ENSDARG00000070567 | 16.53666667 | 26.64       | 0.620746 | -0.6879256 | 0.004656 | 2.331947606 |
| calb2a              | ENSDARG00000041062 | 74.11666667 | 125.73      | 0.589491 | -0.762459  | 0.046953 | 1.32833476  |
| calb2b              | ENSDARG00000036344 | 75.15       | 167.38      | 0.448978 | -1.1552821 | 0.019412 | 1.71193083  |
| calm1b              | ENSDARG00000034187 | 124.3766667 | 252.3866667 | 0.492802 | -1.0209198 | 0.01379  | 1.860431431 |
| calub               | ENSDARG00000005115 | 30.17666667 | 19.66333333 | 1.534667 | 0.6179255  | 0.032992 | 1.481596415 |
| camk2d2             | ENSDARG00000014273 | 18.75       | 30.72333333 | 0.610285 | -0.7124442 | 0.038345 | 1.416295478 |
| CAMK2N1             | ENSDARG00000101387 | 25.98666667 | 49.22       | 0.52797  | -0.9214731 | 0.02657  | 1.575604752 |
| camkk1b             | ENSDARG00000015134 | 0.566666667 | 2.906666667 | 0.194954 | -2.3587934 | 0.018706 | 1.728015896 |
| camkvb              | ENSDARG00000005141 | 3.44        | 7.186666667 | 0.478664 | -1.0629142 | 0.000666 | 3.17662377  |
| CAMSAP3 (2 of 2)    | ENSDARG00000091359 | 6.436666667 | 11.88666667 | 0.541503 | -0.8849585 | 0.026876 | 1.570631693 |
| camta1a             | ENSDARG00000077428 | 3.346666667 | 7.056666667 | 0.474256 | -1.076262  | 0.009172 | 2.037515313 |
| cant1a              | ENSDARG00000012192 | 11.53666667 | 7.77        | 1.48477  | 0.5702399  | 0.041268 | 1.384387169 |
| cas kb              | ENSDARG00000100119 | 29.92333333 | 47.67333333 | 0.627674 | -0.6719116 | 0.048822 | 1.311387769 |
| CASKIN1 (2 of 2)    | ENSDARG00000100166 | 10.07666667 | 16.35666667 | 0.616059 | -0.6988603 | 0.049331 | 1.30687738  |
| cat                 | ENSDARG00000104702 | 17.22333333 | 26.17       | 0.658133 | -0.6035495 | 0.014042 | 1.852559259 |
| cbln2b              | ENSDARG00000077151 | 25.69666667 | 43.52666667 | 0.590366 | -0.7603183 | 0.030901 | 1.51003139  |
| cby1                | ENSDARG00000077409 | 13.29666667 | 8.696666667 | 1.528938 | 0.6125302  | 0.034097 | 1.467284786 |
| CCDC34 (2 of 2)     | ENSDARG00000102725 | 13.50333333 | 3.696666667 | 3.65284  | 1.8690187  | 0.014674 | 1.833466118 |
| ccdc47              | ENSDARG00000054362 | 54.16666667 | 64.99666667 | 0.833376 | -0.2629604 | 0.030889 | 1.510199448 |
| ccdc53              |                    | 14.97666667 | 12.87666667 | 1.163086 | 0.2179574  | 0.046747 | 1.330244871 |
| ccdc85al            | ENSDARG00000005343 | 4.236666667 | 7.25        | 0.584368 | -0.7750514 | 0.046291 | 1.334507274 |
| CCDC86              | ENSDARG00000059908 | 76.94333333 | 44.70333333 | 1.721199 | 0.7834139  | 0.034774 | 1.458741822 |
| ccdc94              |                    | 15.40333333 | 18.30333333 | 0.841559 | -0.2488638 | 0.037744 | 1.423153296 |
| ccnb1               | ENSDARG00000051923 | 35.50333333 | 23.53       | 1.508854 | 0.5934532  | 0.028168 | 1.55025011  |
| ccnb2               | ENSDARG00000036180 | 5.606666667 | 3.96        | 1.415825 | 0.5016429  | 0.011043 | 1.956921568 |

|                  |                    |             |             |          |            |          |             |
|------------------|--------------------|-------------|-------------|----------|------------|----------|-------------|
| ccne2            | ENSDARG00000098529 | 20.38666667 | 13.09333333 | 1.557026 | 0.6387935  | 0.012202 | 1.913571154 |
| ccnt2b           | ENSDARG00000036510 | 16.84666667 | 23.08666667 | 0.729714 | -0.4545967 | 0.0192   | 1.716707498 |
| cd151            | ENSDARG00000038288 | 5.69        | 2.883333333 | 1.97341  | 0.980691   | 0.031569 | 1.500737795 |
| cd36             | ENSDARG00000032639 | 4.91        | 6.796666667 | 0.722413 | -0.4691043 | 0.04856  | 1.31372328  |
| cdc123           | ENSDARG00000075025 | 19.13333333 | 9.99        | 1.915249 | 0.9375317  | 0.03238  | 1.489723951 |
| cdc14ab          | ENSDARG00000057016 | 10.85333333 | 8.713333333 | 1.245601 | 0.3168416  | 0.03397  | 1.468909275 |
| cdc20            | ENSDARG00000100741 | 16.82666667 | 10.87333333 | 1.547517 | 0.6299551  | 0.049774 | 1.303001193 |
| cdc42ep4a        | ENSDARG00000101457 | 6.473333333 | 8.87        | 0.729801 | -0.4544253 | 0.033912 | 1.469643423 |
| cdh6             | ENSDARG00000014522 | 13.42       | 21.64666667 | 0.619957 | -0.6897602 | 0.033554 | 1.474249264 |
| CDHR1 (2 of 2)   | ENSDARG00000104756 | 1.593333333 | 4.576666667 | 0.348143 | -1.5222491 | 0.005016 | 2.299650029 |
| cdhr1a           | ENSDARG00000004643 | 1.17        | 6.033333333 | 0.193923 | -2.3664468 | 0.014365 | 1.842691242 |
| cdipt            | ENSDARG00000070686 | 17.06666667 | 32.44333333 | 0.526045 | -0.9267407 | 0.002636 | 2.579029812 |
| cdk1             | ENSDARG00000087554 | 52.33666667 | 39.31666667 | 1.331157 | 0.412681   | 0.034323 | 1.46441014  |
| cdk12            | ENSDARG00000063726 | 3.67        | 5.98        | 0.613712 | -0.7043654 | 0.050022 | 1.300842232 |
| cdk2             | ENSDARG00000026577 | 21.07666667 | 14.03666667 | 1.501544 | 0.5864463  | 0.026282 | 1.5803414   |
| cdk9             | ENSDARG00000044811 | 29.62666667 | 39.26666667 | 0.754499 | -0.4064088 | 0.037773 | 1.422823007 |
| cdkl5            | ENSDARG00000015240 | 4.223333333 | 8.953333333 | 0.471705 | -1.0840428 | 0.007938 | 2.100290864 |
| cdon             | ENSDARG00000061328 | 19.45       | 15.28666667 | 1.272351 | 0.3474963  | 0.042022 | 1.376520525 |
| cdr2l            | ENSDARG00000026834 | 19.47       | 24.49333333 | 0.79491  | -0.3311362 | 0.012695 | 1.896376711 |
| celf5a           | ENSDARG00000071375 | 3.233333333 | 7.52        | 0.429965 | -1.2177104 | 0.016042 | 1.794731953 |
| cenpk            | ENSDARG00000039616 | 13.64666667 | 8.02        | 1.701579 | 0.7668745  | 0.015822 | 1.800744115 |
| cenpw            | ENSDARG00000092136 | 21.37666667 | 15.05       | 1.420377 | 0.5062734  | 0.022638 | 1.645159303 |
| cep19            | ENSDARG00000059175 | 2.08        | 4.113333333 | 0.505673 | -0.9837245 | 0.005742 | 2.240913292 |
| cep290           | ENSDARG00000062727 | 3.413333333 | 6.103333333 | 0.559257 | -0.8384161 | 0.003316 | 2.479351406 |
| cep85            | ENSDARG00000060215 | 5.313333333 | 3.43        | 1.549077 | 0.6314086  | 0.007603 | 2.119026631 |
| ces3             | ENSDARG00000041595 | 0.97        | 4.053333333 | 0.239309 | -2.0630522 | 0.030863 | 1.510558599 |
| cfp              | ENSDARG00000094451 | 7.15        | 1.116666667 | 6.402985 | 2.6787446  | 3.56E-05 | 4.448373422 |
| cgrep1           | ENSDARG00000075444 | 9.59        | 6.916666667 | 1.386506 | 0.4714539  | 0.024447 | 1.611779754 |
| chac1            | ENSDARG00000070426 | 102.9033333 | 185.0733333 | 0.556014 | -0.8468073 | 0.012269 | 1.91118304  |
| chd5             | ENSDARG00000105083 | 5.693333333 | 10.30666667 | 0.552393 | -0.8562323 | 0.043455 | 1.361957253 |
| chm              | ENSDARG00000003845 | 7.26        | 10.54333333 | 0.688587 | -0.5382896 | 0.027068 | 1.567542951 |
| chmp4ba          | ENSDARG00000016255 | 24.58       | 33.45333333 | 0.734755 | -0.4446651 | 0.048971 | 1.310065334 |
| chmp5a           | ENSDARG00000038855 | 7.05        | 10.96666667 | 0.642857 | -0.6374299 | 0.001647 | 2.783318836 |
| chn1             | ENSDARG00000101735 | 38.80333333 | 54.50666667 | 0.711901 | -0.4902521 | 0.043423 | 1.362277848 |
| chodl            | ENSDARG00000034528 | 2.963333333 | 7.75        | 0.382366 | -1.3869754 | 0.012788 | 1.893202237 |
| chordc1b         | ENSDARG00000017067 | 20.16333333 | 23.94666667 | 0.84201  | -0.2480907 | 0.006488 | 2.187856732 |
| chp2             | ENSDARG00000025788 | 14.96666667 | 8.336666667 | 1.795282 | 0.8442104  | 0.005098 | 2.292607345 |
| chrnb3a          | ENSDARG00000052764 | 7.666666667 | 13.01666667 | 0.588988 | -0.7636887 | 0.041021 | 1.386997656 |
| chst1            | ENSDARG00000088593 | 14.77333333 | 18.37       | 0.80421  | -0.3143562 | 0.025318 | 1.59656425  |
| chst2b           | ENSDARG00000058585 | 7.936666667 | 5.583333333 | 1.421493 | 0.5074065  | 0.021799 | 1.661572081 |
| churc1           | ENSDARG00000010831 | 53.65333333 | 39.58       | 1.355567 | 0.4388962  | 0.035344 | 1.451687904 |
| ciao1            | ENSDARG00000059212 | 33.60666667 | 20.95333333 | 1.603882 | 0.6815677  | 0.004219 | 2.374823619 |
| cib2             | ENSDARG00000102820 | 16.17666667 | 24.41       | 0.662707 | -0.5935579 | 0.015507 | 1.809482576 |
| cicb             | ENSDARG00000055502 | 9.506666667 | 14.37       | 0.661563 | -0.5960486 | 0.045306 | 1.343841826 |
| cinp             | ENSDARG00000073910 | 16.75       | 8.196666667 | 2.043514 | 1.0310519  | 0.007281 | 2.137781676 |
| ckap2l           | ENSDARG00000100573 | 7.2         | 4.253333333 | 1.69279  | 0.759403   | 0.032352 | 1.490099761 |
| ckbb             | ENSDARG00000043257 | 809.16      | 1093.59     | 0.739912 | -0.434575  | 0.002364 | 2.626441469 |
| ckmt2a           | ENSDARG00000069615 | 54.17666667 | 136.3833333 | 0.397238 | -1.3319238 | 0.024538 | 1.610153833 |
| CKN149934.1H1orf |                    | 20.13       | 27.06666667 | 0.743719 | -0.4271701 | 0.043654 | 1.359978197 |
| CKN150339.1H9orf | ENSDARG00000102865 | 1.943333333 | 3.013333333 | 0.644912 | -0.6328269 | 0.020899 | 1.679866389 |
| cks1b            | ENSDARG00000007971 | 40.14333333 | 24.40666667 | 1.644769 | 0.7178851  | 0.012593 | 1.89986296  |
| cldn11a          | ENSDARG00000020031 | 39.49666667 | 26.22333333 | 1.506165 | 0.5908798  | 0.02094  | 1.679017485 |
| cldn19           | ENSDARG00000044569 | 2.523333333 | 1.026666667 | 2.457792 | 1.2973629  | 0.006763 | 2.169846837 |
| cldn5a           | ENSDARG00000043716 | 7.516666667 | 4.6         | 1.634058 | 0.7084592  | 0.014285 | 1.845131154 |

|                 |                    |             |             |          |            |          |             |
|-----------------|--------------------|-------------|-------------|----------|------------|----------|-------------|
| clndnd1a        | ENSDARG00000104439 | 13.67       | 23.21666667 | 0.588801 | -0.7641476 | 0.028343 | 1.54755575  |
| clgn            | ENSDARG00000009315 | 27.84333333 | 35.81333333 | 0.777457 | -0.3631649 | 0.029273 | 1.533530301 |
| clstn1          | ENSDARG00000031720 | 50.85       | 88.55       | 0.574252 | -0.8002445 | 0.027427 | 1.561821445 |
| clstn2          | ENSDARG00000060637 | 2.943333333 | 6.563333333 | 0.448451 | -1.1569778 | 0.008752 | 2.057895387 |
| clstn3          | ENSDARG00000073883 | 16.52       | 33.06666667 | 0.499597 | -1.0011639 | 0.037618 | 1.424598882 |
| clta            | ENSDARG00000045618 | 123.5366667 | 188.3233333 | 0.655982 | -0.6082725 | 0.013832 | 1.859112843 |
| cltca           | ENSDARG00000043493 | 26.37666667 | 39.55       | 0.66692  | -0.5844154 | 0.015642 | 1.805693927 |
| cltcb           | ENSDARG00000090716 | 30.03666667 | 46.41333333 | 0.647156 | -0.6278146 | 0.022635 | 1.645220473 |
| cmya5           | ENSDARG00000061379 | 3.93        | 1.023333333 | 3.840391 | 1.9412532  | 0.000823 | 3.084433149 |
| cnbpa           | ENSDARG00000045776 | 226.87      | 170.35      | 1.331787 | 0.4133639  | 0.033222 | 1.478568961 |
| CNGB3 (2 of 2)  | ENSDARG00000101368 | 2.716666667 | 13.45       | 0.201983 | -2.3076967 | 0.012918 | 1.888821308 |
| cnot3a          | #N/A               | 10.90333333 | 15.17666667 | 0.718427 | -0.4770857 | 0.004783 | 2.320258074 |
| cnpy1           | ENSDARG00000003757 | 18.61       | 11.52666667 | 1.614517 | 0.6911027  | 0.012077 | 1.918052887 |
| cntn1b          | ENSDARG00000045685 | 9.306666667 | 15.00333333 | 0.620307 | -0.6889466 | 0.014686 | 1.833106024 |
| cntnap5l        | ENSDARG00000073802 | 1.25        | 3.013333333 | 0.414823 | -1.2694322 | 0.000215 | 3.668163567 |
| coa3            |                    | 35.88       | 47.09       | 0.761945 | -0.3922408 | 0.033997 | 1.468561093 |
| coa7            | ENSDARG00000019355 | 3.303333333 | 6.253333333 | 0.528252 | -0.9207029 | 0.036744 | 1.43481276  |
| commd7          | ENSDARG00000036784 | 36.31333333 | 21.13333333 | 1.718297 | 0.780979   | 0.001568 | 2.804613798 |
| commd8          | ENSDARG00000028201 | 13.16666667 | 21.24333333 | 0.619802 | -0.69012   | 0.003158 | 2.500572211 |
| cops4           | ENSDARG00000043732 | 41.91       | 52.05666667 | 0.805084 | -0.3127884 | 0.037787 | 1.422658895 |
| copz1           | ENSDARG00000017844 | 148.3233333 | 112.1166667 | 1.322937 | 0.4037448  | 0.011723 | 1.930970168 |
| coq3            | ENSDARG00000069857 | 14.98333333 | 17.69666667 | 0.846675 | -0.240119  | 0.02581  | 1.588209119 |
| coro1ca         | ENSDARG00000035598 | 28.53       | 19.82666667 | 1.438971 | 0.5250376  | 0.00051  | 3.292281923 |
| coro2ba         | ENSDARG00000079440 | 1.03        | 2.303333333 | 0.447178 | -1.1610789 | 0.044069 | 1.355867031 |
| cox4i1l         | ENSDARG00000012388 | 12.66666667 | 3.156666667 | 4.012672 | 2.0045631  | 0.047191 | 1.326140216 |
| COX5B (1 of 3)  | ENSDARG00000011208 | 8.856666667 | 19.01       | 0.465895 | -1.1019228 | 0.001794 | 2.746294353 |
| cox6b1          | ENSDARG00000045230 | 237.86      | 197.4833333 | 1.204456 | 0.2683818  | 0.01239  | 1.90693148  |
| cox6c           | ENSDARG00000038577 | 661.0333333 | 536.35      | 1.232466 | 0.3015483  | 0.024278 | 1.614781754 |
| COX7A2 (2 of 2) | ENSDARG00000086341 | 140.32      | 78.48       | 1.787971 | 0.8383237  | 0.005258 | 2.279182223 |
| cox8a           | ENSDARG00000095273 | 292.7966667 | 411.7233333 | 0.711149 | -0.4917761 | 0.045794 | 1.339195357 |
| CPAMD8          | ENSDARG00000056530 | 3.876666667 | 2.023333333 | 1.91598  | 0.9380827  | 0.044925 | 1.347513303 |
| cpe             | ENSDARG00000055874 | 99.59       | 133.8566667 | 0.744005 | -0.4266162 | 0.006473 | 2.188917646 |
| cplx3a          | ENSDARG00000099196 | 0           | 3.163333333 | 0.240192 | -2.0577391 | 0.049878 | 1.302092322 |
| cpne4a          | ENSDARG00000101095 | 5.653333333 | 9.57        | 0.590735 | -0.7594172 | 0.042229 | 1.374388361 |
| cpsf1           | ENSDARG00000034178 | 11.44333333 | 8.676666667 | 1.318863 | 0.3992945  | 0.032101 | 1.493487196 |
| cpt1aa          | ENSDARG00000059770 | 14.18333333 | 11.03666667 | 1.28511  | 0.3618921  | 0.026526 | 1.576326493 |
| CR388042.1      | ENSDARG00000104048 | 8.973333333 | 3.463333333 | 2.590953 | 1.3734828  | 0.013126 | 1.881880509 |
| CR974475.2      | ENSDARG00000090107 | 3.69        | 1.183333333 | 3.11831  | 1.6407643  | 0.040472 | 1.39284437  |
| crabp1b         | ENSDARG00000035904 | 21.58666667 | 18.34333333 | 1.176813 | 0.2348847  | 0.045713 | 1.339963657 |
| crabp2a         | ENSDARG00000073978 | 44.72       | 20.91333333 | 2.138349 | 1.0964972  | 0.000752 | 3.123587927 |
| creb3l3l        | ENSDARG00000020926 | 30.18666667 | 41.41666667 | 0.728853 | -0.4563    | 0.008703 | 2.060333855 |
| crmp1           | ENSDARG00000056742 | 18.14       | 40.52333333 | 0.447643 | -1.1595784 | 0.014444 | 1.840320543 |
| cry2a           | ENSDARG00000069074 | 37.29333333 | 57.77333333 | 0.645511 | -0.631486  | 0.017539 | 1.755988803 |
| cry5            | ENSDARG00000019498 | 1.956666667 | 3.456666667 | 0.566056 | -0.8209835 | 0.031226 | 1.505483704 |
| cry-dash        | ENSDARG00000002396 | 5.013333333 | 8.14        | 0.615889 | -0.6992586 | 0.020508 | 1.688087282 |
| csf1a           | ENSDARG00000075343 | 3.83        | 2.076666667 | 1.844302 | 0.8830747  | 0.04447  | 1.351931392 |
| csnk1db         | ENSDARG00000006125 | 26.11       | 39.96666667 | 0.653294 | -0.6141948 | 0.009337 | 2.029808125 |
| csnk2a2a        | ENSDARG00000012818 | 11.96333333 | 19.46333333 | 0.61466  | -0.7021394 | 0.016389 | 1.785456482 |
| csnk2a2b        | ENSDARG00000013582 | 11.61333333 | 22.89       | 0.507354 | -0.9789353 | 0.049487 | 1.305505777 |
| cspg5a          | ENSDARG00000069981 | 65.13333333 | 112.55      | 0.578706 | -0.7890981 | 0.041066 | 1.386522293 |
| cst14a.2        | ENSDARG00000045352 | 212.8033333 | 135.8       | 1.567035 | 0.6480373  | 0.016236 | 1.789527268 |
| ctage5          | ENSDARG00000099973 | 9.666666667 | 16.16666667 | 0.597938 | -0.7419318 | 0.046438 | 1.33312993  |
| CTBP1           | ENSDARG00000019213 | 17.85666667 | 27.47       | 0.650042 | -0.6213941 | 0.003603 | 2.443326823 |
| ctbp2a          | ENSDARG00000044062 | 29.39333333 | 60.19       | 0.488342 | -1.0340348 | 0.008155 | 2.088580891 |

|                  |                    |             |             |          |            |          |             |
|------------------|--------------------|-------------|-------------|----------|------------|----------|-------------|
| cth              | ENSDARG00000074301 | 42.92333333 | 28.30333333 | 1.516547 | 0.6007901  | 0.042183 | 1.374859577 |
| ctnnbl1          | ENSDARG00000011958 | 22.47333333 | 18.48333333 | 1.21587  | 0.2819892  | 0.044239 | 1.354198916 |
| CU929126.1       | ENSDARG00000102443 | 0.926666667 | 2.486666667 | 0.372654 | -1.4240907 | 0.037447 | 1.426583168 |
| cuedc1a          | ENSDARG00000068716 | 12.95       | 22.73666667 | 0.569565 | -0.8120687 | 0.010062 | 1.997336858 |
| CUTA             | ENSDARG00000054288 | 8.66        | 4.743333333 | 1.82572  | 0.8684658  | 0.023868 | 1.622178269 |
| cwf1911          | ENSDARG00000002128 | 6.573333333 | 9.72        | 0.676269 | -0.5643312 | 0.047345 | 1.324726614 |
| cx52.9           | ENSDARG00000086453 | 0.793333333 | 2.83        | 0.28033  | -1.834803  | 0.002823 | 2.549291829 |
| cxcl12a          | ENSDARG00000037116 | 94.37333333 | 53.53333333 | 1.762889 | 0.8179418  | 0.030244 | 1.519363281 |
| cxxc1a           | ENSDARG00000101996 | 23.92333333 | 4.053333333 | 5.902138 | 2.5612377  | 0.006967 | 2.156932325 |
| cyb561d2         | ENSDARG00000044114 | 6.156666667 | 3.433333333 | 1.793204 | 0.8425395  | 0.021198 | 1.673708655 |
| cyb5r1           | ENSDARG00000018966 | 8.94        | 12.74333333 | 0.701543 | -0.511396  | 0.030738 | 1.51232174  |
| cyhr1            | ENSDARG00000061057 | 4.156666667 | 6.996666667 | 0.594092 | -0.7512407 | 0.01261  | 1.899289444 |
| cyt1l            | ENSDARG00000036832 | 4119.003333 | 1104.243333 | 3.730159 | 1.8992372  | 0.005503 | 2.259427752 |
| cyth3a           | ENSDARG00000007807 | 7.72        | 10.96       | 0.70438  | -0.505575  | 0.023133 | 1.635775341 |
| dact2            | ENSDARG00000056986 | 2.876666667 | 1.506666667 | 1.909292 | 0.9330378  | 0.00043  | 3.366218388 |
| dagla            | ENSDARG00000062956 | 5.166666667 | 8.353333333 | 0.618516 | -0.6931182 | 0.046307 | 1.334350834 |
| dalrd3           | ENSDARG00000068602 | 14.77333333 | 22.96       | 0.643438 | -0.6361273 | 0.034476 | 1.462483758 |
| dbpb             | ENSDARG00000057652 | 3.076666667 | 5.193333333 | 0.592426 | -0.7552927 | 0.04849  | 1.314350877 |
| dcaf15           | ENSDARG00000077790 | 3.666666667 | 5.396666667 | 0.679432 | -0.5575995 | 0.03032  | 1.518271062 |
| dclk1a           | ENSDARG00000018856 | 9.486666667 | 16.84666667 | 0.563118 | -0.82849   | 0.013193 | 1.879643507 |
| dcp1b            | ENSDARG00000045484 | 2.076666667 | 4.716666667 | 0.440283 | -1.183498  | 0.049489 | 1.305489124 |
| dctn2            | ENSDARG00000031388 | 106.59      | 84.30333333 | 1.264363 | 0.3384105  | 0.018847 | 1.724763697 |
| ddb1             | ENSDARG00000074431 | 15.20333333 | 30.89666667 | 0.49207  | -1.0230635 | 0.016832 | 1.773861228 |
| ddhd1a           | ENSDARG00000086808 | 2.12        | 3.26        | 0.650307 | -0.6208077 | 0.034152 | 1.466585156 |
| ddx55            | ENSDARG00000009864 | 6.503333333 | 5.146666667 | 1.263601 | 0.337541   | 0.048463 | 1.314587708 |
| decr2            | ENSDARG00000045257 | 10.97333333 | 7.083333333 | 1.549176 | 0.6315015  | 0.041392 | 1.383086557 |
| dennd5b          | ENSDARG00000003789 | 7.676666667 | 13.1        | 0.586005 | -0.7710149 | 0.006991 | 2.15546363  |
| denr             | ENSDARG00000037229 | 52.13333333 | 72.96333333 | 0.714514 | -0.4849655 | 0.028238 | 1.549162072 |
| desi1a           | ENSDARG00000033140 | 22.77       | 34.81333333 | 0.65406  | -0.6125057 | 0.013495 | 1.869816591 |
| desi2            | ENSDARG00000004460 | 11.57333333 | 15.69       | 0.737625 | -0.4390409 | 0.035739 | 1.446853514 |
| dhcr7            | ENSDARG00000103226 | 2.01        | 3.196666667 | 0.62878  | -0.6693728 | 0.002812 | 2.550923452 |
| dhrs2            | ENSDARG00000021135 | 12.22333333 | 6.426666667 | 1.901971 | 0.9274952  | 0.008263 | 2.082855914 |
| dhx37            | ENSDARG00000062612 | 2.546666667 | 3.88        | 0.656357 | -0.6074465 | 0.011564 | 1.936879337 |
| diablob          | ENSDARG00000014956 | 20.76       | 14.73       | 1.409369 | 0.495049   | 0.012841 | 1.89140114  |
| dlgap4a          | ENSDARG00000060849 | 9.693333333 | 15.24333333 | 0.635906 | -0.6531137 | 0.03446  | 1.462686927 |
| dmbx1a           | ENSDARG00000009922 | 13.53333333 | 25.65       | 0.527615 | -0.9224416 | 0.021747 | 1.662605333 |
| dmx12            | ENSDARG00000091293 | 12.21666667 | 26.52       | 0.460659 | -1.1182301 | 0.040682 | 1.390601101 |
| dnajb12a         | ENSDARG00000039363 | 20.81       | 15.93333333 | 1.306067 | 0.3852288  | 0.022624 | 1.645439091 |
| dnajb6b          | ENSDARG00000020953 | 14.70333333 | 10.94333333 | 1.343588 | 0.426091   | 0.008235 | 2.084345713 |
| DNAJC11 (2 of 2) | ENSDARG00000102696 | 4.633333333 | 7.226666667 | 0.641144 | -0.6412799 | 0.048194 | 1.317004116 |
| dnajc16l         | ENSDARG00000060725 | 12.65       | 7.873333333 | 1.606689 | 0.6840909  | 0.043896 | 1.357572762 |
| dnajc18          | ENSDARG00000056005 | 14.35333333 | 17.81       | 0.805914 | -0.3113017 | 0.049864 | 1.302215027 |
| dnajc19          | ENSDARG00000044420 | 28.17333333 | 20.07666667 | 1.403287 | 0.4888105  | 0.019938 | 1.700313506 |
| dnajc5aa         | ENSDARG00000042948 | 9.373333333 | 28.24666667 | 0.331839 | -1.5914465 | 0.015534 | 1.808720406 |
| dnajc6           | ENSDARG00000079891 | 10.12333333 | 15.27333333 | 0.662811 | -0.5933306 | 0.046088 | 1.336414857 |
| dnajc7           | ENSDARG00000058148 | 25.24333333 | 34.94       | 0.722477 | -0.4689772 | 0.030479 | 1.515999025 |
| dnajc8           | ENSDARG00000059373 | 29.12       | 51.36666667 | 0.566905 | -0.8188221 | 0.003494 | 2.456692093 |
| dnajc9           | ENSDARG00000031293 | 52.13       | 33.98333333 | 1.533987 | 0.6172865  | 0.004482 | 2.348532894 |
| dnlz             | ENSDARG00000068655 | 7.396666667 | 4.103333333 | 1.8026   | 0.8500789  | 0.044969 | 1.34708411  |
| dnph1            | ENSDARG00000075730 | 19.42       | 8.106666667 | 2.395559 | 1.2603625  | 0.004472 | 2.349515407 |
| dock10           | ENSDARG00000075327 | 1.956666667 | 3.23        | 0.605779 | -0.7231362 | 0.042874 | 1.367809666 |
| dock11           | ENSDARG00000062485 | 6.443333333 | 4.326666667 | 1.489214 | 0.5745513  | 0.006837 | 2.165134675 |
| dpf2l            | ENSDARG00000037291 | 61.04666667 | 37.16       | 1.642806 | 0.716162   | 0.046976 | 1.328128188 |
| dph5             | ENSDARG00000100242 | 6.776666667 | 10.09666667 | 0.671179 | -0.5752314 | 0.004276 | 2.369010514 |

|                  |                    |             |             |          |            |          |             |
|------------------|--------------------|-------------|-------------|----------|------------|----------|-------------|
| dpp3             | ENSDARG00000020676 | 28.94       | 19.65       | 1.472774 | 0.5585356  | 0.043537 | 1.36113653  |
| dpp6b            | ENSDARG00000024744 | 9.34        | 13.63       | 0.685253 | -0.5452911 | 0.021128 | 1.675150532 |
| dpp9             | ENSDARG00000052606 | 5.983333333 | 12.31333333 | 0.485923 | -1.0412    | 0.034146 | 1.466654668 |
| dpy30            | ENSDARG00000004427 | 147.3633333 | 108.4733333 | 1.358521 | 0.4420372  | 0.022731 | 1.643373852 |
| dpysl5b          | ENSDARG00000059311 | 24.42333333 | 55.12       | 0.443094 | -1.1743158 | 0.010386 | 1.983537326 |
| dus4l            | ENSDARG00000006567 | 6.706666667 | 3.676666667 | 1.824116 | 0.8671975  | 0.016693 | 1.777456987 |
| DUSP18           | ENSDARG00000078598 | 2.066666667 | 2.99        | 0.691193 | -0.5328398 | 0.030619 | 1.514002563 |
| dvl2             | ENSDARG00000056184 | 12.22666667 | 8.643333333 | 1.414578 | 0.5003714  | 0.005901 | 2.229081775 |
| dynll1           | ENSDARG00000058454 | 380.2433333 | 473.6433333 | 0.802805 | -0.3168781 | 0.020627 | 1.685564933 |
| dyrk1ab          | ENSDARG00000023814 | 9.553333333 | 12.83333333 | 0.744416 | -0.4258198 | 0.023403 | 1.63072379  |
| DYRK3            | ENSDARG00000070600 | 13.55333333 | 19.04666667 | 0.711586 | -0.4908908 | 0.015297 | 1.815405897 |
| e4f1             | ENSDARG00000038243 | 3.626666667 | 4.98        | 0.728246 | -0.4575016 | 0.046206 | 1.335305081 |
| eci2             | ENSDARG00000102412 | 20.90666667 | 30.56       | 0.684119 | -0.5476815 | 0.019873 | 1.701733931 |
| edrf1            | ENSDARG00000019834 | 1.383333333 | 2.14        | 0.646417 | -0.629462  | 0.034643 | 1.460379261 |
| eef1a1a          | ENSDARG00000039502 | 18.31       | 24.35333333 | 0.751848 | -0.4114875 | 0.027941 | 1.553765354 |
| eef1a1l1         | ENSDARG00000020850 | 6321.026667 | 4978.55     | 1.269652 | 0.3444333  | 0.032177 | 1.492454086 |
| eef1g            | ENSDARG00000056119 | 1582.993333 | 1242.503333 | 1.274035 | 0.3494055  | 0.011217 | 1.950129855 |
| efnb2a           | ENSDARG00000020164 | 15.92333333 | 23.25666667 | 0.684678 | -0.546502  | 0.02039  | 1.69057242  |
| egr1             | ENSDARG00000037421 | 14.98666667 | 26.38       | 0.568107 | -0.815765  | 0.028268 | 1.548701172 |
| EGR4             | ENSDARG00000077799 | 2.543333333 | 7.293333333 | 0.34872  | -1.5198578 | 0.000156 | 3.808172892 |
| EHBP1L1 (1 of 2) | ENSDARG00000057353 | 10.29       | 3.596666667 | 2.860982 | 1.5165106  | 0.013735 | 1.862165125 |
| ehd1a            | ENSDARG00000098853 | 15.37       | 8.473333333 | 1.813926 | 0.8591156  | 0.023761 | 1.62413913  |
| eif1axb          | ENSDARG00000057912 | 173.8633333 | 140.9633333 | 1.233394 | 0.3026338  | 0.01093  | 1.961383674 |
| eif1b            | ENSDARG00000012688 | 438.7166667 | 499.8866667 | 0.877632 | -0.1883115 | 0.020689 | 1.684255041 |
| eif3ba           | ENSDARG00000059654 | 199.8433333 | 146.9533333 | 1.35991  | 0.4435114  | 0.003016 | 2.520537796 |
| eif3k            | ENSDARG00000068289 | 199.49      | 113.4833333 | 1.757879 | 0.813836   | 0.002154 | 2.666854146 |
| eif4a2           | ENSDARG00000016477 | 12.83666667 | 19.48333333 | 0.658854 | -0.6019699 | 0.000188 | 3.726627906 |
| eif4ba           | ENSDARG00000017439 | 10.12333333 | 15.13       | 0.66909  | -0.5797276 | 0.003547 | 2.450190054 |
| eif4ebp1         | ENSDARG00000043608 | 122.0533333 | 87.43333333 | 1.395959 | 0.4812564  | 0.01132  | 1.946160629 |
| eif4ebp2         | ENSDARG00000031819 | 162.2333333 | 119.77      | 1.354541 | 0.4378037  | 0.001973 | 2.704779295 |
| ell              | ENSDARG00000000568 | 7.576666667 | 9.333333333 | 0.811786 | -0.3008291 | 0.009808 | 2.008433997 |
| elmo1            | ENSDARG00000098753 | 32.55333333 | 54.15       | 0.60117  | -0.7341561 | 0.035036 | 1.455485968 |
| elmo2            | ENSDARG00000063527 | 10.96666667 | 20.25333333 | 0.541475 | -0.8850343 | 0.017039 | 1.768551014 |
| elovl2           | ENSDARG00000045414 | 1.22        | 2.296666667 | 0.531205 | -0.9126603 | 0.011803 | 1.928000043 |
| elovl4b          | ENSDARG00000027495 | 37.7        | 92.43       | 0.407876 | -1.2937967 | 0.011764 | 1.929441587 |
| elp4             | ENSDARG00000008852 | 2.146666667 | 3.616666667 | 0.593548 | -0.7525624 | 0.02904  | 1.536997935 |
| EMC4 (2 of 2)    | ENSDARG00000102733 | 0           | 94.26333333 | 0.010497 | -6.5738491 | 0.044302 | 1.353572946 |
| eml1             | ENSDARG00000042840 | 6.93        | 15.43       | 0.449125 | -1.1548108 | 0.002622 | 2.581446566 |
| EML5             | ENSDARG00000053517 | 1.566666667 | 3.566666667 | 0.439252 | -1.1868781 | 0.002965 | 2.527997575 |
| EML6             | ENSDARG00000102755 | 4.15        | 7.186666667 | 0.577458 | -0.7922114 | 0.007873 | 2.103851378 |
| enah             | ENSDARG00000032049 | 10.74       | 14.03666667 | 0.765139 | -0.3862064 | 0.005028 | 2.298646012 |
| ENDOD1 (7 of 12) |                    | 175.5633333 | 124.58      | 1.409242 | 0.4949191  | 0.035065 | 1.455126307 |
| endog            | ENSDARG00000058865 | 17.74333333 | 13.62       | 1.302741 | 0.3815504  | 0.0326   | 1.486782549 |
| eno1b            | ENSDARG00000013750 | 11.18       | 22.25333333 | 0.502397 | -0.9931013 | 0.040173 | 1.396070904 |
| eno2             | ENSDARG00000014287 | 60.33       | 103.0866667 | 0.585236 | -0.7729103 | 0.049342 | 1.306783814 |
| entpd4           | ENSDARG00000038422 | 1.363333333 | 3.946666667 | 0.345439 | -1.5334963 | 0.038674 | 1.412582847 |
| epb4l13a         | ENSDARG0000002255  | 19.43       | 31.63666667 | 0.614161 | -0.7033117 | 0.019553 | 1.70878367  |
| epc1a            | ENSDARG00000101579 | 14.63333333 | 18.45666667 | 0.792848 | -0.3348836 | 0.047992 | 1.318835161 |
| epc1b            | ENSDARG00000060054 | 10.10333333 | 15.49333333 | 0.652108 | -0.6168162 | 0.033401 | 1.476240655 |
| epha8            | ENSDARG00000023609 | 1.336666667 | 3.25        | 0.411282 | -1.2818    | 0.03361  | 1.473534597 |
| ephb6            | ENSDARG00000057729 | 0.62        | 2.063333333 | 0.300485 | -1.7346368 | 0.035303 | 1.452188041 |
| eps8             | ENSDARG00000102128 | 1.94        | 4.27        | 0.454333 | -1.1381794 | 0.038781 | 1.411377455 |
| ercc2            | ENSDARG00000021985 | 4.68        | 6.066666667 | 0.771429 | -0.3743955 | 0.029543 | 1.529547527 |
| ercc3            | ENSDARG0000002402  | 5.203333333 | 7.1         | 0.732864 | -0.4483829 | 0.045335 | 1.34357087  |



|                  |                    |             |             |          |            |          |             |
|------------------|--------------------|-------------|-------------|----------|------------|----------|-------------|
| exoc2            | ENSDARG00000055610 | 21.59666667 | 16.12       | 1.339744 | 0.4219569  | 0.024042 | 1.619030641 |
| exoc3            | ENSDARG00000014582 | 11.58666667 | 16.03       | 0.722811 | -0.4683088 | 0.041919 | 1.377584041 |
| eya1             | ENSDARG00000014259 | 13.32666667 | 10.53666667 | 1.26479  | 0.3388974  | 0.044255 | 1.354036532 |
| F8A2             |                    | 13.97       | 16.81       | 0.831053 | -0.2669877 | 0.016102 | 1.793128039 |
| fabp7a           | ENSDARG00000007697 | 1687.13     | 1997.526667 | 0.84461  | -0.2436436 | 0.030787 | 1.511634716 |
| faimb            | ENSDARG00000020814 | 6.406666667 | 25.04333333 | 0.255823 | -1.9667808 | 0.028135 | 1.550753986 |
| FAM126B (2 of 2) | ENSDARG00000101696 | 0.89        | 2.756666667 | 0.322854 | -1.6310476 | 0.02291  | 1.639980839 |
| fam131ba         | ENSDARG00000070952 | 1.463333333 | 4.413333333 | 0.331571 | -1.5926103 | 0.00654  | 2.184444081 |
| FAM163A (1 of 2) | ENSDARG00000077470 | 0.383333333 | 2.426666667 | 0.157967 | -2.6623046 | 0.02228  | 1.652093076 |
| fam184a          | ENSDARG00000014081 | 4.846666667 | 6.76        | 0.716963 | -0.4800304 | 0.020387 | 1.690648062 |
| fam196ab         | ENSDARG00000104465 | 0.16        | 2.78        | 0.057554 | -4.1189411 | 0.001371 | 2.863067107 |
| fam207a          | ENSDARG00000093061 | 9.14        | 5.51        | 1.658802 | 0.7301418  | 0.000438 | 3.358840427 |
| fam43a           | ENSDARG00000043009 | 16.69       | 26.50666667 | 0.629653 | -0.6673713 | 0.042166 | 1.375037309 |
| fam83d           | ENSDARG00000077883 | 4.29        | 2.943333333 | 1.457531 | 0.5435267  | 0.050097 | 1.300188831 |
| fam91a1          | ENSDARG00000003320 | 7.943333333 | 13.12666667 | 0.60513  | -0.7246842 | 0.000734 | 3.134430391 |
| fam92a1          | ENSDARG00000004436 | 14.50666667 | 10.59666667 | 1.368984 | 0.4531055  | 0.044268 | 1.353913719 |
| farp2            | ENSDARG00000016429 | 8.376666667 | 5.963333333 | 1.404695 | 0.4902573  | 0.002253 | 2.647167954 |
| faub             | ENSDARG00000043663 | 16.7        | 8.68        | 1.923963 | 0.9440812  | 0.015111 | 1.820696328 |
| fbxl2            | ENSDARG00000012135 | 1.74        | 5.54        | 0.314079 | -1.6707987 | 0.002146 | 2.668470345 |
| FBXO46           | ENSDARG00000099814 | 5.086666667 | 7.4         | 0.687387 | -0.5408047 | 0.011592 | 1.935855413 |
| fbxw11a          | ENSDARG00000104806 | 8.426666667 | 13.72333333 | 0.614039 | -0.703597  | 0.004649 | 2.332642236 |
| fbxw11b          | ENSDARG00000017230 | 15.19       | 24.21       | 0.627427 | -0.6724812 | 0.007077 | 2.150180185 |
| fdps             | ENSDARG00000040890 | 24.77333333 | 30.40666667 | 0.814734 | -0.2955997 | 0.019163 | 1.717545491 |
| fem1c            | ENSDARG00000102147 | 12.97666667 | 16.34       | 0.794166 | -0.3324881 | 0.036763 | 1.434588659 |
| fen1             | ENSDARG00000011404 | 29.45333333 | 23.24666667 | 1.266992 | 0.3414071  | 0.027773 | 1.556372809 |
| fez1             | ENSDARG00000023174 | 163.44      | 133.11      | 1.227857 | 0.2961422  | 0.036014 | 1.443533828 |
| fezf2            | ENSDARG00000070677 | 12.61666667 | 26.97666667 | 0.467688 | -1.0963813 | 0.006389 | 2.194561853 |
| fgd5a            | ENSDARG00000088801 | 2.156666667 | 1.766666667 | 1.220755 | 0.2877734  | 0.045789 | 1.339241288 |
| fgf11b           | ENSDARG00000043907 | 0.923333333 | 2.473333333 | 0.373315 | -1.4215332 | 0.023168 | 1.635115869 |
| fgf13b           | ENSDARG00000056633 | 20.92666667 | 35.55333333 | 0.588599 | -0.7646423 | 0.045213 | 1.344738783 |
| fgfr2            | ENSDARG00000058115 | 37.60666667 | 29.59       | 1.270925 | 0.3458787  | 0.002942 | 2.531424288 |
| FGL1             | ENSDARG00000057004 | 2.223333333 | 0.776666667 | 2.862661 | 1.5173568  | 0.010536 | 1.977319356 |
| fhl1b            | ENSDARG00000056653 | 9.803333333 | 5.206666667 | 1.882843 | 0.9129123  | 0.02466  | 1.608014818 |
| fkbp16           | ENSDARG00000001976 | 6.09        | 12.03333333 | 0.506094 | -0.9825222 | 0.008418 | 2.07481291  |
| fkbp1ab          | ENSDARG00000033567 | 26.59       | 10.38       | 2.561657 | 1.3570773  | 0.034618 | 1.460691764 |
| flnbl            | ENSDARG00000097351 | 26.59       | 14.31333333 | 1.857708 | 0.8935241  | 0.020035 | 1.698214641 |
| flot1a           | ENSDARG00000001710 | 55.06333333 | 40.03333333 | 1.375437 | 0.4598902  | 0.049616 | 1.304377736 |
| flot2b           | ENSDARG00000069774 | 21.99       | 26.87666667 | 0.818182 | -0.2895066 | 0.030426 | 1.516758132 |
| flrt2            | ENSDARG00000079355 | 1.613333333 | 2.446666667 | 0.659401 | -0.600773  | 0.024664 | 1.607934569 |
| fmnl3            | ENSDARG00000004372 | 9.956666667 | 6.356666667 | 1.566335 | 0.6473924  | 0.014174 | 1.848514705 |
| FO704863.2       | ENSDARG00000101523 | 0.976666667 | 2.343333333 | 0.416785 | -1.262624  | 0.01825  | 1.738737948 |
| fosl2            | ENSDARG00000040623 | 4.613333333 | 8.873333333 | 0.51991  | -0.9436666 | 0.017453 | 1.75812783  |
| foxd1            | ENSDARG00000029179 | 11.66666667 | 7.38        | 1.580849 | 0.6606997  | 0.021145 | 1.674795889 |
| foxg1a           | ENSDARG00000070769 | 7.54        | 15.34666667 | 0.491312 | -1.0252889 | 0.00841  | 2.075225092 |
| foxg1d           | ENSDARG00000070053 | 1.343333333 | 3.503333333 | 0.383444 | -1.3829109 | 0.028624 | 1.54326358  |
| foxk2            | ENSDARG00000030583 | 16.78333333 | 28.17       | 0.595787 | -0.7471303 | 0.022484 | 1.648133639 |
| FP103009.1       | ENSDARG00000116341 | 10.73333333 | 14.21       | 0.755337 | -0.4048084 | 0.006082 | 2.215931265 |
| FQ311894.1       | ENSDARG00000101858 | 5.18        | 9.25        | 0.56     | -0.8365013 | 0.036599 | 1.436531839 |
| FQ377629.1       | ENSDARG00000104339 | 1.506666667 | 3.08        | 0.489177 | -1.0315701 | 0.023514 | 1.628670581 |
| FRG1             | ENSDARG00000056504 | 43.67       | 28.57       | 1.528526 | 0.6121415  | 0.012119 | 1.916540327 |
| FRMD1 (1 of 2)   | ENSDARG00000078741 | 11.16666667 | 7.14        | 1.563959 | 0.6452026  | 0.031467 | 1.502138551 |
| fstl1a           | ENSDARG00000015559 | 8.786666667 | 3.816666667 | 2.302183 | 1.2030028  | 0.024443 | 1.611845696 |
| fstl5            | ENSDARG00000040198 | 15.78666667 | 31.03666667 | 0.508646 | -0.975267  | 0.00397  | 2.401184685 |
| fut8a            | ENSDARG00000015449 | 15.63333333 | 24.62       | 0.634985 | -0.6552053 | 0.047003 | 1.32787732  |

|                 |                    |             |             |          |            |          |             |
|-----------------|--------------------|-------------|-------------|----------|------------|----------|-------------|
| fut9a           | ENSDARG00000016460 | 3.603333333 | 5.983333333 | 0.602228 | -0.7316173 | 0.028266 | 1.548742814 |
| fyna            | ENSDARG00000011370 | 26.80666667 | 37.23666667 | 0.7199   | -0.4741321 | 0.046762 | 1.330110777 |
| fzd8a           | ENSDARG00000045444 | 11.99333333 | 9.813333333 | 1.222147 | 0.2894175  | 0.02211  | 1.655412512 |
| fzr1a           | ENSDARG00000015254 | 37.02       | 28.51333333 | 1.29834  | 0.3766682  | 0.024783 | 1.605844373 |
| fzr1b           | ENSDARG00000022810 | 16.97666667 | 23.09666667 | 0.735027 | -0.4441314 | 0.01666  | 1.778319909 |
| GABARAPL1       | ENSDARG00000040971 | 232.3733333 | 122.0866667 | 1.903347 | 0.9285389  | 0.002784 | 2.55537088  |
| gabpb2a         | ENSDARG00000007943 | 8.536666667 | 6.216666667 | 1.37319  | 0.4575316  | 0.023973 | 1.620271904 |
| gabra6a         | ENSDARG00000075058 | 1.073333333 | 4.263333333 | 0.251759 | -1.9898837 | 0.007743 | 2.111092198 |
| gabrb3          | ENSDARG00000023771 | 6.756666667 | 18.1        | 0.373297 | -1.4216061 | 0.009437 | 2.025185178 |
| gabrr1          | ENSDARG00000043902 | 0.756666667 | 2.853333333 | 0.265187 | -1.9149185 | 0.023672 | 1.625765212 |
| GABRR1 (2 of 2) | ENSDARG00000098081 | 2.44        | 5.726666667 | 0.426077 | -1.2308145 | 0.018592 | 1.73066647  |
| gad1b           | ENSDARG00000027419 | 37.74       | 54.89333333 | 0.687515 | -0.5405365 | 0.018333 | 1.736770713 |
| gadd45ga        | ENSDARG00000019417 | 33.01666667 | 42.96333333 | 0.768485 | -0.3799115 | 0.015798 | 1.801392429 |
| gapvd1          | ENSDARG00000090183 | 2.636666667 | 3.896666667 | 0.676647 | -0.5635253 | 0.048372 | 1.315403835 |
| gas1b           | ENSDARG00000067984 | 17.66333333 | 9.58        | 1.843772 | 0.8826601  | 0.000607 | 3.217137194 |
| GATC            | ENSDARG00000056855 | 31.78666667 | 21.81       | 1.457435 | 0.543432   | 0.02732  | 1.56352078  |
| gbas            |                    | 49.44666667 | 67.79333333 | 0.729374 | -0.4552701 | 0.014762 | 1.830850556 |
| gbf1            | ENSDARG00000027016 | 4.56        | 6.263333333 | 0.728047 | -0.4578968 | 0.001944 | 2.71125729  |
| gcfc2           | ENSDARG00000079020 | 4.61        | 2.983333333 | 1.545251 | 0.6278416  | 0.028971 | 1.538031982 |
| gdap1           | ENSDARG00000058601 | 7.9         | 11.56333333 | 0.683194 | -0.5496328 | 0.011037 | 1.957150596 |
| gdf3            | ENSDARG00000037995 | 0.856666667 | 3.133333333 | 0.273404 | -1.8708924 | 0.000335 | 3.475559534 |
| gdpd5b          | ENSDARG00000076962 | 7.973333333 | 10.99333333 | 0.725288 | -0.463374  | 0.006267 | 2.202912208 |
| gem             | ENSDARG00000029112 | 3.47        | 7.84        | 0.442602 | -1.175918  | 0.038176 | 1.418207205 |
| gemin2          | ENSDARG00000015638 | 37.34       | 21.62666667 | 1.726572 | 0.7879106  | 0.020081 | 1.69721082  |
| GEN1            | ENSDARG00000012325 | 13.36666667 | 7.343333333 | 1.820245 | 0.8641327  | 0.043032 | 1.366207789 |
| gfap            | ENSDARG00000025301 | 103.3333333 | 75.75       | 1.364136 | 0.4479879  | 0.003809 | 2.4191962   |
| gfra4a          | ENSDARG00000056651 | 0.93        | 2.006666667 | 0.463455 | -1.1094984 | 0.03044  | 1.516549846 |
| gga1            | ENSDARG00000038537 | 12.11333333 | 14.16333333 | 0.85526  | -0.2255649 | 0.035366 | 1.451412299 |
| ggps1           | ENSDARG00000023627 | 7.55        | 12.20333333 | 0.618683 | -0.6927267 | 0.040006 | 1.397877134 |
| gins1           | ENSDARG00000007624 | 11.44333333 | 7.123333333 | 1.606458 | 0.6838829  | 0.044599 | 1.3506788   |
| gkap1           | ENSDARG00000068123 | 17.82333333 | 24.39666667 | 0.730564 | -0.4529169 | 0.000478 | 3.32065878  |
| glo1            | ENSDARG00000068978 | 105.28      | 57.78666667 | 1.821874 | 0.8654228  | 0.037833 | 1.422132447 |
| glod4           | ENSDARG00000042509 | 6.276666667 | 4.77        | 1.315863 | 0.3960093  | 0.026311 | 1.579860132 |
| glra4b          | ENSDARG00000058103 | 2.673333333 | 5.266666667 | 0.507595 | -0.9782504 | 0.043637 | 1.360144141 |
| glrx3           | ENSDARG00000098785 | 50.66333333 | 62.7        | 0.808028 | -0.3075234 | 0.019846 | 1.702321402 |
| gltscr1         | ENSDARG00000061159 | 4.586666667 | 6.783333333 | 0.676167 | -0.5645483 | 0.026706 | 1.57338989  |
| gmppb           | ENSDARG00000017658 | 28.28333333 | 24.35666667 | 1.161215 | 0.2156355  | 0.008842 | 2.053435949 |
| gnai1           | ENSDARG00000021647 | 32.65666667 | 42.3        | 0.772025 | -0.3732801 | 0.02591  | 1.586533779 |
| gnai2b          | ENSDARG00000017294 | 17.01       | 27.19333333 | 0.625521 | -0.6768699 | 0.002243 | 2.649183518 |
| gnaia           | ENSDARG00000044760 | 25.60666667 | 15.64666667 | 1.636557 | 0.7106641  | 0.006244 | 2.204549649 |
| gnao1a          | ENSDARG00000016676 | 45.37       | 82.57666667 | 0.549429 | -0.8639955 | 0.018364 | 1.736042271 |
| gnao1b          | ENSDARG00000036058 | 56.68       | 119.22      | 0.475424 | -1.0727146 | 0.007716 | 2.11259775  |
| gnat2           | ENSDARG00000042529 | 71.57333333 | 273.6       | 0.261598 | -1.9345742 | 0.006246 | 2.204386528 |
| gnb2            | ENSDARG00000035357 | 14.85       | 30.53333333 | 0.486354 | -1.0399222 | 0.016138 | 1.792154411 |
| gnb2l1          |                    | 2617.763333 | 2018.656667 | 1.296785 | 0.3749391  | 0.024483 | 1.611134856 |
| gnb3a           | ENSDARG00000004358 | 114.22      | 143.92      | 0.793635 | -0.3334518 | 0.009782 | 2.009590174 |
| gnb3b           | ENSDARG00000002696 | 103.25      | 317.32      | 0.325381 | -1.6197967 | 0.024877 | 1.604204727 |
| gne             | ENSDARG00000099771 | 10.60666667 | 8.62        | 1.230472 | 0.2992116  | 0.022492 | 1.64798008  |
| ngng13b         | ENSDARG00000037921 | 94.43333333 | 139.75      | 0.67573  | -0.5654802 | 0.004335 | 2.36298664  |
| ngng5           | ENSDARG00000039830 | 158.6833333 | 130.5633333 | 1.215374 | 0.2814008  | 0.003362 | 2.47338583  |
| ngngt2b         | ENSDARG00000103543 | 383.22      | 1558.94     | 0.245821 | -2.0243206 | 0.00712  | 2.147525768 |
| golga4          | ENSDARG00000075331 | 2.886666667 | 4.356666667 | 0.662586 | -0.5938202 | 0.019071 | 1.719633061 |
| gorasp2         | ENSDARG00000015126 | 27.77333333 | 40.14666667 | 0.691797 | -0.5315799 | 0.007424 | 2.129377988 |
| gosr1           | ENSDARG00000026654 | 16.94       | 20.64666667 | 0.820471 | -0.285475  | 0.005726 | 2.242173495 |

|               |                    |               |              |          |            |          |             |
|---------------|--------------------|---------------|--------------|----------|------------|----------|-------------|
| GPC6 (2 of 3) | ENSDARG00000103156 | 0.92          | 4.026666667  | 0.228477 | -2.1298803 | 0.006127 | 2.212744791 |
| gphnb         | ENSDARG00000100851 | 16.996666667  | 29.066666667 | 0.584748 | -0.7741138 | 0.028394 | 1.546769785 |
| gpr107        | ENSDARG00000103200 | 19.863333333  | 23.19        | 0.856547 | -0.2233951 | 0.001618 | 2.791013938 |
| gpr146        | ENSDARG00000059610 | 12.786666667  | 19.296666667 | 0.662636 | -0.5937114 | 0.040557 | 1.391930536 |
| gpr63         | ENSDARG00000074540 | 7.413333333   | 9.353333333  | 0.792587 | -0.3353582 | 0.008507 | 2.070232789 |
| gpr75         | ENSDARG00000098526 | 7.023333333   | 13.86        | 0.506734 | -0.9806994 | 0.012603 | 1.899515751 |
| gpx1b         | ENSDARG00000006207 | 15.5          | 11.166666667 | 1.38806  | 0.4730696  | 0.045936 | 1.33784645  |
| gria1a        | ENSDARG00000021352 | 1.913333333   | 3.556666667  | 0.537957 | -0.8944375 | 0.041693 | 1.379941347 |
| gria3b        | ENSDARG00000037498 | 6.64          | 12.276666667 | 0.540863 | -0.8866638 | 0.041309 | 1.383958459 |
| grid1a        | ENSDARG00000074583 | 2.283333333   | 3.656666667  | 0.62443  | -0.6793876 | 0.042708 | 1.369489231 |
| grik1a        | ENSDARG00000069139 | 1.966666667   | 3.886666667  | 0.506003 | -0.9827809 | 0.000794 | 3.100252968 |
| grik4         | ENSDARG00000026753 | 1.3           | 3.183333333  | 0.408377 | -1.2920266 | 0.000881 | 3.055127357 |
| grin2aa       | ENSDARG00000034493 | 1.766666667   | 3.303333333  | 0.534813 | -0.9028927 | 0.026704 | 1.573417934 |
| grinab        | ENSDARG00000052746 | 19.653333333  | 30.636666667 | 0.641497 | -0.6404853 | 5.23E-05 | 4.28191382  |
| grk1a         | ENSDARG00000058803 | 1.946666667   | 4.616666667  | 0.421661 | -1.2458457 | 0.022881 | 1.640523861 |
| grk4          | ENSDARG00000070448 | 3.736666667   | 6.606666667  | 0.56559  | -0.8221707 | 0.026788 | 1.572060383 |
| grm2a         | ENSDARG00000004150 | 4.616666667   | 7.813333333  | 0.59087  | -0.7590866 | 0.036991 | 1.431899741 |
| grm8b         | ENSDARG00000076508 | 2.24          | 5.103333333  | 0.438929 | -1.1879411 | 0.025612 | 1.591559384 |
| gskip         | ENSDARG00000038099 | 53.196666667  | 39.026666667 | 1.363085 | 0.4468756  | 0.033914 | 1.469625193 |
| gsna          | ENSDARG00000011459 | 5.406666667   | 3.17         | 1.705573 | 0.7702566  | 0.043773 | 1.358797547 |
| gstm          | ENSDARG00000042533 | 101.546666667 | 58.78        | 1.727572 | 0.7887456  | 0.002419 | 2.616365603 |
| gtf2h1        | ENSDARG00000026701 | 6.606666667   | 9.813333333  | 0.673234 | -0.5708207 | 0.023495 | 1.629021379 |
| gtf2h3        | ENSDARG00000067560 | 23.456666667  | 12.546666667 | 1.869554 | 0.9026939  | 0.006011 | 2.221075022 |
| gtf2h5        | ENSDARG00000056099 | 61.616666667  | 47.27        | 1.303505 | 0.3823958  | 0.028379 | 1.546998282 |
| guca1b        | ENSDARG00000013393 | 1.076666667   | 2.733333333  | 0.393902 | -1.3440897 | 0.019856 | 1.702098495 |
| gusb          | ENSDARG00000063126 | 2.733333333   | 5.276666667  | 0.518004 | -0.9489654 | 0.045377 | 1.343161337 |
| h3f3a         | ENSDARG00000020504 | 3099.3466667  | 1833.6633333 | 1.690248 | 0.7572354  | 0.026454 | 1.577515106 |
| hacd2         | ENSDARG00000014806 | 52.5          | 77.36        | 0.678645 | -0.5592704 | 0.001191 | 2.923934352 |
| hagh          | ENSDARG00000025338 | 6.683333333   | 11.426666667 | 0.584889 | -0.7737649 | 0.019543 | 1.708999063 |
| hamp          | ENSDARG00000102175 | 0.343333333   | 3.72         | 0.092294 | -3.4376208 | 0.006597 | 2.180681393 |
| HAP1          | ENSDARG00000074508 | 3.82          | 8.956666667  | 0.426498 | -1.2293893 | 0.001346 | 2.871085687 |
| haus5         | ENSDARG00000019156 | 1.626666667   | 2.34         | 0.695157 | -0.5245899 | 0.000315 | 3.501741294 |
| hbae1         | ENSDARG00000089475 | 48.13         | 3.503333333  | 13.73834 | 3.7801363  | 0.000758 | 3.120207303 |
| hbae1         | ENSDARG00000089475 | 478.0833333   | 170.7866667  | 2.799301 | 1.4850668  | 0.01209  | 1.917579087 |
| hbbe1.1       | ENSDARG00000087390 | 3694.85       | 1298.66      | 2.845125 | 1.508492   | 0.001499 | 2.824244455 |
| hddc3         | ENSDARG00000020473 | 27.113333333  | 17.673333333 | 1.534138 | 0.6174283  | 0.003264 | 2.486314829 |
| her15.2       | ENSDARG00000054560 | 51.59         | 12.306666667 | 4.192037 | 2.0676514  | 0.010967 | 1.959898688 |
| her4.2        | ENSDARG00000056729 | 34.5          | 13.023333333 | 2.649091 | 1.4054976  | 0.037404 | 1.427081681 |
| herc1         | ENSDARG00000077901 | 5.096666667   | 6.76         | 0.753945 | -0.4074692 | 0.034924 | 1.456881758 |
| hexb          | ENSDARG00000034368 | 19.52         | 25.923333333 | 0.75299  | -0.4092982 | 0.026025 | 1.584601742 |
| hhat1b        | ENSDARG00000005139 | 16.933333333  | 4.196666667  | 4.034948 | 2.0125502  | 0.001722 | 2.764087712 |
| higd1a        | ENSDARG00000022303 | 19.986666667  | 32.516666667 | 0.614659 | -0.7021415 | 0.000229 | 3.639429985 |
| hinfp         | ENSDARG00000004851 | 5.186666667   | 3.963333333  | 1.308663 | 0.3880933  | 0.046109 | 1.336215523 |
| hip1          | ENSDARG00000062972 | 4.943333333   | 7.89         | 0.626531 | -0.6745411 | 0.013647 | 1.86497464  |
| hip1ra        | ENSDARG00000077445 | 1.046666667   | 2.393333333  | 0.437326 | -1.1932193 | 0.020333 | 1.691806061 |
| hk1           | ENSDARG00000039452 | 16.693333333  | 35.726666667 | 0.467251 | -1.0977293 | 0.008547 | 2.068192619 |
| hlfa          | ENSDARG00000074752 | 4.69          | 8.593333333  | 0.545772 | -0.8736299 | 0.041347 | 1.38355532  |
| hmbsa         | ENSDARG00000008840 | 11.493333333  | 5.41         | 2.124461 | 1.0870968  | 0.021229 | 1.673068268 |
| hmga1b        | ENSDARG00000070951 | 24.33         | 50.63        | 0.480545 | -1.0572562 | 0.046393 | 1.33354957  |
| hmgb3b        | ENSDARG00000006408 | 58.68         | 40.993333333 | 1.431452 | 0.5174796  | 0.039233 | 1.406353843 |
| hmgcra        | ENSDARG00000052734 | 3.193333333   | 7.213333333  | 0.442699 | -1.1756029 | 0.029967 | 1.523351232 |
| hmx2          | ENSDARG00000070954 | 15.113333333  | 7.89         | 1.915505 | 0.9377247  | 0.017284 | 1.762364816 |
| hmx4          | ENSDARG00000007941 | 17.68         | 25.943333333 | 0.681485 | -0.5532456 | 0.032286 | 1.490983041 |
| hnrnpk        | ENSDARG00000018914 | 33.16         | 54.41        | 0.609447 | -0.7144278 | 0.012149 | 1.915447689 |

|               |                    |             |             |          |            |          |             |
|---------------|--------------------|-------------|-------------|----------|------------|----------|-------------|
| hnrnpul1      | ENSDARG00000040564 | 9.43        | 30.55666667 | 0.308607 | -1.6961575 | 0.000292 | 3.53523624  |
| hnrnpul1l     | ENSDARG00000079780 | 12.97333333 | 84.63333333 | 0.153289 | -2.7056768 | 8.12E-05 | 4.090227134 |
| homer1b       | ENSDARG00000101759 | 14.27333333 | 19.37       | 0.736878 | -0.4405017 | 0.030895 | 1.510116914 |
| hoxa2b        | ENSDARG00000023031 | 7.466666667 | 4.003333333 | 1.865112 | 0.8992626  | 0.002685 | 2.571012498 |
| hoxa9b        | ENSDARG00000056819 | 12.54333333 | 7.363333333 | 1.703486 | 0.7684899  | 0.025634 | 1.591181742 |
| hoxb6a        | ENSDARG00000010630 | 12.03333333 | 9.643333333 | 1.24784  | 0.3194325  | 0.04596  | 1.337620668 |
| hoxb6b        | ENSDARG00000026513 | 51.22       | 28.76       | 1.780946 | 0.8326436  | 0.029114 | 1.535898859 |
| hoxb9a        | ENSDARG00000056023 | 22.13       | 13.20333333 | 1.676092 | 0.7451013  | 0.042933 | 1.36720443  |
| hoxc3a        | ENSDARG00000070339 | 24.02       | 16.57       | 1.449608 | 0.5356625  | 0.049463 | 1.305716272 |
| hpda          | ENSDARG00000018351 | 1.143333333 | 3.993333333 | 0.286311 | -1.8043474 | 0.003441 | 2.463271921 |
| hsbp11l       | ENSDARG00000075984 | 4.213333333 | 0.66        | 6.383838 | 2.6744241  | 0.028249 | 1.548994596 |
| hsf2          | ENSDARG00000053097 | 19.98       | 24.82       | 0.804996 | -0.3129465 | 0.023867 | 1.622211115 |
| hsp70.2       | ENSDARG00000092362 | 0.136666667 | 11.76333333 | 0.011618 | -6.4274917 | 0.008779 | 2.056560195 |
| hsp70.3       | ENSDARG00000021924 | 2.146666667 | 3.716666667 | 0.577578 | -0.7919111 | 0.00324  | 2.489475514 |
| hsp90aa1.2    | ENSDARG00000024746 | 43.42       | 89.27       | 0.48639  | -1.0398157 | 0.023829 | 1.622898328 |
| hspace4l      | ENSDARG00000053544 | 6.34        | 15.49       | 0.409296 | -1.2887824 | 0.029745 | 1.526588947 |
| htr2cl1       | ENSDARG00000018228 | 1.343333333 | 2.46        | 0.54607  | -0.872841  | 0.032245 | 1.491535608 |
| htt           | ENSDARG00000052866 | 2.86        | 4.553333333 | 0.628111 | -0.6709079 | 0.025432 | 1.594613219 |
| icmt          | ENSDARG00000020241 | 14.06333333 | 20.39666667 | 0.689492 | -0.5363948 | 0.045728 | 1.339817974 |
| id2a          | ENSDARG00000055283 | 171.0766667 | 216.0566667 | 0.791814 | -0.3367667 | 0.029025 | 1.537220554 |
| ier5l         | ENSDARG00000054906 | 33.73       | 48.63       | 0.693605 | -0.5278143 | 0.028264 | 1.548764854 |
| iffo1b        | ENSDARG00000062108 | 1.743333333 | 6.323333333 | 0.275698 | -1.8588368 | 0.03077  | 1.511871742 |
| igbp1         | ENSDARG00000002184 | 31.03       | 21.91333333 | 1.416033 | 0.5018547  | 0.031842 | 1.497001092 |
| igf2b         | ENSDARG00000033307 | 12.24666667 | 10.18666667 | 1.202225 | 0.2657071  | 0.024817 | 1.605248329 |
| igf2bp3       | ENSDARG00000010266 | 17.97       | 23.53666667 | 0.76349  | -0.3893196 | 0.020319 | 1.692093398 |
| igsf11        | ENSDARG00000017217 | 2.526666667 | 4.3         | 0.587597 | -0.7671013 | 0.007737 | 2.111453662 |
| igsf21a       | ENSDARG00000031049 | 4.186666667 | 10.91333333 | 0.383629 | -1.3822179 | 0.025191 | 1.598752917 |
| igsf21b       | ENSDARG00000056084 | 5.79        | 11.40666667 | 0.507598 | -0.978242  | 0.030405 | 1.517061102 |
| igsf5a        | ENSDARG00000087983 | 0.23        | 2.843333333 | 0.080891 | -3.6278775 | 0.038025 | 1.419935818 |
| illr1         | ENSDARG00000059254 | 0.806666667 | 2.976666667 | 0.270997 | -1.8836531 | 0.013197 | 1.879523439 |
| impdh1a       | ENSDARG00000042336 | 3.22        | 6.7         | 0.480597 | -1.0571004 | 0.023268 | 1.633244675 |
| inaa          | ENSDARG00000011862 | 3.316666667 | 7.803333333 | 0.425032 | -1.2343565 | 0.022645 | 1.645032341 |
| inhbb         | ENSDARG00000040777 | 12.83       | 6.766666667 | 1.896059 | 0.9230039  | 0.009157 | 2.03824363  |
| ino80e        | ENSDARG00000022939 | 2.716666667 | 1.983333333 | 1.369748 | 0.4539104  | 0.002375 | 2.624310714 |
| ins           | ENSDARG00000035350 | 0.703333333 | 3.49        | 0.201528 | -2.3109465 | 0.030182 | 1.520253406 |
| insm1b        | ENSDARG00000053301 | 14.6        | 22.36333333 | 0.652854 | -0.6151669 | 0.034984 | 1.456128632 |
| insra         | ENSDARG00000011948 | 4.906666667 | 6.986666667 | 0.70229  | -0.509861  | 0.015234 | 1.817194936 |
| ip6k2a        | ENSDARG00000008310 | 28.86333333 | 44.21       | 0.652869 | -0.6151348 | 0.003238 | 2.489719719 |
| ip6k2b        | ENSDARG00000019613 | 29.14333333 | 42.01       | 0.693724 | -0.5275669 | 0.041374 | 1.383271585 |
| ipmkb         | ENSDARG00000029291 | 4.966666667 | 7.456666667 | 0.666071 | -0.5862529 | 0.018394 | 1.735332807 |
| irbp          | ENSDARG00000059163 | 9.446666667 | 25.06333333 | 0.376912 | -1.407701  | 0.007046 | 2.152031812 |
| irf2bpl       | ENSDARG00000004297 | 36.95       | 60.62666667 | 0.609468 | -0.7143781 | 0.005597 | 2.252067587 |
| irx4b         | ENSDARG00000036051 | 4.82        | 7.32        | 0.65847  | -0.6028105 | 0.022211 | 1.653424874 |
| irx6a         | ENSDARG00000034420 | 5.33        | 9.896666667 | 0.538565 | -0.8928072 | 0.005099 | 2.292498714 |
| ISCU (2 of 2) | ENSDARG00000035596 | 88.83666667 | 57.42666667 | 1.546958 | 0.6294344  | 0.048959 | 1.310165008 |
| isl1          | ENSDARG00000004023 | 70.59666667 | 94.58       | 0.746423 | -0.4219351 | 0.014271 | 1.845530697 |
| itfg1         | ENSDARG00000103905 | 23.6        | 36.93666667 | 0.638932 | -0.6462668 | 0.0478   | 1.320572711 |
| itfg2         | ENSDARG00000002174 | 3.606666667 | 5.256666667 | 0.686113 | -0.5434822 | 0.017036 | 1.768625731 |
| itm2ca        | ENSDARG00000043448 | 44.14666667 | 85.49       | 0.516396 | -0.9534512 | 0.008386 | 2.076455621 |
| itm2cb        | ENSDARG00000039650 | 17.82666667 | 23.84       | 0.747763 | -0.4193473 | 0.025941 | 1.586010247 |
| itpa          | ENSDARG00000057529 | 24.80333333 | 14.19333333 | 1.747534 | 0.8053206  | 0.019231 | 1.715990969 |
| itpkca        | ENSDARG00000002994 | 11.57333333 | 9.663333333 | 1.197654 | 0.2602116  | 0.048573 | 1.31360863  |
| ivns1abpa     | ENSDARG00000031100 | 28.06333333 | 39.56666667 | 0.709267 | -0.4955991 | 0.002965 | 2.527942773 |
| JAKMIP3       | ENSDARG00000100708 | 1.246666667 | 3.396666667 | 0.367026 | -1.4460439 | 0.01647  | 1.78330398  |

|                 |                    |             |             |          |            |          |             |
|-----------------|--------------------|-------------|-------------|----------|------------|----------|-------------|
| JMJD1C (2 of 2) | ENSDARG00000100022 | 4.56666667  | 6.68333333  | 0.683292 | -0.5494263 | 0.016951 | 1.770800055 |
| jund            | ENSDARG00000067850 | 4.57333333  | 6.73666667  | 0.678872 | -0.5587888 | 0.019907 | 1.700995872 |
| jupa            | ENSDARG00000070787 | 40.03666667 | 23.95       | 1.671677 | 0.7412962  | 0.026495 | 1.576837013 |
| katna1          | ENSDARG00000099156 | 12.57       | 18.39666667 | 0.683276 | -0.5494597 | 0.036186 | 1.441458146 |
| kcnc2           | ENSDARG00000057468 | 1.32333333  | 2.61333333  | 0.506378 | -0.9817146 | 0.046759 | 1.330132264 |
| kcnma1a         | ENSDARG00000079840 | 2.90333333  | 6.08666667  | 0.476999 | -1.0679421 | 0.02978  | 1.526076203 |
| kcnv2b          | ENSDARG00000062906 | 0.97        | 3.10333333  | 0.312567 | -1.677762  | 0.005738 | 2.241206039 |
| kctd12.2        | ENSDARG00000053542 | 10.68666667 | 16.78333333 | 0.636743 | -0.6512174 | 0.044598 | 1.350683404 |
| kdelc2          | ENSDARG00000021408 | 8.02666667  | 5.46333333  | 1.469189 | 0.5550195  | 0.029664 | 1.527767033 |
| kdm5ba          | ENSDARG00000057093 | 14.95       | 19.81       | 0.754669 | -0.4060834 | 0.001373 | 2.862465425 |
| kdm6al          | ENSDARG00000059794 | 4.25333333  | 8.13        | 0.523165 | -0.9346614 | 0.015175 | 1.818870372 |
| kdm7ab          | ENSDARG00000018559 | 8.71666667  | 10.80666667 | 0.806601 | -0.3100731 | 0.026829 | 1.571398201 |
| khk             | ENSDARG00000029874 | 3.12333333  | 4.15        | 0.75261  | -0.4100248 | 0.024789 | 1.605737089 |
| kidins220b      | ENSDARG00000017338 | 34.95       | 59.26       | 0.589774 | -0.7617662 | 0.02353  | 1.628379486 |
| kif14           | ENSDARG00000062187 | 3.42        | 1.97666667  | 1.730185 | 0.7909267  | 0.024538 | 1.610162968 |
| kif21a          | ENSDARG00000061131 | 1.46333333  | 2.78        | 0.526379 | -0.9258264 | 0.042424 | 1.372390779 |
| kif3a           | ENSDARG00000087538 | 19.8833333  | 28.2433333  | 0.704001 | -0.5063507 | 0.033699 | 1.472383574 |
| kifap3b         | ENSDARG00000006862 | 17.60666667 | 23.8133333  | 0.739362 | -0.4356478 | 0.017182 | 1.764928503 |
| kifc3           | ENSDARG00000054978 | 16.7133333  | 25.1433333  | 0.664722 | -0.5891764 | 0.027046 | 1.567901451 |
| klc2            | ENSDARG00000099740 | 27.83       | 45.4        | 0.612996 | -0.7060514 | 0.02347  | 1.629492248 |
| klhl17          | ENSDARG00000037324 | 5.8         | 8.09666667  | 0.716344 | -0.4812752 | 0.001276 | 2.894062567 |
| KLHL25          | ENSDARG00000102418 | 1.35666667  | 2.94333333  | 0.460929 | -1.1173846 | 0.00861  | 2.065015456 |
| KLHL29 (2 of 2) | ENSDARG00000087688 | 3.31        | 7.90666667  | 0.418634 | -1.2562384 | 0.013244 | 1.877989816 |
| krt96           | ENSDARG00000095147 | 11.44666667 | 3.80666667  | 3.007005 | 1.5883274  | 0.030446 | 1.516463979 |
| kxd1            | ENSDARG00000051934 | 9.03666667  | 5.88333333  | 1.535977 | 0.6191569  | 0.045746 | 1.339643358 |
| l2hgdh          | ENSDARG00000060500 | 2.42666667  | 3.32        | 0.730924 | -0.4522073 | 0.023035 | 1.637609736 |
| l3mbt12         | ENSDARG00000056079 | 4.48        | 6.69666667  | 0.66899  | -0.5799444 | 0.03568  | 1.447577257 |
| lactbl1a        | ENSDARG00000089063 | 3.37333333  | 10.46       | 0.322498 | -1.6326361 | 0.009724 | 2.012149731 |
| lamb2l          | ENSDARG00000033950 | 6.37333333  | 5.31        | 1.200251 | 0.2633363  | 0.014404 | 1.841508505 |
| lancl2          | ENSDARG00000045465 | 6.73        | 11.25       | 0.598222 | -0.7412466 | 0.049735 | 1.303337292 |
| larp4b          | ENSDARG00000062146 | 2.75333333  | 4.07        | 0.676495 | -0.5638495 | 0.024199 | 1.616197472 |
| lbh             | ENSDARG00000087377 | 1.01666667  | 2.21        | 0.46003  | -1.1201996 | 0.032893 | 1.482900091 |
| lbr             | ENSDARG00000014013 | 68.86666667 | 37.77666667 | 1.822995 | 0.8663104  | 0.020054 | 1.697788573 |
| lcn15           | ENSDARG00000067851 | 1.24666667  | 2.87666667  | 0.433372 | -1.2063223 | 0.037145 | 1.430096598 |
| ldhbb           | ENSDARG00000071076 | 6.89333333  | 16.0933333  | 0.428335 | -1.2231895 | 0.001644 | 2.78406376  |
| leng8           | ENSDARG00000076805 | 3.86333333  | 5.6         | 0.689881 | -0.5355807 | 0.01919  | 1.716917103 |
| LEPROTL1        | ENSDARG00000104871 | 42.71666667 | 63.12       | 0.676753 | -0.5632981 | 0.035891 | 1.445020483 |
| letm2           | ENSDARG00000077515 | 16.0233333  | 21.6733333  | 0.739311 | -0.4357468 | 0.002974 | 2.526628367 |
| lgals3          | ENSDARG00000077850 | 31.49       | 19.36666667 | 1.62599  | 0.7013181  | 0.04906  | 1.309270527 |
| lgals3bpb       | ENSDARG00000040528 | 3.79        | 1.13        | 3.353982 | 1.7458751  | 0.009976 | 2.001033258 |
| lgr4            | ENSDARG00000060542 | 3.59        | 5.12        | 0.701172 | -0.51216   | 0.011006 | 1.958374778 |
| lhpp            | ENSDARG00000060196 | 0.35        | 2.41333333  | 0.145028 | -2.7856004 | 0.024417 | 1.612301004 |
| lin7a           | ENSDARG00000013414 | 38.1533333  | 64.9433333  | 0.587487 | -0.7673723 | 0.038174 | 1.418227098 |
| lingo1b         | ENSDARG00000035899 | 9.53666667  | 11.62       | 0.820711 | -0.2850531 | 0.001858 | 2.730982149 |
| lingo2a         | ENSDARG00000074535 | 5.95        | 10.45       | 0.569378 | -0.8125414 | 0.021571 | 1.66613871  |
| lipf            | ENSDARG00000018529 | 17.0633333  | 10.4033333  | 1.640179 | 0.7138536  | 0.036935 | 1.432566924 |
| lman2           | ENSDARG00000061854 | 54.7433333  | 45.2233333  | 1.210511 | 0.2756159  | 0.002939 | 2.531840148 |
| lmod1a          | ENSDARG00000056111 | 2.51666667  | 1.07666667  | 2.337461 | 1.2249425  | 0.027479 | 1.561002969 |
| lmx1bb          | ENSDARG00000068365 | 8.30666667  | 6.36666667  | 1.304712 | 0.3837314  | 0.04389  | 1.357636865 |
| lnx2a           | ENSDARG00000029177 | 9.43666667  | 16.22       | 0.581792 | -0.7814246 | 0.019178 | 1.717205891 |
| lpcat1          | ENSDARG00000011506 | 14.67666667 | 10.3        | 1.424919 | 0.51088    | 0.005806 | 2.236121411 |
| lpgat1          | ENSDARG00000013542 | 6.45        | 9.63        | 0.669782 | -0.5782366 | 0.001764 | 2.753591167 |
| lppr5b          | ENSDARG00000101348 | 0.53666667  | 2.4         | 0.223611 | -2.1609362 | 0.044771 | 1.348999965 |
| lrit1b          | ENSDARG00000099406 | 3.82333333  | 11.71666667 | 0.326316 | -1.6156593 | 0.042695 | 1.369620567 |

|               |                    |             |             |          |            |          |             |
|---------------|--------------------|-------------|-------------|----------|------------|----------|-------------|
| Irit3a        | ENSDARG00000055463 | 1.513333333 | 4.246666667 | 0.356358 | -1.4886011 | 0.024505 | 1.610752639 |
| LRR1          | ENSDARG00000104448 | 6.8         | 2.526666667 | 2.691293 | 1.4282994  | 0.032051 | 1.494151907 |
| Irrc73        | ENSDARG00000063411 | 5.323333333 | 8.586666667 | 0.619953 | -0.6897683 | 0.037404 | 1.427086866 |
| LRRN2         | ENSDARG00000105302 | 10.33666667 | 15.02666667 | 0.687888 | -0.539754  | 0.037632 | 1.424445907 |
| Irrtm1        | ENSDARG00000052713 | 17.90333333 | 30.06       | 0.595587 | -0.7476168 | 0.028481 | 1.545439109 |
| Irtm2b        | ENSDARG00000045811 | 1.633333333 | 4.583333333 | 0.356364 | -1.488578  | 0.032184 | 1.492359299 |
| LSM3          | ENSDARG00000089663 | 95.14       | 71.57666667 | 1.329204 | 0.4105627  | 0.006092 | 2.21523633  |
| lsm6          | ENSDARG00000036995 | 365.5266667 | 213.8033333 | 1.70964  | 0.7736923  | 0.011836 | 1.926809962 |
| luc7l         | ENSDARG00000055903 | 36          | 53.11666667 | 0.677753 | -0.5611677 | 0.002476 | 2.606334858 |
| luc7l3        | ENSDARG00000014366 | 16.78666667 | 25.54       | 0.65727  | -0.6054427 | 0.016298 | 1.787857448 |
| lyrm5b        | ENSDARG00000045827 | 2.386666667 | 0.306666667 | 7.782609 | 2.9602538  | 0.007621 | 2.117990337 |
| m6pr          | ENSDARG00000018432 | 20.07333333 | 14.41       | 1.393014 | 0.4782099  | 0.000112 | 3.950279838 |
| magi1a        | ENSDARG00000070145 | 13.87333333 | 19.07333333 | 0.727368 | -0.4592425 | 0.042911 | 1.367428347 |
| man1b1a       | ENSDARG00000073792 | 2.62        | 5.783333333 | 0.453026 | -1.1423344 | 0.030009 | 1.522755099 |
| man2b1        | ENSDARG00000001897 | 6.563333333 | 3.72        | 1.764337 | 0.8191261  | 0.010513 | 1.978270833 |
| MAN2B2        | ENSDARG00000079463 | 1.203333333 | 2.196666667 | 0.5478   | -0.8682796 | 0.019788 | 1.703593955 |
| mansc1        | ENSDARG00000104839 | 6.99        | 16.51333333 | 0.423294 | -1.240267  | 0.021806 | 1.661426965 |
| map1sb        | ENSDARG00000060326 | 2.35        | 3.74        | 0.628342 | -0.6703775 | 0.009161 | 2.038067734 |
| map2k5        | ENSDARG00000011851 | 2.353333333 | 4.32        | 0.544753 | -0.8763256 | 0.039145 | 1.407327195 |
| map6b         | ENSDARG00000074073 | 2.363333333 | 3.826666667 | 0.617596 | -0.6952651 | 0.032033 | 1.494405837 |
| MAP7 (2 of 2) | ENSDARG00000104435 | 1.46        | 3.193333333 | 0.457203 | -1.1290948 | 0.035515 | 1.449582245 |
| mapk8ip3      | ENSDARG00000062531 | 8.793333333 | 17.89333333 | 0.491431 | -1.0249401 | 0.039935 | 1.398641913 |
| mapre3b       | ENSDARG00000102878 | 11.42666667 | 18.6        | 0.614337 | -0.702898  | 0.024679 | 1.607665742 |
| march5l       | ENSDARG00000028559 | 12.96333333 | 16.41666667 | 0.789645 | -0.3407245 | 0.040568 | 1.391812383 |
| mark3b        | ENSDARG00000026630 | 9.48        | 14.39666667 | 0.658486 | -0.6027759 | 0.002099 | 2.678051012 |
| masp1         | ENSDARG00000068726 | 4.093333333 | 1.583333333 | 2.585263 | 1.3703111  | 0.037736 | 1.42324435  |
| max           | ENSDARG00000024844 | 77.29333333 | 123.0966667 | 0.627908 | -0.6713758 | 0.002102 | 2.677285379 |
| mbpb          | ENSDARG00000089413 | 27.55333333 | 22.51333333 | 1.223867 | 0.2914472  | 0.026313 | 1.579832476 |
| mcat          | ENSDARG00000016613 | 3.24        | 1.25        | 2.592    | 1.3740657  | 0.001867 | 2.728844416 |
| mcm3          | ENSDARG00000024204 | 20.86333333 | 13.57       | 1.53746  | 0.620549   | 0.00666  | 2.176532661 |
| mcm4          | ENSDARG00000040041 | 38.22666667 | 28.15       | 1.357963 | 0.4414445  | 0.025112 | 1.600115888 |
| mcm5          | ENSDARG00000019507 | 38.99       | 21.52333333 | 1.811522 | 0.8572026  | 0.000612 | 3.212998105 |
| mcoln1a       | ENSDARG00000002285 | 3.156666667 | 4.556666667 | 0.692758 | -0.5295769 | 0.035316 | 1.452028372 |
| mdkb          | ENSDARG00000020708 | 291.54      | 473.23      | 0.616064 | -0.6988477 | 0.016268 | 1.788659803 |
| med18         | ENSDARG00000041237 | 12.70666667 | 6.76        | 1.879684 | 0.9104905  | 0.01771  | 1.751776865 |
| mef2aa        | ENSDARG00000031756 | 4.69        | 6.406666667 | 0.73205  | -0.449986  | 0.014209 | 1.847435975 |
| meox1         | ENSDARG00000007891 | 5.88        | 2.796666667 | 2.102503 | 1.0721078  | 0.020785 | 1.682244746 |
| mettl2a       | ENSDARG00000008105 | 23.47666667 | 15.79333333 | 1.486492 | 0.5719119  | 0.018705 | 1.728048485 |
| mettl5        | ENSDARG00000068893 | 18.12666667 | 9.513333333 | 1.905396 | 0.9300908  | 0.018935 | 1.722740224 |
| mettl6        | ENSDARG00000070085 | 5.66        | 1.953333333 | 2.897611 | 1.5348639  | 0.043646 | 1.36005108  |
| mettl7a       | ENSDARG00000056726 | 2.383333333 | 4.436666667 | 0.53719  | -0.8964954 | 0.042259 | 1.374083128 |
| mfge8b        | ENSDARG00000045803 | 2.756666667 | 4.293333333 | 0.642081 | -0.6391734 | 0.020374 | 1.69091583  |
| mfn2          | ENSDARG00000079504 | 9.086666667 | 13.13       | 0.692054 | -0.5310439 | 0.045139 | 1.3454462   |
| mfsd5         | ENSDARG00000015997 | 9.36        | 6.873333333 | 1.361785 | 0.4454986  | 0.042666 | 1.369916366 |
| mgme1         | ENSDARG00000016656 | 7.88        | 4.28        | 1.841121 | 0.8805848  | 0.035715 | 1.447153364 |
| mgrn1b        | ENSDARG00000004796 | 15.39       | 18.98       | 0.810854 | -0.3024868 | 0.030194 | 1.520081264 |
| mgst1.1       | ENSDARG00000032618 | 10.10666667 | 13.71       | 0.737175 | -0.4399213 | 0.048811 | 1.31148217  |
| mibp          | ENSDARG00000101362 | 40.38333333 | 28.84666667 | 1.399931 | 0.4853554  | 0.031471 | 1.502085512 |
| mier1a        | ENSDARG00000041072 | 16.35333333 | 9.613333333 | 1.70111  | 0.7664761  | 0.047095 | 1.327022144 |
| mllt1b        | ENSDARG00000031709 | 2.563333333 | 4.32        | 0.593364 | -0.7530102 | 0.026215 | 1.581445762 |
| mmab          | ENSDARG00000068344 | 14.6        | 6.44        | 2.267081 | 1.1808358  | 0.021472 | 1.668121716 |
| MMP23B        | ENSDARG00000043079 | 2.293333333 | 3.873333333 | 0.592083 | -0.7561296 | 0.007753 | 2.11053178  |
| mob1bb        | ENSDARG00000012953 | 5.55        | 10.07666667 | 0.550777 | -0.8604588 | 0.034839 | 1.457932423 |
| mpc2          | ENSDARG00000024478 | 141.62      | 108.05      | 1.310689 | 0.3903259  | 0.03261  | 1.486647585 |

|               |                    |             |             |          |            |          |             |
|---------------|--------------------|-------------|-------------|----------|------------|----------|-------------|
| mpdu1a        | ENSDARG00000035562 | 6           | 3.7         | 1.621622 | 0.6974372  | 0.028013 | 1.552643797 |
| mpeg1.1       | ENSDARG00000055290 | 2.073333333 | 0.826666667 | 2.508065 | 1.3265745  | 0.040171 | 1.396087371 |
| mpi           | ENSDARG00000030786 | 1.763333333 | 4.016666667 | 0.439004 | -1.1876935 | 0.009721 | 2.012294284 |
| mpp2b         | ENSDARG00000010957 | 11.14       | 16.59       | 0.671489 | -0.5745647 | 0.001284 | 2.891549467 |
| MPP4 (2 of 2) | ENSDARG00000076872 | 1.036666667 | 23.10333333 | 0.044871 | -4.478077  | 0.003922 | 2.406530943 |
| mpv17l2       | ENSDARG00000056367 | 3.503333333 | 6.286666667 | 0.557264 | -0.843567  | 0.026549 | 1.575953338 |
| mrpl1         | ENSDARG00000054606 | 29.42666667 | 15.25666667 | 1.928774 | 0.9476843  | 0.007648 | 2.116435281 |
| mrpl10        | ENSDARG00000045091 | 23.07333333 | 25.54333333 | 0.903302 | -0.1467204 | 0.034378 | 1.463718072 |
| mrpl3         | ENSDARG00000103318 | 55.41       | 35.39666667 | 1.565402 | 0.6465329  | 0.041448 | 1.382496413 |
| mrpl44        | ENSDARG00000094277 | 23.40666667 | 16.93333333 | 1.382283 | 0.4670535  | 0.04044  | 1.393192551 |
| mrps2         | ENSDARG00000103198 | 31.87666667 | 23.74666667 | 1.342364 | 0.4247758  | 0.033045 | 1.480893385 |
| mrps24        | ENSDARG00000100116 | 88.61333333 | 61.85       | 1.432714 | 0.5187502  | 0.043806 | 1.358469719 |
| msrb1a        | ENSDARG00000025436 | 1.026666667 | 3.11        | 0.330118 | -1.5989467 | 0.040738 | 1.389995626 |
| mt-atp6       | ENSDARG00000063911 | 8376.62     | 12481.31667 | 0.671133 | -0.57533   | 0.032769 | 1.484534778 |
| mt-atp8       | ENSDARG00000063910 | 2437.64     | 3991.076667 | 0.610773 | -0.7112929 | 0.014154 | 1.849127499 |
| mtch2         | ENSDARG00000019732 | 43.89       | 65.14333333 | 0.673745 | -0.5697253 | 0.007423 | 2.129446225 |
| mtfr1         | ENSDARG00000045304 | 4.99        | 2.476666667 | 2.014805 | 1.0106401  | 0.030912 | 1.509876432 |
| mtfr2         | ENSDARG00000060394 | 6.32        | 3.7         | 1.708108 | 0.7723993  | 0.015248 | 1.816790327 |
| mthfd2        | ENSDARG00000098646 | 11.19333333 | 18.16666667 | 0.616147 | -0.698654  | 0.041262 | 1.384453998 |
| mtmr6         | ENSDARG00000016794 | 5.446666667 | 8.686666667 | 0.627015 | -0.6734291 | 0.017919 | 1.746685401 |
| mtmr8         | ENSDARG00000008592 | 2.82        | 1.65        | 1.709091 | 0.7732291  | 0.042622 | 1.370361441 |
| mt-nd1        | ENSDARG00000063895 | 2213.38     | 3155.88     | 0.701351 | -0.5117912 | 0.015284 | 1.815766243 |
| mt-nd2        | ENSDARG00000063899 | 1442.823333 | 2287.34     | 0.630787 | -0.6647762 | 0.016612 | 1.779589104 |
| mtus1b        | ENSDARG00000034105 | 8.693333333 | 15.08666667 | 0.576226 | -0.7952927 | 0.027662 | 1.558124094 |
| mtx1b         | ENSDARG00000036109 | 2.623333333 | 5.333333333 | 0.491875 | -1.0236364 | 0.036557 | 1.437032545 |
| mul1a         | ENSDARG00000021398 | 3.45        | 2.523333333 | 1.367239 | 0.4512656  | 0.022824 | 1.641612551 |
| mvdb          |                    | 13.08       | 17.57333333 | 0.74431  | -0.4260253 | 0.036436 | 1.438464898 |
| mybpc2b       | ENSDARG00000021265 | 12.72       | 6.506666667 | 1.954918 | 0.9671081  | 0.049631 | 1.304247577 |
| mycbp2        | ENSDARG00000001220 | 10.04       | 14.69666667 | 0.683148 | -0.5497297 | 0.031043 | 1.508038591 |
| myef2         | ENSDARG00000059398 | 35.35333333 | 57.06666667 | 0.619509 | -0.690802  | 0.029281 | 1.533419173 |
| myhz1.1       | ENSDARG00000067990 | 5013.203333 | 3515.986667 | 1.425831 | 0.5118032  | 0.014187 | 1.848102123 |
| mylipa        | ENSDARG00000008859 | 3.8         | 5.083333333 | 0.747541 | -0.4197754 | 0.012016 | 1.920230909 |
| myo3a         | ENSDARG00000010186 | 1.9         | 4.593333333 | 0.413643 | -1.2735421 | 0.001136 | 2.944758719 |
| myo5aa        | ENSDARG00000061635 | 3.356666667 | 5.37        | 0.625078 | -0.6778928 | 0.003226 | 2.491355005 |
| n4bp2l2       | ENSDARG00000103507 | 14.17666667 | 11.02       | 1.286449 | 0.3633941  | 0.034145 | 1.466669612 |
| naa25         | ENSDARG00000075446 | 10.64333333 | 17.18666667 | 0.619279 | -0.6913397 | 0.010705 | 1.970421339 |
| nbeaa         | ENSDARG00000070080 | 4.373333333 | 7.206666667 | 0.606846 | -0.7205988 | 0.047664 | 1.321812258 |
| NBR1 (2 of 2) | ENSDARG00000078772 | 6.46        | 9.24        | 0.699134 | -0.5163587 | 0.007859 | 2.104616098 |
| ncaph2        | ENSDARG00000033757 | 13.84333333 | 8.786666667 | 1.575493 | 0.6558035  | 0.041814 | 1.378681682 |
| nckap1        | ENSDARG00000060853 | 26.75       | 34.72333333 | 0.770375 | -0.3763666 | 0.032719 | 1.485194983 |
| nckipsd       | ENSDARG00000079475 | 3.836666667 | 6.183333333 | 0.620485 | -0.6885314 | 0.036689 | 1.435460535 |
| ncoa4         | ENSDARG00000021439 | 34.07666667 | 23.38333333 | 1.457306 | 0.5433036  | 0.001521 | 2.817876801 |
| ndnl2         | ENSDARG00000058212 | 17.81666667 | 10.24666667 | 1.738777 | 0.7980728  | 0.008186 | 2.086953134 |
| ndrg1a        | ENSDARG00000032849 | 25.08666667 | 57.56333333 | 0.43581  | -1.1982293 | 0.012655 | 1.897721806 |
| ndrg3b        | ENSDARG00000010052 | 25.06       | 39.88666667 | 0.62828  | -0.6705201 | 0.005066 | 2.295322611 |
| ndrg4         | ENSDARG00000103937 | 57.04333333 | 122.3666667 | 0.466167 | -1.1010804 | 0.002008 | 2.697206235 |
| NDUFAF3       | ENSDARG00000112931 | 72.62       | 58.63       | 1.238615 | 0.3087279  | 0.026928 | 1.569788763 |
| necab2        | ENSDARG00000056745 | 28.78       | 50.53       | 0.569563 | -0.8120736 | 0.029948 | 1.52362494  |
| nefma         | ENSDARG00000021351 | 13.87666667 | 24.85       | 0.558417 | -0.8405848 | 0.024101 | 1.617973886 |
| nelfb         | ENSDARG00000035505 | 6.836666667 | 10.10333333 | 0.676674 | -0.5634664 | 0.01972  | 1.70508789  |
| nelfcd        | ENSDARG00000021097 | 15.19       | 8.42        | 1.804038 | 0.8512297  | 0.000553 | 3.25762322  |
| nfasca        | ENSDARG00000061099 | 6.166666667 | 8.466666667 | 0.728346 | -0.4573032 | 0.029021 | 1.537293284 |
| nfkbb         | ENSDARG00000030087 | 56.57666667 | 41.68       | 1.357406 | 0.4408519  | 0.029739 | 1.526679502 |
| nfybb         | ENSDARG00000045611 | 16.68666667 | 14.02333333 | 1.189922 | 0.2508665  | 0.004121 | 2.385016838 |

|                  |                    |             |             |          |            |          |             |
|------------------|--------------------|-------------|-------------|----------|------------|----------|-------------|
| nhsb             | ENSDARG00000079977 | 6.213333333 | 10.00333333 | 0.621126 | -0.6870415 | 0.026163 | 1.582320294 |
| nhs1a            | ENSDARG00000054537 | 4.453333333 | 7.65        | 0.582135 | -0.7805741 | 0.000426 | 3.370995714 |
| nipa2            | ENSDARG00000055912 | 14.72666667 | 10.96       | 1.343674 | 0.4261831  | 0.012477 | 1.903905464 |
| nisch            | ENSDARG00000043077 | 4.26        | 6.193333333 | 0.687836 | -0.5398627 | 0.037236 | 1.429041231 |
| nkx2.4a          | ENSDARG00000075107 | 2.64        | 3.683333333 | 0.716742 | -0.480474  | 0.034263 | 1.465172266 |
| nln              | ENSDARG00000019233 | 4.173333333 | 2.58        | 1.617571 | 0.6938291  | 0.023567 | 1.627704236 |
| npas4a           | ENSDARG00000055752 | 1.46        | 4.886666667 | 0.298772 | -1.7428823 | 0.001243 | 2.905434707 |
| NPBWR2 (1 of 2)  | ENSDARG00000033393 | 1.736666667 | 3.793333333 | 0.457821 | -1.1271453 | 0.027825 | 1.555560783 |
| npepps           | ENSDARG00000044943 | 16.59       | 24.55       | 0.675764 | -0.5654091 | 0.026619 | 1.574800696 |
| npm3             | ENSDARG00000103594 | 28.93666667 | 17.39333333 | 1.663664 | 0.7343643  | 0.020317 | 1.692142549 |
| nptnb            | ENSDARG00000043864 | 28.53       | 58.07666667 | 0.491247 | -1.0254789 | 0.003779 | 2.422650093 |
| nptx1l           | ENSDARG00000074671 | 11.44333333 | 16.84       | 0.679533 | -0.5573848 | 0.023448 | 1.629892079 |
| nrg2b            | ENSDARG00000086585 | 3.106666667 | 5.96        | 0.521253 | -0.9399449 | 0.027737 | 1.556942644 |
| nrgna            | ENSDARG00000039626 | 32.36       | 70.92       | 0.456289 | -1.1319809 | 0.031136 | 1.506735358 |
| nrip2            | ENSDARG00000079985 | 0.8         | 3.44        | 0.232558 | -2.1043367 | 0.026193 | 1.581813732 |
| nrm              | ENSDARG00000063690 | 4.093333333 | 2.13        | 1.921753 | 0.9424227  | 0.040528 | 1.392239876 |
| nrxn3b           | ENSDARG00000062693 | 0.243333333 | 2.78        | 0.08753  | -3.514079  | 0.037635 | 1.424410975 |
| nsfa             | ENSDARG00000007654 | 50.95666667 | 81.17       | 0.627777 | -0.6716757 | 0.012611 | 1.899241322 |
| nsmce2           | ENSDARG00000076379 | 7.34        | 4.553333333 | 1.612006 | 0.688857   | 0.028119 | 1.551001898 |
| nt5c1ba          | ENSDARG00000018153 | 3.833333333 | 7.87        | 0.487082 | -1.0377642 | 0.035166 | 1.453877412 |
| nt5dc2           | ENSDARG00000059646 | 24.79666667 | 21.78666667 | 1.138158 | 0.1867007  | 0.028234 | 1.549232535 |
| ntmt1            | ENSDARG00000022399 | 20.79       | 12.68       | 1.63959  | 0.713335   | 0.012467 | 1.904224028 |
| ntng1a           | ENSDARG00000014973 | 2.613333333 | 7.48        | 0.349376 | -1.5171471 | 0.005647 | 2.248200746 |
| ntrk3a           | ENSDARG00000077228 | 1.636666667 | 3.213333333 | 0.509336 | -0.9733101 | 0.045612 | 1.340921379 |
| nucb2b           | ENSDARG00000036291 | 11.63       | 6.906666667 | 1.68388  | 0.7517896  | 0.004771 | 2.321434016 |
| nudt15           | ENSDARG00000022461 | 6.213333333 | 3.06        | 2.030501 | 1.0218358  | 0.022749 | 1.643046303 |
| nudt22           | ENSDARG00000071671 | 5.72        | 3.456666667 | 1.654773 | 0.7266337  | 0.018263 | 1.738431143 |
| nudt5            | ENSDARG00000078073 | 36.07       | 16.45333333 | 2.192261 | 1.1324195  | 0.004374 | 2.359133743 |
| nup107           | ENSDARG00000016010 | 19.42333333 | 13.20666667 | 1.470722 | 0.5565244  | 0.026363 | 1.579006707 |
| nx1              | ENSDARG00000055076 | 16.22666667 | 24.98       | 0.649586 | -0.6224068 | 0.012664 | 1.897435527 |
| nyx              | ENSDARG00000061791 | 1.026666667 | 4.45        | 0.230712 | -2.1158375 | 0.002869 | 2.542206033 |
| ogfod2           | ENSDARG00000056211 | 2.593333333 | 1.396666667 | 1.856802 | 0.8928199  | 0.005117 | 2.291026124 |
| oip5             | ENSDARG00000093597 | 13.34666667 | 6.796666667 | 1.963708 | 0.9735802  | 0.045845 | 1.338710435 |
| ola1             | ENSDARG00000044565 | 124.0166667 | 105.7266667 | 1.172993 | 0.2301947  | 0.038182 | 1.418136305 |
| olah             | ENSDARG00000058502 | 7.383333333 | 1.936666667 | 3.812392 | 1.9306966  | 0.000372 | 3.429526025 |
| olfm1a           | ENSDARG00000018270 | 14.05       | 21.33666667 | 0.658491 | -0.6027647 | 0.036766 | 1.434558985 |
| olfm3a           | ENSDARG00000071493 | 3.913333333 | 8.253333333 | 0.474152 | -1.0765789 | 0.022356 | 1.650611916 |
| opn1mw1          | ENSDARG00000097008 | 148.57      | 493.6566667 | 0.300958 | -1.7323652 | 0.025507 | 1.59333741  |
| opn1mw2          | ENSDARG00000044280 | 4.44        | 22.16666667 | 0.200301 | -2.3197603 | 0.000271 | 3.567338452 |
| opn1sw1          | ENSDARG00000045677 | 242.7366667 | 939.0866667 | 0.258482 | -1.9518663 | 0.0088   | 2.055522369 |
| opn1sw2          | ENSDARG00000017274 | 109.8266667 | 364.18      | 0.301572 | -1.7294233 | 0.016223 | 1.789871223 |
| opn4.1           | ENSDARG00000007553 | 2.713333333 | 7.9         | 0.34346  | -1.5417864 | 0.018551 | 1.731633792 |
| orc4             | ENSDARG00000101161 | 13.47666667 | 9.57        | 1.40822  | 0.4938729  | 0.025926 | 1.586262353 |
| orc6             | ENSDARG00000075682 | 8.666666667 | 5.786666667 | 1.497696 | 0.5827447  | 0.024388 | 1.612819729 |
| osbp2            | ENSDARG00000053487 | 4.403333333 | 6.463333333 | 0.681279 | -0.5536823 | 0.01658  | 1.780410557 |
| OSBPL10 (2 of 2) | ENSDARG00000099747 | 1.68        | 4.006666667 | 0.419301 | -1.2539413 | 0.000961 | 3.017349267 |
| OSCP1 (1 of 2)   | ENSDARG00000101888 | 5.996666667 | 9.47        | 0.633228 | -0.6592036 | 0.039239 | 1.406282102 |
| otud4            | ENSDARG00000104790 | 100.8233333 | 427.7433333 | 0.23571  | -2.0849158 | 0.001373 | 2.862359972 |
| otud5a           | ENSDARG00000059006 | 15.97666667 | 19.57       | 0.816386 | -0.2926773 | 0.045824 | 1.338911029 |
| oxr1b            | ENSDARG00000063310 | 5.52        | 9.09        | 0.607261 | -0.719612  | 0.000974 | 3.011575758 |
| oxsr1b           | ENSDARG00000027500 | 8.103333333 | 4.046666667 | 2.002471 | 1.0017815  | 0.020557 | 1.687034262 |
| p2rx3b           | ENSDARG00000029718 | 4.326666667 | 2.19        | 1.975647 | 0.9823251  | 0.022103 | 1.655551069 |
| p3h1             | ENSDARG00000071212 | 13.57       | 9.63        | 1.409138 | 0.494813   | 0.004636 | 2.333836593 |
| p4ha1b           | ENSDARG00000071082 | 12.16       | 6.193333333 | 1.963402 | 0.9733552  | 0.006706 | 2.173526991 |



|           |                    |             |             |          |            |          |             |
|-----------|--------------------|-------------|-------------|----------|------------|----------|-------------|
| pabpn1    | ENSDARG00000045373 | 91.11666667 | 130.62      | 0.697571 | -0.5195889 | 0.003108 | 2.507562438 |
| pascin1b  | ENSDARG00000042128 | 13.92       | 22.60333333 | 0.615838 | -0.6993763 | 0.031497 | 1.501730712 |
| pafah1b1b | ENSDARG00000026595 | 26.19       | 41.57666667 | 0.629921 | -0.666758  | 0.033686 | 1.472555585 |
| pak1      | ENSDARG00000103959 | 21.61333333 | 31.99       | 0.675628 | -0.5656994 | 0.021792 | 1.661702399 |
| pak1ip1   | ENSDARG00000044488 | 19.03333333 | 14.37333333 | 1.324212 | 0.4051336  | 0.029763 | 1.526318033 |
| pak7      | ENSDARG00000030154 | 9.293333333 | 12.07666667 | 0.769528 | -0.3779542 | 0.038276 | 1.41706979  |
| parp6b    | ENSDARG00000070473 | 11.4        | 14.85       | 0.767677 | -0.3814291 | 0.01833  | 1.736838211 |
| PAXBP1    | ENSDARG00000062361 | 5.736666667 | 6.95        | 0.82542  | -0.2768003 | 0.01653  | 1.781724108 |
| pbxip1a   | ENSDARG00000071015 | 15.85333333 | 13.47333333 | 1.176645 | 0.2346794  | 0.040723 | 1.390156872 |
| pcbp4     | ENSDARG00000024276 | 11.77333333 | 20.58666667 | 0.571891 | -0.8061874 | 0.009985 | 2.00065467  |
| pcdh18a   | ENSDARG00000089805 | 6.673333333 | 8.923333333 | 0.747852 | -0.4191752 | 0.032834 | 1.483681868 |
| pcdh7a    | ENSDARG00000078898 | 8.58        | 11.66666667 | 0.735429 | -0.4433429 | 0.014907 | 1.826600263 |
| pcdh7b    | ENSDARG00000060610 | 3.763333333 | 8.58        | 0.438617 | -1.1889666 | 0.016753 | 1.775912151 |
| pcm1      | ENSDARG00000062198 | 7.246666667 | 9.223333333 | 0.785688 | -0.3479707 | 0.015568 | 1.807774253 |
| pcnx      | ENSDARG00000011819 | 3.986666667 | 5.68        | 0.701878 | -0.5107079 | 0.049512 | 1.305290873 |
| pcp4a     | ENSDARG00000053130 | 100.1033333 | 176.2366667 | 0.568005 | -0.8160241 | 0.029347 | 1.532439649 |
| pcyt1ab   | ENSDARG00000004492 | 5.923333333 | 8.55        | 0.692788 | -0.5295151 | 0.043142 | 1.365098963 |
| pdcb      | ENSDARG00000017634 | 17.41       | 66.96666667 | 0.25998  | -1.943527  | 0.001473 | 2.831920368 |
| pdc2l     | ENSDARG00000002754 | 1.45        | 2.733333333 | 0.530488 | -0.9146085 | 0.020483 | 1.688597884 |
| pddc1     | ENSDARG00000053609 | 42.78333333 | 26.52666667 | 1.612842 | 0.6896055  | 0.001536 | 2.813665068 |
| pde4ba    | ENSDARG00000032868 | 28.88666667 | 37.1        | 0.778616 | -0.3610155 | 0.009066 | 2.042590922 |
| pde6b     | ENSDARG00000011671 | 1.09        | 2.093333333 | 0.520701 | -0.9414739 | 0.033413 | 1.476078783 |
| pde6c     | ENSDARG00000100397 | 11.55333333 | 47.81333333 | 0.241634 | -2.0491038 | 0.00374  | 2.427113082 |
| pde6h     | ENSDARG00000102558 | 53.98       | 218.6766667 | 0.246848 | -2.0183024 | 0.040688 | 1.390536977 |
| pdgfaa    | ENSDARG00000055505 | 7.373333333 | 10.46333333 | 0.704683 | -0.5049536 | 0.025765 | 1.588975682 |
| pdha1a    | ENSDARG00000012387 | 76.52333333 | 99.27333333 | 0.770835 | -0.3755065 | 0.028873 | 1.539508557 |
| pdhb      | ENSDARG00000021346 | 109.79      | 123.8966667 | 0.886142 | -0.1743907 | 0.034981 | 1.456170812 |
| pdhx      | ENSDARG00000051756 | 17.70666667 | 26.82333333 | 0.660122 | -0.5991959 | 0.029619 | 1.528436679 |
| pdia4     | ENSDARG00000018491 | 47.01       | 33.82333333 | 1.389869 | 0.4749488  | 0.023696 | 1.625319687 |
| pdxka     | ENSDARG00000088959 | 3.726666667 | 7.253333333 | 0.513787 | -0.9607584 | 0.002489 | 2.604002624 |
| pef1      | ENSDARG00000023989 | 9.106666667 | 6.356666667 | 1.432617 | 0.5186526  | 0.018264 | 1.738394505 |
| PEL13     | ENSDARG00000087452 | 8.31        | 13.40666667 | 0.619841 | -0.6900302 | 0.025882 | 1.586995701 |
| peo       | ENSDARG00000055477 | 34.41666667 | 24.15666667 | 1.424727 | 0.510686   | 0.003303 | 2.481117367 |
| per2      | ENSDARG00000034503 | 4.763333333 | 10.83666667 | 0.439557 | -1.1858776 | 0.033983 | 1.46873239  |
| pes       | ENSDARG00000018902 | 42.46333333 | 30.80333333 | 1.37853  | 0.4631311  | 0.018374 | 1.735801418 |
| pfdn4     | ENSDARG00000061228 | 87.29666667 | 64.27333333 | 1.35821  | 0.4417063  | 0.017796 | 1.749669886 |
| pfkpa     | ENSDARG00000028000 | 14.41333333 | 25.90333333 | 0.556428 | -0.8457337 | 0.046214 | 1.335224679 |
| pgam1b    | ENSDARG00000014068 | 44.41666667 | 85.74333333 | 0.518019 | -0.9489234 | 0.009277 | 2.032609455 |
| pgls      | ENSDARG00000021233 | 4.093333333 | 12.56       | 0.325902 | -1.6174884 | 0.017693 | 1.752186547 |
| pgm3      | ENSDARG00000024654 | 5.67        | 3.203333333 | 1.770031 | 0.8237748  | 0.025392 | 1.595310051 |
| PHC3      | ENSDARG00000079167 | 4.5         | 7.67        | 0.586701 | -0.7693016 | 0.005198 | 2.284187844 |
| phf5a     | ENSDARG00000045155 | 154.5766667 | 91.18333333 | 1.695229 | 0.7614805  | 0.025295 | 1.596966267 |
| phtf2     | ENSDARG00000102123 | 13.01       | 20.20666667 | 0.643847 | -0.6352104 | 0.040117 | 1.396675233 |
| phyh      | ENSDARG00000086740 | 9.646666667 | 13.57333333 | 0.710707 | -0.4926726 | 0.028686 | 1.542333241 |
| PHYHIP    | ENSDARG00000078176 | 3.09        | 6.44        | 0.479814 | -1.0594539 | 0.009421 | 2.025884436 |
| pi4k2b    | ENSDARG00000013881 | 6.256666667 | 8.14        | 0.768632 | -0.3796346 | 0.047489 | 1.323410134 |
| picalma   | ENSDARG00000012866 | 8.516666667 | 12.20666667 | 0.697706 | -0.5193085 | 0.03209  | 1.493632856 |
| pif1      | ENSDARG00000020289 | 9.233333333 | 4.27        | 2.162373 | 1.1126155  | 0.037481 | 1.426184223 |
| pigl      | ENSDARG00000067752 | 6.506666667 | 4.47        | 1.45563  | 0.5416438  | 0.017938 | 1.746217725 |
| pign      | ENSDARG00000077532 | 0.913333333 | 2.116666667 | 0.431496 | -1.2125807 | 0.02161  | 1.665341053 |
| pih1d1    | ENSDARG00000037955 | 7.213333333 | 3.73        | 1.93387  | 0.9514905  | 0.024131 | 1.617429137 |
| pik3r1    | ENSDARG00000038524 | 22.37333333 | 30.23666667 | 0.73994  | -0.4345189 | 0.008126 | 2.09010093  |
| pik3r4    | ENSDARG00000060469 | 4.893333333 | 7.016666667 | 0.697387 | -0.5199683 | 0.015215 | 1.817729946 |
| pikfyve   | ENSDARG00000056112 | 5.106666667 | 7.056666667 | 0.723666 | -0.466605  | 0.003313 | 2.479832816 |

|                  |                     |             |             |          |            |          |             |
|------------------|---------------------|-------------|-------------|----------|------------|----------|-------------|
| pim3             | ENSDARG00000055129  | 26.98666667 | 19.23666667 | 1.402876 | 0.488388   | 0.030791 | 1.511580969 |
| pin4             | ENSDARG00000004527  | 79.39666667 | 49.95       | 1.589523 | 0.6685938  | 0.001981 | 2.703101713 |
| pkdccb           | ENSDARG00000038235  | 3.306666667 | 4.556666667 | 0.725677 | -0.4626012 | 0.022554 | 1.646769039 |
| PKIB (2 of 2)    | ENSDARG000000095152 | 3.993333333 | 8.823333333 | 0.452588 | -1.1437303 | 0.001162 | 2.934712096 |
| PLCXD2           | ENSDARG00000058200  | 0.866666667 | 4.673333333 | 0.185449 | -2.4309028 | 0.037815 | 1.422338673 |
| plcx3            | ENSDARG00000054794  | 10.97333333 | 14.77333333 | 0.74278  | -0.4289935 | 0.014429 | 1.840762644 |
| PLEKHB1          | ENSDARG00000063519  | 1.94        | 9.27        | 0.209277 | -2.2565127 | 0.00188  | 2.725908468 |
| plekho1a         | ENSDARG00000061191  | 9.263333333 | 13.54666667 | 0.683809 | -0.5483346 | 7.63E-05 | 4.117347523 |
| plk2a            | ENSDARG00000090752  | 5.023333333 | 6.766666667 | 0.742365 | -0.4298003 | 0.035197 | 1.453497325 |
| plrg1            | ENSDARG00000037283  | 31.63333333 | 20.46       | 1.546106 | 0.6286394  | 0.026999 | 1.568655296 |
| podxl2           |                     | 5.936666667 | 8.14        | 0.72932  | -0.4553757 | 0.028719 | 1.54183046  |
| polb             | ENSDARG00000003749  | 73.98333333 | 48.85333333 | 1.514397 | 0.5987433  | 0.007674 | 2.114955116 |
| pole3            | ENSDARG00000008551  | 17.77666667 | 29.67666667 | 0.599012 | -0.7393442 | 0.035573 | 1.448884817 |
| polg2            | ENSDARG00000074933  | 5.953333333 | 3.496666667 | 1.702574 | 0.7677174  | 0.022694 | 1.644096438 |
| polr2gl          | ENSDARG00000056127  | 87.94       | 57.77333333 | 1.522156 | 0.6061158  | 0.007703 | 2.113355195 |
| polr2i           | ENSDARG00000040443  | 68.76       | 40.65333333 | 1.691374 | 0.7581959  | 0.015241 | 1.816995164 |
| pom121           | ENSDARG00000055113  | 2.296666667 | 5.423333333 | 0.423479 | -1.2396384 | 0.005704 | 2.243787754 |
| pomk             | ENSDARG00000003208  | 5.01        | 3.623333333 | 1.382705 | 0.4674931  | 0.041253 | 1.384546823 |
| pomt1            | ENSDARG00000067670  | 2.11        | 4.4         | 0.479545 | -1.0602605 | 0.015134 | 1.820059181 |
| pop5             | ENSDARG00000053452  | 15.33333333 | 10.73333333 | 1.428571 | 0.5145732  | 0.031088 | 1.507413649 |
| pou3f3a          | ENSDARG00000042032  | 11.7        | 17.85666667 | 0.655217 | -0.6099543 | 0.020725 | 1.683504112 |
| pou4f1           | ENSDARG00000005559  | 13.13       | 19.15       | 0.68564  | -0.5444775 | 0.04221  | 1.374580452 |
| ppa1a            | ENSDARG00000099933  | 1.34        | 8.126666667 | 0.164889 | -2.6004307 | 0.024492 | 1.610982661 |
| ppa2             | ENSDARG00000009685  | 8.633333333 | 6.616666667 | 1.304786 | 0.3838131  | 0.031024 | 1.508303035 |
| ppapdc1b         |                     | 15.60666667 | 21.07666667 | 0.740471 | -0.4334843 | 0.031803 | 1.497533319 |
| ppcdc            | ENSDARG00000033020  | 6.163333333 | 2.62        | 2.352417 | 1.234144   | 0.036196 | 1.441335978 |
| ppdpfa           | ENSDARG00000007682  | 30.15666667 | 101.38      | 0.297462 | -1.7492242 | 0.013792 | 1.860377418 |
| PPFIBP1 (2 of 2) | ENSDARG00000100057  | 7.76        | 5.043333333 | 1.538665 | 0.6216791  | 0.005146 | 2.288567717 |
| ppp1r10          | ENSDARG00000032651  | 18.57333333 | 21.48       | 0.86468  | -0.2097612 | 0.014964 | 1.824941555 |
| ppp1r14bb        | ENSDARG00000030161  | 23.2        | 15.99       | 1.450907 | 0.5369549  | 0.024824 | 1.605128661 |
| ppp1r18          | ENSDARG00000071251  | 1.91        | 5.51        | 0.346642 | -1.5284797 | 0.001152 | 2.938442754 |
| ppp1r37          | ENSDARG00000078458  | 5.48        | 8.206666667 | 0.66775  | -0.5826205 | 0.024509 | 1.610679069 |
| ppp1r7           | ENSDARG00000009740  | 70.2        | 48.74       | 1.440295 | 0.5263648  | 0.021746 | 1.662622963 |
| ppp2r2cb         | ENSDARG00000062277  | 4.066666667 | 7.78        | 0.522708 | -0.9359234 | 0.047233 | 1.325756782 |
| ppp2r5cb         | ENSDARG00000031200  | 15.53       | 17.84666667 | 0.870191 | -0.2005968 | 0.004726 | 2.325512272 |
| ppp2r5d          | ENSDARG00000014428  | 10.19       | 16.55       | 0.61571  | -0.6996772 | 0.011446 | 1.941343532 |
| ppp2r5ea         | ENSDARG00000015474  | 12.82333333 | 20.75333333 | 0.617893 | -0.6945717 | 0.019392 | 1.712384714 |
| ppp3cb           | ENSDARG00000025106  | 23.54333333 | 41.82666667 | 0.562879 | -0.8291044 | 0.023264 | 1.633315225 |
| ppp4cb           | ENSDARG00000076439  | 34.9        | 46.51333333 | 0.750322 | -0.4144173 | 0.012943 | 1.887957968 |
| pqlc2            | ENSDARG00000043624  | 12.51666667 | 7.253333333 | 1.725643 | 0.7871344  | 0.022948 | 1.639248679 |
| praf2            | ENSDARG00000032535  | 34.32333333 | 23.87       | 1.437928 | 0.5239911  | 0.027287 | 1.564039894 |
| prcc             | ENSDARG00000063252  | 10.76666667 | 15.64666667 | 0.688112 | -0.5392837 | 0.002561 | 2.591635332 |
| prdm10           | ENSDARG00000104251  | 3.446666667 | 5.013333333 | 0.6875   | -0.5405684 | 0.004148 | 2.382155177 |
| prdm8            | ENSDARG00000025017  | 6.693333333 | 3.346666667 | 2        | 1          | 0.043348 | 1.363035024 |
| prkacaa          | ENSDARG00000100349  | 24.45       | 30.65333333 | 0.797629 | -0.3262095 | 0.022869 | 1.64075648  |
| prkag2a          | ENSDARG00000012625  | 4.96        | 8.096666667 | 0.612598 | -0.706988  | 0.01295  | 1.887725866 |
| prkar2aa         | ENSDARG00000033184  | 28.15666667 | 56.16666667 | 0.501306 | -0.9962376 | 3.79E-05 | 4.421848691 |
| prkcbb           | ENSDARG00000022254  | 1.376666667 | 3.43        | 0.401361 | -1.3170293 | 0.026111 | 1.583181945 |
| prkcea           | ENSDARG00000003008  | 6.916666667 | 10.15       | 0.681445 | -0.5533309 | 0.02501  | 1.601892045 |
| prkcsh           | ENSDARG00000004470  | 47.81666667 | 40.02333333 | 1.19472  | 0.2566722  | 0.025827 | 1.587917748 |
| prkx             | ENSDARG00000060716  | 10.67       | 6.536666667 | 1.63233  | 0.7069331  | 0.034722 | 1.459392146 |
| prmt1            | ENSDARG00000010246  | 165.32      | 145.1966667 | 1.138594 | 0.1872529  | 0.035867 | 1.445299078 |
| prmt8b           | ENSDARG00000045760  | 5.82        | 9.19        | 0.633297 | -0.6590457 | 0.031848 | 1.496915893 |
| prnprs3          | ENSDARG00000003705  | 18.70333333 | 30.57333333 | 0.611753 | -0.7089784 | 0.02897  | 1.538047845 |

|                  |                    |             |             |          |            |          |             |
|------------------|--------------------|-------------|-------------|----------|------------|----------|-------------|
| prom1a           | ENSDARG00000039966 | 4.15        | 7.51        | 0.552597 | -0.8557016 | 0.042125 | 1.375457561 |
| prph             | ENSDARG00000028306 | 28.62333333 | 12.38333333 | 2.31144  | 1.208792   | 0.000725 | 3.139905266 |
| prph2a           | ENSDARG00000038018 | 9.623333333 | 49.39666667 | 0.194817 | -2.3598051 | 0.004498 | 2.346955751 |
| prph2l           | ENSDARG00000021345 | 1.743333333 | 5.853333333 | 0.297836 | -1.74741   | 0.007578 | 2.120465956 |
| prrc1            | ENSDARG00000044304 | 23.01333333 | 14.93       | 1.541415 | 0.6242558  | 0.000981 | 3.008183758 |
| prrc2a           | ENSDARG00000031494 | 25.42333333 | 31.31333333 | 0.811901 | -0.3006239 | 0.040737 | 1.390013332 |
| prss35           | ENSDARG00000100691 | 51.36       | 27.62666667 | 1.859073 | 0.8945837  | 0.048545 | 1.313852452 |
| prune2           | ENSDARG00000059423 | 12.20666667 | 16.09333333 | 0.758492 | -0.3987939 | 0.037573 | 1.425129137 |
| psap             | ENSDARG00000013968 | 75.67       | 107.7933333 | 0.701991 | -0.5104746 | 0.005789 | 2.237398054 |
| psma2            | ENSDARG00000040121 | 85.53       | 60.38666667 | 1.416372 | 0.5022005  | 0.029281 | 1.533415282 |
| psma6a           | ENSDARG00000019398 | 123.0233333 | 65.16333333 | 1.887923 | 0.9167997  | 0.041837 | 1.378435147 |
| psmc1a           | ENSDARG00000030537 | 87.33       | 59.12       | 1.477165 | 0.5628311  | 0.00565  | 2.247963045 |
| psmc4            | ENSDARG00000027099 | 108.9133333 | 79.8        | 1.364829 | 0.4487199  | 0.030456 | 1.516327733 |
| psmd4a           | ENSDARG00000101295 | 90.04666667 | 59.55       | 1.512119 | 0.5965714  | 0.015472 | 1.81045704  |
| psmd7            | ENSDARG00000102417 | 128.2433333 | 82.42333333 | 1.555911 | 0.6377591  | 0.048986 | 1.309926615 |
| ptenb            | ENSDARG00000056623 | 13.15666667 | 17.02666667 | 0.772709 | -0.372002  | 0.040985 | 1.38737429  |
| ptmaa            | ENSDARG00000021113 | 3057.656667 | 1984.64     | 1.540661 | 0.6235491  | 0.031364 | 1.503565819 |
| ptprna           | ENSDARG00000058646 | 16.11666667 | 23.30666667 | 0.691505 | -0.5321893 | 0.003505 | 2.455305142 |
| pus10            | ENSDARG00000079973 | 3.373333333 | 5.253333333 | 0.642132 | -0.6390582 | 0.043177 | 1.364745538 |
| pvalb6           | ENSDARG00000009311 | 36.00333333 | 91.15       | 0.39499  | -1.3401122 | 0.018443 | 1.734175062 |
| pwp2h            | ENSDARG00000037109 | 10.93666667 | 8.06        | 1.356907 | 0.4403213  | 0.000758 | 3.120420615 |
| pycr1a           | ENSDARG00000102254 | 4.46        | 8.866666667 | 0.503008 | -0.9913481 | 0.012151 | 1.915396127 |
| r3hdm1           | ENSDARG00000101458 | 48.76666667 | 83          | 0.58755  | -0.767216  | 0.029086 | 1.536308819 |
| rab11fip1a       | ENSDARG00000046124 | 4.84        | 2.71        | 1.785978 | 0.8367142  | 0.002519 | 2.598796125 |
| rab2a            | ENSDARG00000020261 | 139.7766667 | 155.3266667 | 0.899888 | -0.152182  | 0.010582 | 1.975414004 |
| rab3c            | ENSDARG00000014462 | 24.54666667 | 36.59333333 | 0.670796 | -0.5760537 | 0.008065 | 2.093371956 |
| rab3gap2         | ENSDARG00000044136 | 3.213333333 | 5.383333333 | 0.596904 | -0.7444291 | 0.02985  | 1.525062086 |
| rab41            | ENSDARG00000029885 | 43.28       | 59.94666667 | 0.721975 | -0.469979  | 0.022474 | 1.648316177 |
| rab6ba           | ENSDARG00000034522 | 21.99       | 38.26       | 0.574752 | -0.7989893 | 0.024039 | 1.619086807 |
| rab6bb           | ENSDARG00000031343 | 32.65       | 70.87       | 0.460703 | -1.1180921 | 0.005708 | 2.243498486 |
| rac3b            | ENSDARG00000020795 | 35.49666667 | 59.82       | 0.593391 | -0.7529444 | 0.025236 | 1.597973732 |
| rad50            | ENSDARG00000038917 | 2.713333333 | 1.906666667 | 1.423077 | 0.5090136  | 0.025494 | 1.593556911 |
| rad51ap1         | ENSDARG00000045853 | 7.346666667 | 3.736666667 | 1.966102 | 0.9753379  | 0.03229  | 1.490927482 |
| RAI1             | ENSDARG00000076679 | 4.433333333 | 8.21        | 0.539992 | -0.8889904 | 0.020658 | 1.684916324 |
| ralgps1          | ENSDARG00000068370 | 2.463333333 | 4.343333333 | 0.567153 | -0.8181908 | 0.029815 | 1.525568772 |
| rangrf           | ENSDARG00000098786 | 9.113333333 | 6.723333333 | 1.355478 | 0.4388022  | 0.026258 | 1.580732513 |
| RAPGEF4 (1 of 2) | ENSDARG00000075924 | 4.723333333 | 8.74        | 0.540427 | -0.8878279 | 0.02112  | 1.675311068 |
| rassf2a          | ENSDARG00000029865 | 17.38666667 | 11.59666667 | 1.499281 | 0.5842712  | 0.023492 | 1.62908601  |
| rassf6           | ENSDARG00000000804 | 11.16       | 7.466666667 | 1.494643 | 0.5798008  | 0.00229  | 2.640091096 |
| rbl2             | ENSDARG00000045636 | 1.896666667 | 4.303333333 | 0.440744 | -1.1819884 | 0.001391 | 2.856647706 |
| rbm12b           | ENSDARG00000079717 | 12.11       | 15.02666667 | 0.805901 | -0.3113262 | 0.040628 | 1.391174191 |
| rbm22            | ENSDARG00000010238 | 20.06333333 | 26.31       | 0.762574 | -0.3910499 | 0.042733 | 1.369237531 |
| rbm39b           | ENSDARG00000041853 | 19.4        | 26.55       | 0.730697 | -0.4526552 | 0.043879 | 1.357742097 |
| rbm6             | ENSDARG00000077060 | 8.35        | 12.12       | 0.688944 | -0.5375416 | 0.047433 | 1.323919927 |
| RBP1 (2 of 2)    | ENSDARG00000038742 | 6.723333333 | 23.43       | 0.286954 | -1.8011084 | 0.043222 | 1.364292612 |
| rbp4l            | ENSDARG00000044684 | 49.02666667 | 134.98      | 0.363214 | -1.4611071 | 0.028413 | 1.546486555 |
| rcan3            | ENSDARG00000032623 | 11.22       | 18.22666667 | 0.615582 | -0.6999781 | 0.048612 | 1.313258787 |
| rccd1            | ENSDARG00000104505 | 11.28333333 | 0.39        | 28.93162 | 4.8545754  | 0.01601  | 1.795618793 |
| rchy1            | ENSDARG00000016710 | 12.64       | 18.65666667 | 0.677506 | -0.5616948 | 0.042532 | 1.371283536 |
| RDH13 (3 of 3)   | ENSDARG00000054797 | 4.626666667 | 12.78333333 | 0.36193  | -1.466219  | 0.020303 | 1.692436772 |
| rdh8a            | ENSDARG00000028048 | 18.52333333 | 44.19       | 0.419175 | -1.2543762 | 0.027603 | 1.559038644 |
| rdh8b            | ENSDARG00000105060 | 2.696666667 | 6.346666667 | 0.424895 | -1.2348219 | 0.030547 | 1.51502965  |
| rfc5             | ENSDARG00000035634 | 36.99       | 25.98666667 | 1.423422 | 0.5093637  | 0.01047  | 1.980041489 |
| rgl1             | ENSDARG00000005989 | 9.67        | 6.006666667 | 1.609878 | 0.6869513  | 0.026887 | 1.570456783 |

|         |                    |             |             |          |            |          |             |
|---------|--------------------|-------------|-------------|----------|------------|----------|-------------|
| rgs20   | ENSDARG00000038859 | 3.273333333 | 10.00333333 | 0.327224 | -1.6116484 | 0.001071 | 2.970359271 |
| rgs7bpa | ENSDARG00000060601 | 9.166666667 | 15.63333333 | 0.586354 | -0.7701563 | 0.032024 | 1.494530478 |
| rgs8    | ENSDARG00000070037 | 18.64333333 | 28.80333333 | 0.647263 | -0.627576  | 0.045433 | 1.34263109  |
| rhbdl3  | ENSDARG00000105190 | 7.223333333 | 5.456666667 | 1.323763 | 0.4046448  | 0.031953 | 1.495489569 |
| rheb    | ENSDARG00000090213 | 23.66       | 34.99666667 | 0.676064 | -0.5647674 | 0.043169 | 1.364828694 |
| ric8a   | ENSDARG00000007247 | 9.356666667 | 17.56666667 | 0.532638 | -0.9087739 | 0.004702 | 2.327714892 |
| rim2a   | ENSDARG00000101606 | 12.63       | 23.88666667 | 0.528747 | -0.9193509 | 0.013939 | 1.85576507  |
| rim2b   | ENSDARG00000102690 | 8.196666667 | 17.16666667 | 0.477476 | -1.0665007 | 0.046817 | 1.329591826 |
| riok1   | ENSDARG00000016399 | 13.64       | 9.493333333 | 1.436798 | 0.522857   | 0.010854 | 1.964394116 |
| rlbp1a  | ENSDARG00000012504 | 42.58333333 | 81.26       | 0.524038 | -0.9322565 | 0.048207 | 1.31689245  |
| r1f     | ENSDARG00000063553 | 3.38        | 4.846666667 | 0.697387 | -0.5199696 | 0.020417 | 1.68999889  |
| rltgr   | ENSDARG00000096533 | 5.85        | 13.55333333 | 0.431628 | -1.2121392 | 0.035226 | 1.453131927 |
| rltpr   | ENSDARG00000056639 | 9.533333333 | 16.40666667 | 0.581065 | -0.7832295 | 0.030401 | 1.517117646 |
| rmnd5b  | ENSDARG00000043359 | 15.84666667 | 18.64666667 | 0.849839 | -0.2347384 | 0.009936 | 2.002779706 |
| rnasekb | ENSDARG00000104458 | 186.6133333 | 280.22      | 0.665953 | -0.5865079 | 0.00791  | 2.101801424 |
| rnd1l   |                    | 17.21666667 | 22.09666667 | 0.779152 | -0.3600229 | 0.003197 | 2.495324776 |
| rnf11a  | ENSDARG00000010442 | 8.436666667 | 10.1        | 0.835314 | -0.2596103 | 0.023823 | 1.622995866 |
| rock2a  | ENSDARG00000017500 | 3.973333333 | 3.023333333 | 1.314223 | 0.3942098  | 0.043189 | 1.364631554 |
| romo1   | ENSDARG00000038076 | 300.3866667 | 224.3333333 | 1.339019 | 0.4211768  | 0.030733 | 1.512394148 |
| roaa    | ENSDARG00000031768 | 6.046666667 | 11.21       | 0.539399 | -0.8905743 | 0.026258 | 1.580733416 |
| rorab   | ENSDARG00000001910 | 24.38333333 | 38.74666667 | 0.629301 | -0.6681768 | 0.022308 | 1.651533871 |
| rorcb   | ENSDARG00000017780 | 2.306666667 | 3.796666667 | 0.60755  | -0.7189238 | 0.037941 | 1.420891766 |
| rp11a   | ENSDARG00000089458 | 1.35        | 2.356666667 | 0.572843 | -0.8037883 | 0.007956 | 2.099291719 |
| rpe     | ENSDARG00000005251 | 25.33333333 | 16.78       | 1.509734 | 0.5942942  | 0.034978 | 1.456201187 |
| rprip1  | ENSDARG00000076055 | 2.076666667 | 4.22        | 0.492101 | -1.0229733 | 0.009989 | 2.000480225 |
| rpia    | ENSDARG00000056640 | 8.546666667 | 12.47666667 | 0.685012 | -0.5457988 | 0.031061 | 1.507780277 |
| rpl11   | ENSDARG00000043509 | 5316.053333 | 3027.506667 | 1.755918 | 0.8122254  | 0.023246 | 1.633648971 |
| rpl12   | ENSDARG00000006691 | 2847.146667 | 2167.37     | 1.313641 | 0.3935714  | 0.000157 | 3.802725711 |
| rpl14   | ENSDARG00000103433 | 1800.653333 | 1450.55     | 1.241359 | 0.3119204  | 0.017789 | 1.749854586 |
| rpl22   | ENSDARG00000070437 | 2117.206667 | 1460.02     | 1.450122 | 0.536174   | 0.003823 | 2.417630996 |
| rpl22l1 | ENSDARG00000010244 | 1410.44     | 740.7166667 | 1.904156 | 0.9291516  | 0.004502 | 2.346563924 |
| rpl23   | ENSDARG00000053457 | 3010.21     | 2221.81     | 1.354846 | 0.4381287  | 0.000976 | 3.010507525 |
| rpl23a  | ENSDARG00000006316 | 3159.723333 | 2468.62     | 1.279955 | 0.3560935  | 0.039729 | 1.400895104 |
| rpl27   | ENSDARG00000015128 | 4384.763333 | 3112.523333 | 1.408749 | 0.4944143  | 0.036946 | 1.43242722  |
| rpl30   | ENSDARG00000035871 | 5562.916667 | 3301.283333 | 1.685077 | 0.7528145  | 0.002599 | 2.585223104 |
| rpl32   | ENSDARG00000054818 | 5860.373333 | 4031.683333 | 1.45358  | 0.5396102  | 0.00197  | 2.705613998 |
| rpl36   | ENSDARG00000100588 | 4082.226667 | 2021.693333 | 2.019212 | 1.0137921  | 0.035166 | 1.453877798 |
| rpl36a  | ENSDARG00000058105 | 2425.053333 | 1843.083333 | 1.315759 | 0.3958952  | 0.012644 | 1.89813098  |
| rpl37   | ENSDARG00000034291 | 5285.37     | 3633.023333 | 1.454813 | 0.5408338  | 0.03003  | 1.52245006  |
| rpl38   | ENSDARG00000006413 | 1354.243333 | 1111.113333 | 1.218817 | 0.285481   | 0.023611 | 1.626879885 |
| rpl5a   | ENSDARG00000020197 | 2798.236667 | 2015.666667 | 1.388244 | 0.4732609  | 0.008386 | 2.076449333 |
| rpl7    | ENSDARG00000007320 | 4269.62     | 2729.576667 | 1.564206 | 0.6454305  | 0.001639 | 2.785300087 |
| rpl9    | ENSDARG00000037350 | 3506.79     | 2232.8      | 1.57058  | 0.651297   | 0.003436 | 2.464005805 |
| rps11   | ENSDARG00000053058 | 2556.776667 | 1644.95     | 1.554319 | 0.6362824  | 0.005857 | 2.232306931 |
| rps15a  | ENSDARG00000010160 | 3658.13     | 2339.123333 | 1.563889 | 0.6451384  | 0.004281 | 2.368492744 |
| rps20   | ENSDARG00000036044 | 7870.7      | 5739.823333 | 1.371244 | 0.4554856  | 0.010007 | 1.999708976 |
| rps24   | ENSDARG00000039347 | 2528.75     | 1469.05     | 1.721351 | 0.7835409  | 0.00069  | 3.160910295 |
| rps27.1 | ENSDARG00000023298 | 5739.846667 | 2693.236667 | 2.131208 | 1.0916712  | 0.00141  | 2.850880422 |
| rps27.2 | ENSDARG00000055475 | 3753.9      | 2290.896667 | 1.638616 | 0.7124778  | 0.005551 | 2.255627627 |
| rps29   | ENSDARG00000041232 | 5933.29     | 4773.236667 | 1.243033 | 0.3138644  | 0.048021 | 1.318571968 |
| rps7    | ENSDARG00000042566 | 4689.72     | 3081.913333 | 1.521691 | 0.6056755  | 0.018503 | 1.732753673 |
| rpz5    | ENSDARG00000075718 | 24.00666667 | 14.69333333 | 1.633848 | 0.7082734  | 0.035909 | 1.444792893 |
| rrad    | ENSDARG00000052011 | 4.306666667 | 8.61        | 0.500194 | -0.9994416 | 0.008038 | 2.094838142 |
| rragca  | ENSDARG00000069829 | 7.9         | 11.80333333 | 0.669302 | -0.5792698 | 0.048583 | 1.31351981  |

|                    |                    |             |             |          |            |          |             |
|--------------------|--------------------|-------------|-------------|----------|------------|----------|-------------|
| rrm2               | ENSDARG00000078069 | 118.26      | 51.29       | 2.305713 | 1.2052127  | 0.023651 | 1.626156941 |
| rrp36              | ENSDARG00000032516 | 4.673333333 | 8.18        | 0.571312 | -0.8076489 | 0.016247 | 1.78923764  |
| rs1a               | ENSDARG00000027236 | 132.84      | 281.3933333 | 0.472079 | -1.0828985 | 0.024837 | 1.604908549 |
| rsl24d1            | ENSDARG00000040439 | 411.3066667 | 259.7266667 | 1.583614 | 0.6632203  | 0.009383 | 2.02766264  |
| rsrp1              | ENSDARG00000030440 | 10.45       | 30.01       | 0.348217 | -1.5219404 | 0.001986 | 2.701935701 |
| rtcb               | ENSDARG00000101047 | 7.386666667 | 12.95666667 | 0.570105 | -0.8106992 | 0.040662 | 1.390813023 |
| rufy2              | ENSDARG00000062019 | 9.38        | 12.07333333 | 0.776919 | -0.3641642 | 0.037574 | 1.42511115  |
| ruvbl1             | ENSDARG00000002591 | 46.45       | 32.03333333 | 1.450052 | 0.5361047  | 0.01265  | 1.897902708 |
| rwdd               | ENSDARG00000068256 | 34.61       | 21.27666667 | 1.626665 | 0.7019168  | 0.01431  | 1.844358454 |
| rwdd1              | ENSDARG00000015930 | 46.15333333 | 41.94       | 1.100461 | 0.138108   | 0.02013  | 1.696159317 |
| rx1                | ENSDARG00000071684 | 16.18333333 | 28.29       | 0.572051 | -0.8057834 | 0.023464 | 1.629591208 |
| sall1a             | ENSDARG00000074319 | 13.49       | 22.53       | 0.598757 | -0.739957  | 0.001703 | 2.768712047 |
| SAMD4B             | ENSDARG00000086735 | 2.66        | 8.71        | 0.305396 | -1.7112465 | 0.04248  | 1.371810718 |
| samsn1b            | ENSDARG00000078647 | 0.98        | 4.253333333 | 0.230408 | -2.1177403 | 0.014891 | 1.827069739 |
| sap18              | ENSDARG00000057854 | 186.6733333 | 147.0033333 | 1.269858 | 0.344667   | 0.031852 | 1.496859765 |
| sars               | ENSDARG00000008237 | 91.74666667 | 72.43       | 1.266694 | 0.3410684  | 0.049494 | 1.305449229 |
| sbds               | ENSDARG00000027803 | 12.24666667 | 16.73       | 0.732018 | -0.4500483 | 0.044863 | 1.348111108 |
| sbf1               | ENSDARG00000062968 | 11.68333333 | 15.47333333 | 0.755062 | -0.4053321 | 0.003703 | 2.431476804 |
| sc:d217            | ENSDARG00000079645 | 8.146666667 | 3.986666667 | 2.043478 | 1.0310269  | 0.03252  | 1.487851585 |
| scamp4             | ENSDARG00000010531 | 6.85        | 4.853333333 | 1.411401 | 0.497128   | 0.011163 | 1.952233794 |
| SCARNA13           | ENSDARG00000083738 | 4.466666667 | 0.73        | 6.118721 | 2.6132302  | 0.00411  | 2.386150048 |
| scg3               | ENSDARG00000086288 | 45.45666667 | 68.96333333 | 0.659143 | -0.6013376 | 0.009478 | 2.023286771 |
| scp2a              | ENSDARG00000012194 | 8.026666667 | 12.17333333 | 0.659365 | -0.6008514 | 0.025394 | 1.59527212  |
| scrn2              | ENSDARG00000043497 | 9.17        | 23.57333333 | 0.388999 | -1.3621621 | 0.004256 | 2.370978988 |
| sd4                | ENSDARG00000059906 | 66.51       | 41.67666667 | 1.595857 | 0.6743314  | 0.016246 | 1.789243152 |
| sdf2l1             | ENSDARG00000035631 | 74.63666667 | 54.78333333 | 1.362397 | 0.4461475  | 0.034561 | 1.461419557 |
| sec11a             | ENSDARG00000008936 | 134.3866667 | 93.65       | 1.434988 | 0.5210391  | 0.033226 | 1.478521412 |
| sec24c             | ENSDARG00000103516 | 7.306666667 | 11.54666667 | 0.632794 | -0.6601911 | 0.027971 | 1.553297708 |
| sec61a1            | ENSDARG00000021669 | 177.9666667 | 127.48      | 1.396036 | 0.4813361  | 0.023864 | 1.622253643 |
| sec61b             | ENSDARG00000076568 | 349.4666667 | 258.1466667 | 1.353752 | 0.4369639  | 0.003149 | 2.501771683 |
| sel1l              | ENSDARG00000004581 | 17.62333333 | 15.05       | 1.170986 | 0.2277233  | 0.014572 | 1.836478067 |
| selt1b             |                    | 33.33666667 | 25.22666667 | 1.321485 | 0.4021603  | 0.002741 | 2.562162821 |
| senp7b             | ENSDARG00000061138 | 2.68        | 4.31        | 0.62181  | -0.6854549 | 0.033502 | 1.474927014 |
| sepn1              | ENSDARG00000033616 | 46.14333333 | 24.25666667 | 1.902295 | 0.9277409  | 0.003725 | 2.428856114 |
| sepw1              | ENSDARG00000035136 | 370.1933333 | 259.2333333 | 1.428031 | 0.5140277  | 0.01944  | 1.711294623 |
| sepw2a             |                    | 155.0133333 | 114.1933333 | 1.357464 | 0.4409139  | 0.032294 | 1.490872681 |
| serp1              | ENSDARG00000099439 | 136.2166667 | 101.9633333 | 1.335938 | 0.4178528  | 0.041508 | 1.381867581 |
| setd2              | ENSDARG00000062244 | 4.816666667 | 6.836666667 | 0.704534 | -0.505258  | 0.039375 | 1.40477918  |
| sez6a              | ENSDARG00000100876 | 2.52        | 5.896666667 | 0.42736  | -1.2264759 | 0.008683 | 2.061329291 |
| sf1                | ENSDARG00000008188 | 39.63666667 | 58.90333333 | 0.67291  | -0.5715136 | 0.048169 | 1.317235073 |
| sf3b5              | ENSDARG00000016855 | 147.27      | 89.64333333 | 1.642844 | 0.7161954  | 0.003303 | 2.48113944  |
| sf3b6              | ENSDARG00000009753 | 195.01      | 109.8766667 | 1.774808 | 0.8276631  | 0.018918 | 1.723130545 |
| sgip1a             | ENSDARG00000097897 | 7.633333333 | 12.53333333 | 0.609043 | -0.7153851 | 0.040037 | 1.397541498 |
| sh3bgrl2           | ENSDARG00000036878 | 8.296666667 | 16.14       | 0.514044 | -0.9600368 | 0.029662 | 1.527806311 |
| sh3bp5b            | ENSDARG00000103978 | 12.79       | 16.76333333 | 0.762975 | -0.3902928 | 0.018835 | 1.725038737 |
| sh3gl2             | ENSDARG00000023600 | 22.65       | 41.17666667 | 0.550069 | -0.862316  | 0.047676 | 1.321695702 |
| sh3kbp1            | ENSDARG00000075853 | 3.483333333 | 6.026666667 | 0.577987 | -0.7908917 | 0.03388  | 1.470052201 |
| shha               | ENSDARG00000068567 | 14.94333333 | 13.08333333 | 1.142166 | 0.1917718  | 0.013429 | 1.871948985 |
| shmt1              | ENSDARG00000052816 | 21.94333333 | 18.00666667 | 1.218623 | 0.2852516  | 0.029246 | 1.533935685 |
| shroom4            | ENSDARG00000079900 | 5.526666667 | 3.543333333 | 1.559737 | 0.6413024  | 0.014438 | 1.84048827  |
| si:busm1-234g15.3  | ENSDARG00000098051 | 0.34        | 2.28        | 0.149123 | -2.7454272 | 0.007413 | 2.129984068 |
| si:cabz01016011.1  | ENSDARG00000098459 | 0.74        | 4.823333333 | 0.153421 | -2.7044333 | 0.034169 | 1.466368826 |
| si:ch1073-147e4.1  | ENSDARG00000096978 | 5.373333333 | 2.476666667 | 2.169583 | 1.1174176  | 0.03069  | 1.513002338 |
| si:ch1073-174d20.1 | ENSDARG00000079651 | 7.753333333 | 8.806666667 | 0.880394 | -0.1837794 | 0.038831 | 1.410822113 |

|                    |                    |             |             |          |            |          |             |
|--------------------|--------------------|-------------|-------------|----------|------------|----------|-------------|
| si:ch1073-190k2.1  | ENSDARG00000097973 | 23.41       | 4.363333333 | 5.365164 | 2.4236223  | 9.30E-05 | 4.031464399 |
| si:ch1073-235i16.2 | ENSDARG00000097189 | 2.616666667 | 1.14        | 2.295322 | 1.1986963  | 0.012648 | 1.897975777 |
| si:ch1073-303d10.1 | ENSDARG00000103006 | 1.526666667 | 7.463333333 | 0.204556 | -2.289435  | 0.044424 | 1.352385944 |
| si:ch1073-303k11.2 | ENSDARG00000088247 | 15.05666667 | 11.59666667 | 1.298362 | 0.3766922  | 0.014805 | 1.829599812 |
| si:ch1073-322p19.1 | ENSDARG00000075173 | 5.593333333 | 9.423333333 | 0.593562 | -0.7525292 | 0.01626  | 1.788866945 |
| si:ch1073-385i9.2  | ENSDARG00000063300 | 2.913333333 | 5.263333333 | 0.553515 | -0.853306  | 0.048965 | 1.310111128 |
| si:ch1073-39g8.1   | ENSDARG00000096174 | 2.323333333 | 0.353333333 | 6.575472 | 2.7170944  | 0.006111 | 2.213919367 |
| si:ch1073-469d17.2 | ENSDARG00000101485 | 9.453333333 | 32.26       | 0.293036 | -1.7708514 | 0.001086 | 2.964074224 |
| si:ch211-105c13.3  | ENSDARG00000089441 | 108.2033333 | 27.26       | 3.969308 | 1.9888875  | 0.017599 | 1.754511158 |
| si:ch211-106m9.2   | ENSDARG00000105163 | 1.413333333 | 8.506666667 | 0.166144 | -2.5894922 | 0.014222 | 1.847024314 |
| si:ch211-107p11.3  | ENSDARG00000103000 | 16.73       | 9.916666667 | 1.687059 | 0.7545103  | 0.047878 | 1.319859665 |
| si:ch211-113g11.6  | ENSDARG00000070442 | 6.713333333 | 9.966666667 | 0.673579 | -0.5700818 | 0.031917 | 1.495976872 |
| si:ch211-114l13.11 | ENSDARG00000092358 | 0.046666667 | 12.63       | 0.003695 | -8.0802465 | 0.005666 | 2.24675543  |
| si:ch211-114n24.7  |                    | 7.65        | 10.76333333 | 0.710746 | -0.4925933 | 0.033478 | 1.475234364 |
| si:ch211-117c9.5   | ENSDARG00000071235 | 12.30666667 | 17.75666667 | 0.693073 | -0.5289207 | 0.034304 | 1.464653255 |
| si:ch211-119e14.1  | ENSDARG00000099518 | 2.503333333 | 1.126666667 | 2.221893 | 1.1517897  | 0.006761 | 2.16998458  |
| si:ch211-11k18.4   | ENSDARG00000087869 | 29.29       | 21.76666667 | 1.345636 | 0.4282877  | 0.03902  | 1.40870758  |
| si:ch211-12c3.3    | ENSDARG00000104154 | 2.933333333 | 4.62        | 0.634921 | -0.6553518 | 0.036991 | 1.431898299 |
| si:ch211-132g1.3   | ENSDARG00000089477 | 8.036666667 | 12.02       | 0.668608 | -0.5807677 | 0.011125 | 1.953691438 |
| si:ch211-145b13.6  | ENSDARG00000069998 | 3.47        | 1.42        | 2.443662 | 1.2890447  | 0.003004 | 2.52228572  |
| si:ch211-147a11.3  | ENSDARG00000069009 | 18.87       | 13.59333333 | 1.38818  | 0.4731951  | 0.007485 | 2.125826916 |
| si:ch211-150o23.3  | ENSDARG00000078502 | 11.75666667 | 9.763333333 | 1.204165 | 0.2680334  | 0.027572 | 1.559525618 |
| si:ch211-152c2.3   | ENSDARG00000045898 | 35.27333333 | 18.90333333 | 1.865985 | 0.8999373  | 0.035643 | 1.448021052 |
| si:ch211-160d14.9  | ENSDARG00000096599 | 3.18        | 0.42        | 7.571429 | 2.9205655  | 0.003922 | 2.406509281 |
| si:ch211-167m1.5   | ENSDARG00000097670 | 1.103333333 | 4.246666667 | 0.259812 | -1.9444622 | 0.037528 | 1.42564669  |
| si:ch211-175f12.2  | ENSDARG00000095831 | 1.476666667 | 4.323333333 | 0.341557 | -1.5497999 | 0.001028 | 2.988035174 |
| si:ch211-195b15.8  | ENSDARG00000094836 | 15.71333333 | 21.01       | 0.747898 | -0.4190869 | 0.002511 | 2.60007529  |
| si:ch211-198p11.6  | ENSDARG00000097765 | 8.103333333 | 4.86        | 1.667353 | 0.7375592  | 0.025753 | 1.589176052 |
| si:ch211-202a12.4  | ENSDARG00000002369 | 325.8833333 | 191.9966667 | 1.697338 | 0.7632743  | 0.017483 | 1.757379658 |
| si:ch211-202e12.3  | ENSDARG00000095715 | 44.17666667 | 29.87333333 | 1.478799 | 0.5644263  | 0.0366   | 1.436513182 |
| si:ch211-207l14.1  | ENSDARG00000098376 | 9.073333333 | 26.03       | 0.348572 | -1.5204707 | 0.048309 | 1.315974247 |
| si:ch211-209a2.1   | ENSDARG00000094097 | 19.87666667 | 8.646666667 | 2.298766 | 1.2008599  | 0.003168 | 2.499195034 |
| si:ch211-210c8.6   | ENSDARG00000017811 | 8.816666667 | 7.11        | 1.240038 | 0.3103838  | 0.032607 | 1.48668879  |
| si:ch211-221g5.2   | ENSDARG00000095646 | 2.993333333 | 0.213333333 | 14.03125 | 3.8105716  | 0.043193 | 1.364582712 |
| si:ch211-223a21.1  | ENSDARG00000098892 | 0.52        | 4.936666667 | 0.105334 | -3.2469537 | 0.046274 | 1.334664401 |
| si:ch211-229l10.12 | ENSDARG00000101760 | 11.18       | 0.733333333 | 15.24545 | 3.9303073  | 0.048741 | 1.312109788 |
| si:ch211-232m10.6  | ENSDARG00000070931 | 0.996666667 | 5.08        | 0.196194 | -2.3496455 | 0.001441 | 2.841239712 |
| si:ch211-233a24.2  | ENSDARG00000062330 | 2.856666667 | 4.45        | 0.641948 | -0.6394726 | 0.004653 | 2.332226954 |
| si:ch211-235i11.4  | ENSDARG00000088298 | 2.52        | 3.72        | 0.677419 | -0.5618789 | 0.024689 | 1.607495698 |
| si:ch211-236d3.4   | ENSDARG00000086300 | 2.11        | 0.806666667 | 2.615702 | 1.3871985  | 0.03009  | 1.521583679 |
| si:ch211-239d6.4   | ENSDARG00000100012 | 13.37666667 | 28.02       | 0.477397 | -1.0667383 | 0.030831 | 1.511016059 |
| si:ch211-241e1.5   | ENSDARG00000008906 | 2.92        | 2.11        | 1.383886 | 0.4687254  | 0.025271 | 1.597382797 |
| si:ch211-244c8.4   | ENSDARG00000103071 | 12.87333333 | 19.58666667 | 0.65725  | -0.6054862 | 0.015446 | 1.811192412 |
| si:ch211-248g18.6  | ENSDARG00000097211 | 17.49666667 | 9.693333333 | 1.805021 | 0.8520153  | 0.044028 | 1.356272701 |
| si:ch211-254n4.3   | ENSDARG00000020292 | 6.356666667 | 11.68333333 | 0.54408  | -0.8781096 | 0.00585  | 2.232837477 |
| si:ch211-259g3.4   | ENSDARG00000030945 | 2.396666667 | 2.973333333 | 0.806054 | -0.3110519 | 0.040272 | 1.394998519 |
| si:ch211-260e23.9  | ENSDARG00000102572 | 70.32       | 44.36333333 | 1.585093 | 0.6645673  | 0.021532 | 1.666922669 |
| si:ch211-265m20.8  | ENSDARG00000093535 | 6.543333333 | 2.473333333 | 2.645553 | 1.4035691  | 0.027979 | 1.553165747 |
| si:ch211-274k16.4  | ENSDARG00000095786 | 1.016666667 | 2.1         | 0.484127 | -1.0465426 | 0.010235 | 1.989931668 |
| si:ch211-286b5.5   | ENSDARG00000096661 | 67.06       | 45.40666667 | 1.476876 | 0.5625484  | 0.026836 | 1.571277507 |
| si:ch211-30g3.8    | ENSDARG00000099019 | 0.826666667 | 4.593333333 | 0.179971 | -2.4741639 | 0.021361 | 1.670376928 |
| si:ch211-3o3.9     | ENSDARG00000097855 | 1.933333333 | 4.42        | 0.437406 | -1.192956  | 0.005883 | 2.230418818 |
| si:ch211-5k11.2    | ENSDARG00000088330 | 31.76       | 82.42       | 0.385343 | -1.3757836 | 0.039878 | 1.399262621 |
| si:ch211-63o20.7   | ENSDARG00000042000 | 5.096666667 | 2.016666667 | 2.527273 | 1.3375814  | 0.004787 | 2.319905059 |

|                  |                    |             |             |          |            |          |             |
|------------------|--------------------|-------------|-------------|----------|------------|----------|-------------|
| si:ch73-119p20.1 | ENSDARG00000099257 | 24.02       | 51.79333333 | 0.463766 | -1.1085303 | 0.020267 | 1.693215871 |
| si:ch73-126m5.4  | ENSDARG00000096857 | 5.743333333 | 2.996666667 | 1.916574 | 0.9385297  | 0.047531 | 1.323020268 |
| si:ch73-144d13.4 | ENSDARG00000086223 | 6.836666667 | 12.39666667 | 0.551492 | -0.8585873 | 0.020349 | 1.691465906 |
| si:ch73-166c6.2  | ENSDARG00000098395 | 10.39666667 | 5.07        | 2.050625 | 1.0360634  | 0.021847 | 1.660599659 |
| si:ch73-215f7.1  | ENSDARG00000098512 | 29.64666667 | 8.903333333 | 3.329839 | 1.7354524  | 0.001017 | 2.992507185 |
| si:ch73-21g5.7   | ENSDARG00000093156 | 97.9        | 20.17       | 4.853743 | 2.2790978  | 0.001745 | 2.758147169 |
| si:ch73-21k16.6  | ENSDARG00000096770 | 16.98666667 | 24.48666667 | 0.693711 | -0.5275936 | 0.047494 | 1.323361814 |
| si:ch73-233f7.1  | ENSDARG00000061909 | 6.3         | 11.11666667 | 0.566717 | -0.8193005 | 0.016243 | 1.78933445  |
| si:ch73-234b20.6 | ENSDARG00000092880 | 1.536666667 | 5.6         | 0.274405 | -1.8656226 | 0.036707 | 1.435255529 |
| si:ch73-234i15.7 | ENSDARG00000103059 | 5.336666667 | 1.743333333 | 3.061185 | 1.6140905  | 0.043852 | 1.358009154 |
| si:ch73-23l24.1  | ENSDARG00000096905 | 120.1566667 | 80.77       | 1.48764  | 0.5730253  | 0.031948 | 1.495556436 |
| si:ch73-274k23.3 | ENSDARG00000097279 | 40.05333333 | 96.82       | 0.413689 | -1.2733828 | 0.019462 | 1.710820424 |
| si:ch73-28h20.1  | ENSDARG00000098392 | 25.22       | 44.55       | 0.566105 | -0.8208572 | 0.002897 | 2.53809903  |
| si:ch73-29l19.1  | ENSDARG00000100255 | 5.146666667 | 9.533333333 | 0.53986  | -0.8893424 | 0.017992 | 1.744928874 |
| si:ch73-305o9.3  | ENSDARG00000101501 | 1.17        | 2.49        | 0.46988  | -1.0896372 | 0.020358 | 1.691274902 |
| si:ch73-386o14.1 | ENSDARG00000091917 | 0.866666667 | 3.39        | 0.255654 | -1.9677362 | 0.00785  | 2.105120036 |
| si:ch73-389b16.2 | ENSDARG00000103802 | 3.65        | 8.426666667 | 0.433149 | -1.2070656 | 0.024264 | 1.615035803 |
| si:ch73-44m9.2   | ENSDARG00000094821 | 2.41        | 0.573333333 | 4.203488 | 2.0715871  | 0.014421 | 1.84100433  |
| si:ch73-44m9.3   | ENSDARG00000100357 | 8.03        | 11.60333333 | 0.692043 | -0.5310674 | 0.008119 | 2.090510379 |
| si:dkey-100n10.2 | ENSDARG00000062672 | 1.736666667 | 2.733333333 | 0.635366 | -0.6543405 | 0.040952 | 1.387720915 |
| si:dkey-109j17.5 | ENSDARG00000104891 | 2.393333333 | 3.45        | 0.69372  | -0.527575  | 0.017267 | 1.762778593 |
| si:dkey-111e8.5  | ENSDARG00000093960 | 3.073333333 | 0.243333333 | 12.63014 | 3.6587984  | 0.01877  | 1.726540383 |
| si:dkey-111k8.6  | ENSDARG00000096851 | 8.98        | 4.676666667 | 1.920171 | 0.9412348  | 0.017292 | 1.762156539 |
| si:dkey-121a11.3 | ENSDARG00000071458 | 1.983333333 | 3.513333333 | 0.564516 | -0.8249133 | 0.006376 | 2.195465377 |
| si:dkey-12n3.1   | ENSDARG00000098721 | 0           | 2.223333333 | 0.310238 | -1.6885534 | 0.015451 | 1.811051271 |
| si:dkey-145c18.5 | ENSDARG00000093764 | 3.233333333 | 0.903333333 | 3.579336 | 1.8396919  | 0.01399  | 1.854194924 |
| si:dkey-14d8.23  | ENSDARG00000097507 | 7.703333333 | 2.26        | 3.408555 | 1.7691601  | 0.028211 | 1.549581076 |
| si:dkey-153k10.9 | ENSDARG00000004386 | 11.10333333 | 17.14333333 | 0.647676 | -0.6266548 | 0.046822 | 1.329553559 |
| si:dkey-153m14.1 | ENSDARG00000096403 | 1586.226667 | 6437.856667 | 0.24639  | -2.0209815 | 0.001918 | 2.717101896 |
| si:dkey-165g20.5 | ENSDARG00000094933 | 2.5         | 24.60333333 | 0.101612 | -3.2988538 | 0.039589 | 1.402427456 |
| si:dkey-165n16.1 | ENSDARG00000087048 | 11.02       | 5.43        | 2.029466 | 1.0211001  | 0.018785 | 1.726187409 |
| si:dkey-16n15.3  | ENSDARG00000092373 | 3.116666667 | 1.703333333 | 1.829746 | 0.8716431  | 0.017857 | 1.74820038  |
| si:dkey-177p2.6  | ENSDARG00000042322 | 9.11        | 15.09666667 | 0.603444 | -0.7287071 | 0.040982 | 1.387411093 |
| si:dkey-181d19.3 | ENSDARG00000097761 | 0.556666667 | 3.456666667 | 0.161041 | -2.6344959 | 0.022297 | 1.651757733 |
| si:dkey-182i3.10 | ENSDARG00000096614 | 4.403333333 | 2.793333333 | 1.576372 | 0.6566083  | 0.026365 | 1.578974148 |
| si:dkey-184p9.7  | ENSDARG00000092726 | 4.78        | 2.093333333 | 2.283439 | 1.1912086  | 0.020679 | 1.68447122  |
| si:dkey-187a12.4 | ENSDARG00000091897 | 0.773333333 | 3.633333333 | 0.212844 | -2.2321314 | 0.013209 | 1.879120619 |
| si:dkey-193c22.1 | ENSDARG00000093687 | 4.84        | 7.216666667 | 0.67067  | -0.5763256 | 0.009763 | 2.0104178   |
| si:dkey-193h7.5  | ENSDARG00000092633 | 0.66        | 10.89       | 0.060606 | -4.0443941 | 1.08E-05 | 4.965374115 |
| si:dkey-201g16.1 | ENSDARG00000101292 | 0           | 2.633333333 | 0.275229 | -1.8612937 | 0.016593 | 1.780080815 |
| si:dkey-206f10.1 | ENSDARG00000032838 | 1.363333333 | 4.776666667 | 0.285415 | -1.8088659 | 0.003115 | 2.506520417 |
| si:dkey-21e13.3  | ENSDARG00000096701 | 1.413333333 | 3.093333333 | 0.456897 | -1.1300605 | 0.024592 | 1.609203132 |
| si:dkey-222p3.1  | ENSDARG00000071103 | 4.186666667 | 0.53        | 7.899371 | 2.9817378  | 0.005486 | 2.260737513 |
| si:dkey-224k5.13 | ENSDARG00000105162 | 10.18333333 | 6.573333333 | 1.549189 | 0.6315128  | 0.022602 | 1.645852172 |
| si:dkey-237m9.3  | ENSDARG00000098071 | 24.05       | 86.84       | 0.276946 | -1.8523228 | 0.009238 | 2.034424707 |
| si:dkey-238c7.12 | ENSDARG00000095556 | 335.0866667 | 1203.033333 | 0.278535 | -1.8440704 | 0.048202 | 1.316939341 |
| si:dkey-239h2.3  | ENSDARG00000092033 | 28.29666667 | 10.51666667 | 2.69065  | 1.4279546  | 0.002697 | 2.569160541 |
| si:dkey-23i12.5  | ENSDARG00000103682 | 40.33       | 26.18666667 | 1.540097 | 0.623021   | 0.001928 | 2.714859631 |
| si:dkey-242k1.4  | ENSDARG00000104899 | 0           | 2.71        | 0.269542 | -1.8914192 | 0.016225 | 1.789807508 |
| si:dkey-244a7.1  | ENSDARG00000097368 | 8.583333333 | 2.736666667 | 3.136419 | 1.6491183  | 0.020227 | 1.694077586 |
| si:dkey-253i9.4  | ENSDARG00000061459 | 5.42        | 11.5        | 0.471304 | -1.0852691 | 0.003965 | 2.401777891 |
| si:dkey-270b7.4  | ENSDARG00000100537 | 0.63        | 2.13        | 0.295775 | -1.7574297 | 0.040849 | 1.388813821 |
| si:dkey-285e18.8 | ENSDARG00000090116 | 30.13666667 | 17.99333333 | 1.67488  | 0.7440574  | 0.01301  | 1.885715906 |
| si:dkey-28b4.8   | ENSDARG00000002840 | 27.71666667 | 36          | 0.769907 | -0.3772431 | 0.021007 | 1.677627078 |

|                  |                    |             |             |          |            |          |             |
|------------------|--------------------|-------------|-------------|----------|------------|----------|-------------|
| si:dkey-30c15.10 | ENSDARG00000088130 | 5.36        | 3.636666667 | 1.473877 | 0.5596163  | 0.009437 | 2.025146744 |
| si:dkey-31c13.1  | ENSDARG00000104058 | 14.45333333 | 7.906666667 | 1.827993 | 0.8702607  | 0.049541 | 1.305031789 |
| si:dkey-42i9.4   | ENSDARG00000008049 | 206.8566667 | 85.02333333 | 2.432294 | 1.2827007  | 0.002536 | 2.59588418  |
| si:dkey-45l12.2  | ENSDARG00000097129 | 6.726666667 | 0.64        | 10.51042 | 3.393748   | 0.028979 | 1.537911325 |
| si:dkey-4c15.15  | ENSDARG00000071819 | 0.823333333 | 3.813333333 | 0.215909 | -2.2115041 | 0.043814 | 1.358389234 |
| si:dkey-58f10.7  | ENSDARG00000091972 | 3.14        | 1.053333333 | 2.981013 | 1.5758025  | 0.026125 | 1.582951806 |
| si:dkey-60a16.1  | ENSDARG00000037073 | 5.286666667 | 3.52        | 1.501894 | 0.5867829  | 0.013018 | 1.885443029 |
| si:dkey-61o18.2  | ENSDARG00000096876 | 0.616666667 | 4.28        | 0.144081 | -2.795048  | 0.023506 | 1.628819624 |
| si:dkey-71b5.3   | ENSDARG00000095522 | 0.013333333 | 2.11        | 0.006319 | -7.3060617 | 0.008875 | 2.05182483  |
| si:dkey-71b5.7   | ENSDARG00000080675 | 0.49        | 4.066666667 | 0.120492 | -3.0529931 | 0.011896 | 1.92460058  |
| si:dkey-77f5.3   | ENSDARG00000087331 | 21.08666667 | 12.96       | 1.627058 | 0.7022653  | 0.015983 | 1.796335908 |
| si:dkey-77p23.3  | ENSDARG00000103031 | 2.083333333 | 0           | 3.083333 | 1.6244909  | 0.0023   | 2.638283454 |
| si:dkey-81l17.6  | ENSDARG00000097322 | 36.77666667 | 51.17       | 0.718715 | -0.4765075 | 0.016584 | 1.780316793 |
| si:dkey-9c18.3   | ENSDARG00000096579 | 13.76       | 4.413333333 | 3.117825 | 1.6405398  | 0.030463 | 1.516231924 |
| si:dkeyp-116a7.2 | ENSDARG00000097137 | 21.23       | 61.02333333 | 0.3479   | -1.5232566 | 0.012702 | 1.896119128 |
| si:dkeyp-51b9.3  | ENSDARG00000092379 | 4.756666667 | 1.276666667 | 3.725849 | 1.897569   | 0.038103 | 1.419042898 |
| si:dkeyp-52c3.5  | ENSDARG00000038392 | 2.483333333 | 1.046666667 | 2.372611 | 1.2464759  | 0.013574 | 1.867302409 |
| si:dkeyp-72e1.9  | ENSDARG00000103743 | 1.09        | 3.103333333 | 0.351235 | -1.5094905 | 0.007903 | 2.102185988 |
| si:dkeyp-74f1.2  | ENSDARG00000097512 | 2.313333333 | 4.3         | 0.537984 | -0.8943635 | 0.013043 | 1.884635447 |
| si:dkeyp-79b7.13 | ENSDARG00000102619 | 7.086666667 | 10.42       | 0.680102 | -0.5561762 | 0.033035 | 1.481020818 |
| si:dkeyp-89c11.2 | ENSDARG00000089159 | 3.946666667 | 2.096666667 | 1.882353 | 0.9125372  | 0.017149 | 1.765757246 |
| si:dkeyp-93h6.4  | ENSDARG00000096638 | 0.246666667 | 2.426666667 | 0.101648 | -3.2983413 | 0.034322 | 1.464430676 |
| si:rp71-36d5.4   | ENSDARG00000012581 | 3.776666667 | 6.076666667 | 0.621503 | -0.6861667 | 0.048892 | 1.310763942 |
| si:zfos-128g4.2  | ENSDARG00000098889 | 5.17        | 10.76666667 | 0.480186 | -1.0583355 | 0.014183 | 1.84823237  |
| si:zfos-411a11.3 | ENSDARG00000099299 | 7.22        | 22.01333333 | 0.327983 | -1.6083069 | 0.000455 | 3.342446603 |
| SIKE1            | ENSDARG00000102199 | 17.16       | 13.29333333 | 1.290873 | 0.3683466  | 0.033049 | 1.480842281 |
| sipa1l1          | ENSDARG00000020134 | 2.406666667 | 3.8         | 0.633333 | -0.6589631 | 0.025336 | 1.596254552 |
| six1b            | ENSDARG00000026473 | 8.513333333 | 6.41        | 1.328133 | 0.4093998  | 0.045507 | 1.341920735 |
| six3a            | ENSDARG00000058008 | 29.42333333 | 48.23       | 0.610063 | -0.7129701 | 0.020578 | 1.686604148 |
| six3b            | ENSDARG00000054879 | 37.98       | 65.6        | 0.578963 | -0.7884559 | 0.016495 | 1.782658431 |
| ska1             | ENSDARG00000039354 | 7.24        | 5.536666667 | 1.307646 | 0.386972   | 0.047097 | 1.327002957 |
| SLC16A1 (1 of 2) | ENSDARG00000016963 | 3           | 4.61        | 0.650759 | -0.6198043 | 0.046921 | 1.328629514 |
| slc16a3          | ENSDARG00000045051 | 8.086666667 | 17.02666667 | 0.474941 | -1.074179  | 0.019849 | 1.702254653 |
| slc1a8a          | ENSDARG00000104204 | 1.35        | 4.563333333 | 0.295836 | -1.7571286 | 0.016912 | 1.771810806 |
| slc24a2          | ENSDARG00000042988 | 3.47        | 10.03333333 | 0.345847 | -1.5317934 | 0.026668 | 1.574006191 |
| slc25a12         | ENSDARG00000102362 | 26.82       | 30.73333333 | 0.872668 | -0.196495  | 0.047543 | 1.322914271 |
| slc25a40         | ENSDARG00000015856 | 3.48        | 4.823333333 | 0.721493 | -0.4709432 | 0.043363 | 1.362876029 |
| slc25a43         | ENSDARG00000102048 | 7.713333333 | 5.323333333 | 1.448967 | 0.5350246  | 0.048943 | 1.310312257 |
| slc25a44b        | ENSDARG00000035905 | 4.696666667 | 6.933333333 | 0.677404 | -0.5619119 | 0.007087 | 2.149519031 |
| slc27a1a         | ENSDARG00000006240 | 20.45666667 | 16.80666667 | 1.217176 | 0.2835375  | 0.015937 | 1.797591693 |
| slc2a3a          | ENSDARG00000013295 | 17.41333333 | 30.36333333 | 0.573499 | -0.8021378 | 0.02051  | 1.688033464 |
| slc30a9          | ENSDARG00000057272 | 15.54333333 | 20.47333333 | 0.759199 | -0.3974501 | 0.003357 | 2.474085007 |
| slc35a4          | ENSDARG00000062379 | 3.876666667 | 7.146666667 | 0.542444 | -0.8824538 | 0.035809 | 1.446006143 |
| slc35e1          | ENSDARG00000011945 | 7.94        | 11.24       | 0.706406 | -0.5014311 | 0.030264 | 1.519073887 |
| slc35f2          | ENSDARG00000069745 | 5.1         | 2.766666667 | 1.843373 | 0.8823484  | 0.003213 | 2.493131307 |
| slc37a4b         | ENSDARG00000077180 | 2.42        | 11.96       | 0.202341 | -2.3051384 | 0.002651 | 2.576596174 |
| slc38a2          | ENSDARG00000045886 | 14.55       | 28.87333333 | 0.503925 | -0.9887185 | 0.006781 | 2.168710872 |
| slc38a3b         | ENSDARG00000091061 | 7.396666667 | 4.623333333 | 1.599856 | 0.6779419  | 0.005455 | 2.263240169 |
| slc38a7          | ENSDARG00000012002 | 7.59        | 10          | 0.759    | -0.3978282 | 0.013163 | 1.880630012 |
| slc4a8           | ENSDARG00000015531 | 1.846666667 | 4.38        | 0.421613 | -1.2460074 | 0.040525 | 1.392280928 |
| slc6a17          | ENSDARG00000068787 | 2.636666667 | 16.03       | 0.164483 | -2.6039873 | 0.011446 | 1.941363162 |
| slc7a8b          | ENSDARG00000075831 | 17.53333333 | 25.4        | 0.690289 | -0.5347282 | 0.00463  | 2.334431759 |
| slc9a7           | ENSDARG00000076754 | 7.856666667 | 12.59333333 | 0.623875 | -0.6806709 | 0.027694 | 1.557616544 |
| slc9a8           | ENSDARG00000020699 | 2.413333333 | 6.09        | 0.396278 | -1.335415  | 0.001559 | 2.80706025  |



|                 |                    |             |             |          |            |          |             |
|-----------------|--------------------|-------------|-------------|----------|------------|----------|-------------|
| slco5a1         | ENSDARG00000071685 | 0.936666667 | 4.536666667 | 0.206466 | -2.276025  | 0.004969 | 2.303700325 |
| slirp           | ENSDARG00000097753 | 131.73      | 64.17666667 | 2.052615 | 1.0374632  | 0.012025 | 1.919904991 |
| slitrk2         | ENSDARG00000006636 | 3.373333333 | 7.326666667 | 0.460419 | -1.1189821 | 0.014541 | 1.837399494 |
| slmapb          | ENSDARG00000020764 | 6.756666667 | 12.41       | 0.544453 | -0.8771195 | 0.039223 | 1.406461036 |
| smim12          | ENSDARG00000070358 | 17.80666667 | 20.95333333 | 0.849825 | -0.2347623 | 0.026763 | 1.572472217 |
| smim7           | ENSDARG00000074848 | 14.30666667 | 11.54       | 1.239746 | 0.3100444  | 0.008534 | 2.068855854 |
| smox            | ENSDARG00000036967 | 40.69333333 | 54.51666667 | 0.746438 | -0.4219049 | 0.004783 | 2.320283363 |
| smtnb           | ENSDARG00000059442 | 5.823333333 | 11.78       | 0.494341 | -1.0164224 | 0.011752 | 1.929898862 |
| smtnl1          | ENSDARG00000041257 | 29.39333333 | 12.83666667 | 2.289795 | 1.1952184  | 0.042475 | 1.371869753 |
| smurf1          | ENSDARG00000016086 | 4.156666667 | 6.133333333 | 0.677717 | -0.5612443 | 0.021844 | 1.660659523 |
| smx5            | ENSDARG00000070867 | 155.5966667 | 92.18       | 1.687966 | 0.7552855  | 0.038644 | 1.412913054 |
| snap25b         | ENSDARG00000058117 | 76.50333333 | 206.12      | 0.371159 | -1.42989   | 0.002084 | 2.681101299 |
| snap29          | ENSDARG00000038518 | 7.61        | 9.273333333 | 0.820633 | -0.2851916 | 0.019454 | 1.710982572 |
| snoU85          | ENSDARG00000104320 | 0.446666667 | 3.33        | 0.134134 | -2.8982517 | 0.009244 | 2.034162842 |
| snrnp48         | ENSDARG00000039989 | 9.66        | 7.79        | 1.240051 | 0.3103999  | 0.004289 | 2.367687032 |
| snrpd2          | ENSDARG00000040440 | 332.7233333 | 215.0166667 | 1.54743  | 0.6298746  | 0.0018   | 2.744616554 |
| snrpg           | ENSDARG00000099667 | 374.1566667 | 248.9133333 | 1.50316  | 0.587999   | 0.023054 | 1.637252584 |
| snw1            | ENSDARG00000091563 | 94.49       | 58.68666667 | 1.610076 | 0.6871289  | 0.045615 | 1.34089181  |
| snx25           | ENSDARG00000099545 | 8.233333333 | 13.17333333 | 0.625    | -0.6780719 | 0.018128 | 1.741645734 |
| snx27b          | ENSDARG00000016977 | 5.073333333 | 9.036666667 | 0.561416 | -0.8328568 | 0.046737 | 1.330339326 |
| snx4            | ENSDARG00000022659 | 15.37666667 | 17.31       | 0.888311 | -0.1708629 | 0.041655 | 1.380333606 |
| snx8b           | ENSDARG00000078057 | 3.086666667 | 7.733333333 | 0.399138 | -1.3250407 | 0.02285  | 1.641120924 |
| socs6b          | ENSDARG00000015863 | 5.52        | 8.596666667 | 0.642109 | -0.6391091 | 0.028925 | 1.53873374  |
| SOGA1 (2 of 2)  | ENSDARG00000078244 | 0.336666667 | 2.603333333 | 0.129321 | -2.9509673 | 0.000971 | 3.012640829 |
| sort1b          | ENSDARG00000056252 | 12.68666667 | 8.913333333 | 1.423336 | 0.5092761  | 0.031093 | 1.507342006 |
| sos2            | ENSDARG00000060506 | 3.273333333 | 5.593333333 | 0.585221 | -0.7729478 | 0.025808 | 1.588246681 |
| SOWAHA (2 of 2) | ENSDARG00000079125 | 3.313333333 | 1.856666667 | 1.78456  | 0.8355685  | 0.018338 | 1.736642199 |
| sox13           | ENSDARG00000030297 | 10.62       | 6.623333333 | 1.603422 | 0.6811544  | 0.031852 | 1.496869348 |
| spata20         | ENSDARG00000013880 | 2.09        | 2.95        | 0.708475 | -0.497212  | 0.040198 | 1.395798617 |
| sphk2           | ENSDARG00000069893 | 4.37        | 5.72        | 0.763986 | -0.3883819 | 0.015218 | 1.817645135 |
| SPINK2          | ENSDARG00000102076 | 5.533333333 | 1.94        | 2.852234 | 1.5120922  | 0.016105 | 1.793042473 |
| spire1a         | ENSDARG00000035868 | 5.193333333 | 6.84        | 0.759259 | -0.3973355 | 0.010199 | 1.991448371 |
| spock3          | ENSDARG00000070266 | 52.67666667 | 79.19333333 | 0.665165 | -0.5882149 | 0.01724  | 1.76346638  |
| spop            | ENSDARG00000100519 | 18.7        | 28.45666667 | 0.65714  | -0.6057284 | 0.002118 | 2.67413365  |
| spred1          | ENSDARG00000041449 | 14.50666667 | 22.61666667 | 0.641415 | -0.6406703 | 0.020857 | 1.680739314 |
| spred3          | ENSDARG00000040358 | 6.773333333 | 13.44       | 0.503968 | -0.9885952 | 0.02928  | 1.53342158  |
| spryd4          | ENSDARG00000023309 | 38.11333333 | 23.19333333 | 1.643288 | 0.7165856  | 0.040338 | 1.394289771 |
| spryd7b         | ENSDARG00000069485 | 8.056666667 | 13.47666667 | 0.597823 | -0.7422087 | 0.044262 | 1.353966451 |
| sptssa          | ENSDARG00000071203 | 21.06333333 | 16.12       | 1.306658 | 0.385882   | 0.030271 | 1.518966838 |
| spty2d1         | ENSDARG00000033889 | 29.47       | 19.15666667 | 1.538368 | 0.6214005  | 0.01082  | 1.965761628 |
| srpk1a          | ENSDARG00000073997 | 9.256666667 | 18.22333333 | 0.507957 | -0.9772222 | 0.003617 | 2.441694976 |
| srpk2           | ENSDARG00000029368 | 9.44        | 16.14333333 | 0.584762 | -0.7740797 | 0.005212 | 2.282984124 |
| SRR (1 of 2)    | ENSDARG00000096045 | 12.75       | 5.466666667 | 2.332317 | 1.2217639  | 0.007644 | 2.116680504 |
| srsf1b          | ENSDARG00000017843 | 20.9        | 31.47666667 | 0.663984 | -0.5907798 | 0.025192 | 1.598740004 |
| ss18l2          | ENSDARG00000101085 | 49.09666667 | 31.78       | 1.544892 | 0.627506   | 0.042028 | 1.37645893  |
| ssr4            | ENSDARG00000019444 | 328.01      | 174.8333333 | 1.87613  | 0.9077595  | 0.003101 | 2.50847592  |
| ssu72           | ENSDARG00000031216 | 38.91333333 | 55.71333333 | 0.698456 | -0.5177581 | 0.035717 | 1.447129716 |
| st3gal2         | ENSDARG00000102369 | 8.463333333 | 12.23       | 0.692014 | -0.5311265 | 0.037921 | 1.421118116 |
| st3gal3a        | ENSDARG00000015374 | 3.33        | 7.15        | 0.465734 | -1.1024211 | 0.021939 | 1.658791818 |
| stag2a          | ENSDARG00000011783 | 6.55        | 8.026666667 | 0.81603  | -0.2933061 | 0.048306 | 1.315998453 |
| stag2b          | ENSDARG00000053668 | 15.41333333 | 23.88333333 | 0.645359 | -0.6318253 | 0.006263 | 2.203199407 |
| stard3nl        | ENSDARG00000045421 | 17.49333333 | 12.60666667 | 1.387626 | 0.4726184  | 0.036425 | 1.438602341 |
| stk25b          | ENSDARG00000039022 | 19.23       | 34.49666667 | 0.557445 | -0.8430982 | 0.026526 | 1.57632807  |
| stmn1a          | ENSDARG00000004169 | 219.35      | 126.16      | 1.738665 | 0.7979801  | 0.013165 | 1.880574301 |

|                |                    |             |             |          |            |          |             |
|----------------|--------------------|-------------|-------------|----------|------------|----------|-------------|
| STRADB         | ENSDARG00000088225 | 2.343333333 | 6.216666667 | 0.376944 | -1.407579  | 0.014797 | 1.829817316 |
| stx12l         | ENSDARG00000044605 | 7.376666667 | 13.26666667 | 0.55603  | -0.846765  | 0.045986 | 1.337377616 |
| stx16          | ENSDARG00000003307 | 6.356666667 | 8.916666667 | 0.712897 | -0.488234  | 0.00178  | 2.749582848 |
| stx4           | ENSDARG00000052518 | 27.15666667 | 16.44       | 1.651865 | 0.7240961  | 0.028642 | 1.542991378 |
| stx8           | ENSDARG00000103173 | 4.536666667 | 9.003333333 | 0.503887 | -0.9888266 | 0.000627 | 3.202880771 |
| stxbp1a        | ENSDARG00000001994 | 83.98666667 | 169.8066667 | 0.494602 | -1.0156609 | 0.020672 | 1.684626585 |
| stxbp1b        | ENSDARG00000056036 | 20.98       | 53.46       | 0.392443 | -1.3494452 | 0.005014 | 2.299819066 |
| stxbp6l        | ENSDARG00000028354 | 0.743333333 | 2.25        | 0.33037  | -1.5978438 | 0.001035 | 2.984981771 |
| suco           | ENSDARG00000016532 | 5.426666667 | 8.176666667 | 0.663677 | -0.5914465 | 0.02801  | 1.55267931  |
| supt6h         | ENSDARG00000006524 | 11.17       | 17          | 0.657059 | -0.6059056 | 0.018486 | 1.733146663 |
| SUSD3 (2 of 2) | ENSDARG00000069607 | 0.98        | 4.893333333 | 0.200272 | -2.3199639 | 0.01316  | 1.880749229 |
| susd4          | ENSDARG00000026335 | 3.843333333 | 5.313333333 | 0.723338 | -0.4672591 | 0.012283 | 1.910697446 |
| susd6          | ENSDARG00000030116 | 9.15        | 12.91333333 | 0.70857  | -0.4970178 | 0.02391  | 1.621412521 |
| swap70b        | ENSDARG00000057286 | 6.213333333 | 4.91        | 1.265445 | 0.3396444  | 0.008755 | 2.057761279 |
| sybl1          | ENSDARG00000030775 | 5.96        | 8.81        | 0.676504 | -0.5638297 | 0.025282 | 1.597188354 |
| syk            | ENSDARG00000008186 | 1.583333333 | 2.88        | 0.549769 | -0.8631038 | 0.038595 | 1.413472067 |
| syne1a         | ENSDARG00000009499 | 2.716666667 | 4.026666667 | 0.674669 | -0.5677485 | 0.022632 | 1.645283597 |
| syne1b         | ENSDARG00000063068 | 2.11        | 3.213333333 | 0.656639 | -0.6068276 | 0.008028 | 2.095390184 |
| SYNPR (1 of 2) | ENSDARG00000037587 | 2.666666667 | 5.86        | 0.455063 | -1.1358632 | 0.014315 | 1.844209631 |
| syt10          | ENSDARG00000045750 | 1.68        | 2.803333333 | 0.599287 | -0.7386821 | 0.035175 | 1.453771682 |
| syt5a          | ENSDARG00000037941 | 5.11        | 17.15333333 | 0.297901 | -1.7470938 | 0.015961 | 1.796949877 |
| syt5b          | ENSDARG00000011640 | 65.43666667 | 128.6133333 | 0.508786 | -0.9748691 | 0.009036 | 2.044044813 |
| szrd1          | ENSDARG00000056338 | 19.14666667 | 27.65       | 0.692465 | -0.5301862 | 0.0223   | 1.651686983 |
| tab3           | ENSDARG00000062063 | 7.663333333 | 13.70666667 | 0.559095 | -0.8388338 | 0.020078 | 1.697285839 |
| tacc1          | ENSDARG00000073753 | 5.556666667 | 7.383333333 | 0.752596 | -0.4100526 | 0.047948 | 1.319225343 |
| TACC2          | ENSDARG00000062790 | 17.30333333 | 24.50666667 | 0.706066 | -0.5021243 | 0.001651 | 2.782183064 |
| taf1           | ENSDARG00000035330 | 4.663333333 | 6.88        | 0.67781  | -0.561047  | 0.021872 | 1.660110201 |
| taf10          | ENSDARG00000068641 | 107.6533333 | 73.65666667 | 1.461556 | 0.547505   | 0.022504 | 1.64773389  |
| TAF9           | ENSDARG00000077870 | 29.27666667 | 20.72       | 1.412967 | 0.4987273  | 0.022371 | 1.650324051 |
| tagln          | ENSDARG00000045408 | 2.316666667 | 6.366666667 | 0.363874 | -1.4584878 | 0.04812  | 1.317678206 |
| TARS2          | ENSDARG00000075385 | 7.996666667 | 14.35666667 | 0.557    | -0.8442502 | 0.002676 | 2.57254159  |
| tarsl2         | ENSDARG00000092774 | 12.72       | 22.32       | 0.569892 | -0.8112384 | 0.004885 | 2.311150426 |
| tbc1d24        | ENSDARG00000069339 | 11.32333333 | 20.74       | 0.545966 | -0.8731172 | 0.035383 | 1.451206934 |
| tbc1d25        | ENSDARG00000075333 | 4.583333333 | 6.57        | 0.697615 | -0.5194962 | 0.007923 | 2.101097194 |
| TBC1D8B        | ENSDARG00000062192 | 3.523333333 | 5.266666667 | 0.668987 | -0.5799492 | 0.005993 | 2.222374378 |
| tbcb           | ENSDARG00000068404 | 60.73       | 48.73333333 | 1.24617  | 0.3175005  | 0.020555 | 1.687088393 |
| tbck           | ENSDARG00000013667 | 5.15        | 6.5         | 0.792308 | -0.3358673 | 0.035215 | 1.453268975 |
| tbk1           | ENSDARG00000103095 | 5.326666667 | 9.416666667 | 0.565664 | -0.8219835 | 0.0499   | 1.301899138 |
| tbx2a          | ENSDARG00000018025 | 15.22       | 19.97666667 | 0.761889 | -0.3923475 | 0.044172 | 1.354855238 |
| tcf7l1a        | ENSDARG00000038159 | 6.806666667 | 8.706666667 | 0.781776 | -0.355172  | 0.042643 | 1.370155409 |
| tdp2b          | ENSDARG00000035954 | 7.85        | 4.493333333 | 1.747033 | 0.8049066  | 0.012841 | 1.891414116 |
| TEAD4          |                    | 3.083333333 | 2.24        | 1.376488 | 0.4609921  | 0.049961 | 1.301366809 |
| tefa           | ENSDARG00000039117 | 21.59       | 36.09       | 0.598227 | -0.7412359 | 0.031427 | 1.5026992   |
| ten1           | ENSDARG00000097346 | 13.06       | 7.906666667 | 1.651771 | 0.7240134  | 0.028716 | 1.541878563 |
| tex2           | ENSDARG00000078186 | 1.453333333 | 3.526666667 | 0.412098 | -1.2789396 | 0.003316 | 2.479420398 |
| tex9           | ENSDARG00000010586 | 2.36        | 0.843333333 | 2.798419 | 1.484612   | 0.049471 | 1.305650752 |
| tfap2b         | ENSDARG00000012667 | 46.68333333 | 65.65       | 0.711094 | -0.4918874 | 0.033165 | 1.479325107 |
| tfg            | ENSDARG00000003641 | 34.81333333 | 53.12333333 | 0.65533  | -0.6097057 | 0.030694 | 1.512941932 |
| tfip11         | ENSDARG00000056932 | 12.74333333 | 9.103333333 | 1.399854 | 0.4852759  | 0.007522 | 2.123652564 |
| tfpt           | ENSDARG00000089572 | 9.726666667 | 13.65666667 | 0.712228 | -0.489588  | 0.037109 | 1.430522784 |
| thoc7          | ENSDARG00000015394 | 64.68       | 43.24       | 1.495837 | 0.5809532  | 0.041276 | 1.384298993 |
| tiam1a         | ENSDARG00000078430 | 8.083333333 | 11.37666667 | 0.710519 | -0.4930557 | 0.048662 | 1.312809057 |
| timd4          | ENSDARG00000077257 | 2.346666667 | 1.063333333 | 2.206897 | 1.142019   | 0.041462 | 1.382348039 |
| timm10         | ENSDARG00000069116 | 48.86666667 | 65.73666667 | 0.74337  | -0.4278476 | 0.036022 | 1.443427038 |

|                |                    |             |             |          |            |          |             |
|----------------|--------------------|-------------|-------------|----------|------------|----------|-------------|
| timmm13        | ENSDARG00000058297 | 57.90333333 | 74.39666667 | 0.778305 | -0.3615916 | 0.028475 | 1.545539033 |
| tkfc           | ENSDARG00000062085 | 1.863333333 | 4.42        | 0.421569 | -1.2461606 | 0.031794 | 1.497651787 |
| tkta           | ENSDARG00000029689 | 15.21333333 | 26.92       | 0.565131 | -0.8233421 | 0.00981  | 2.008338675 |
| tma16          | ENSDARG00000008068 | 9.096666667 | 6.383333333 | 1.425065 | 0.511028   | 0.029062 | 1.536667105 |
| TMEM102        | ENSDARG00000087162 | 1.946666667 | 3.646666667 | 0.533821 | -0.9055725 | 0.00021  | 3.67869294  |
| tmem136b       | ENSDARG00000035163 | 5.44        | 11.64       | 0.467354 | -1.0974125 | 0.006977 | 2.156309763 |
| tmem141        | ENSDARG00000101963 | 20.00666667 | 9.016666667 | 2.218854 | 1.1498147  | 0.010151 | 1.993479274 |
| tmem178        | ENSDARG00000020758 | 5.826666667 | 13.65333333 | 0.426758 | -1.2285105 | 0.019762 | 1.704175165 |
| tmem237a       | ENSDARG00000041735 | 7.716666667 | 26.93       | 0.286545 | -1.8031645 | 0.044489 | 1.351750651 |
| tmem240b       | ENSDARG00000090145 | 5.15        | 11.84333333 | 0.434844 | -1.2014309 | 0.008191 | 2.086682297 |
| tmem260        | ENSDARG00000076362 | 2.38        | 3.386666667 | 0.702756 | -0.5089044 | 0.024747 | 1.606482777 |
| tmem59l        | ENSDARG00000003655 | 85.36333333 | 108.2833333 | 0.788333 | -0.3431228 | 0.047161 | 1.326412935 |
| tmem60         | ENSDARG00000021589 | 6.433333333 | 11.31333333 | 0.568651 | -0.8143857 | 0.042016 | 1.37658187  |
| tmem63c        | ENSDARG00000004158 | 3.723333333 | 5.393333333 | 0.690358 | -0.5345824 | 0.043938 | 1.357155219 |
| tmem9b         | ENSDARG00000025693 | 37.84333333 | 50.82333333 | 0.744605 | -0.4254518 | 0.007248 | 2.139811073 |
| tmsb4x         | ENSDARG00000077777 | 6014.103333 | 4882.39     | 1.231795 | 0.3007621  | 0.008916 | 2.049820971 |
| TNFRSF14       |                    | 4.853333333 | 0.01        | 485.3333 | 8.9228321  | 0.002373 | 2.624712182 |
| tnfrsf19       | ENSDARG00000041869 | 6.513333333 | 4.246666667 | 1.533752 | 0.6170652  | 0.023379 | 1.63118063  |
| tnnt3a         | ENSDARG00000030270 | 412.0066667 | 193.98      | 2.123965 | 1.0867598  | 0.001083 | 2.96556589  |
| tnw            | ENSDARG00000024829 | 68.65       | 37.04       | 1.853402 | 0.8901756  | 0.045775 | 1.339370807 |
| tollip         | ENSDARG00000098486 | 15.39       | 20.76333333 | 0.74121  | -0.4320448 | 0.03645  | 1.43830799  |
| tomm40l        | ENSDARG00000036721 | 50.07333333 | 31.97666667 | 1.565933 | 0.6470229  | 0.021705 | 1.663430999 |
| tp53bp1        | ENSDARG00000079000 | 6.543333333 | 10.21666667 | 0.640457 | -0.6428269 | 0.008958 | 2.047784485 |
| tp53bp2a       | ENSDARG00000009136 | 10.61       | 7.39        | 1.435724 | 0.5217784  | 0.036899 | 1.432984182 |
| tpbga          | ENSDARG00000099609 | 3.71        | 1.503333333 | 2.467849 | 1.3032543  | 0.009398 | 2.02698015  |
| tpd52l2a       | ENSDARG00000027154 | 13.90666667 | 30.36       | 0.458059 | -1.1263951 | 0.003652 | 2.437418373 |
| tpk1           | ENSDARG00000038040 | 1.66        | 3.543333333 | 0.468485 | -1.0939239 | 0.046365 | 1.33381311  |
| tra2b          | ENSDARG00000002168 | 24.89333333 | 38.28333333 | 0.650239 | -0.620957  | 0.005403 | 2.26736797  |
| trak2          | ENSDARG00000102471 | 3.48        | 6.49        | 0.53621  | -0.8991312 | 0.009065 | 2.042623002 |
| tram1          | ENSDARG00000019137 | 41.79       | 28.1        | 1.487189 | 0.5725876  | 0.002368 | 2.625614068 |
| trappc13       | ENSDARG00000033768 | 8.67        | 12.87666667 | 0.673311 | -0.5706553 | 0.038062 | 1.419512013 |
| trappc3        | ENSDARG00000045364 | 59.36333333 | 71.38666667 | 0.831575 | -0.2660825 | 0.024697 | 1.607354617 |
| trib2          | ENSDARG00000068179 | 7.173333333 | 12.72333333 | 0.563794 | -0.8267611 | 0.009548 | 2.020082279 |
| TRIL           | ENSDARG00000100791 | 3.966666667 | 2.246666667 | 1.765579 | 0.8201411  | 0.02204  | 1.656795931 |
| trim13         | ENSDARG00000010010 | 10.96666667 | 17.08333333 | 0.641951 | -0.6394644 | 0.025989 | 1.585204094 |
| trim3b         | ENSDARG00000005397 | 11.77       | 18.35666667 | 0.641184 | -0.6411898 | 0.044022 | 1.356331818 |
| trim8a         | ENSDARG00000090512 | 9.613333333 | 12.47333333 | 0.770711 | -0.3757384 | 0.006202 | 2.207449374 |
| trmt10c        | ENSDARG00000041575 | 10.85666667 | 6.55        | 1.657506 | 0.7290144  | 0.034339 | 1.464218429 |
| trmt61b        | ENSDARG00000097465 | 4.663333333 | 3.496666667 | 1.333651 | 0.4153813  | 0.033027 | 1.481128727 |
| trnau1apa      | ENSDARG00000101323 | 10.29333333 | 5.55        | 1.854655 | 0.8911506  | 0.007672 | 2.115094237 |
| trpm7          | ENSDARG00000036232 | 7.61        | 12.58       | 0.604928 | -0.7251636 | 0.009834 | 2.007251966 |
| try            | ENSDARG00000042993 | 1.32        | 4.046666667 | 0.326194 | -1.6161961 | 0.036891 | 1.433082589 |
| tsc22d1        | ENSDARG00000038306 | 73.96       | 100.7633333 | 0.733997 | -0.4461536 | 0.011095 | 1.95486322  |
| TSTD1          | ENSDARG00000071567 | 16.98       | 7.76        | 2.188144 | 1.1297079  | 0.024913 | 1.603579472 |
| TSTD2          | ENSDARG00000098660 | 0.873333333 | 2.1         | 0.415873 | -1.265785  | 0.016254 | 1.789043192 |
| TTBK2 (2 of 2) | ENSDARG00000043026 | 3.493333333 | 6.8         | 0.513725 | -0.9609304 | 0.047022 | 1.327698591 |
| ttc13          | ENSDARG00000063242 | 7.613333333 | 11.34666667 | 0.670975 | -0.5756684 | 0.040234 | 1.395408276 |
| ttc17          | ENSDARG00000044812 | 2.336666667 | 3.936666667 | 0.593565 | -0.7525226 | 0.001666 | 2.778325285 |
| ttc3           | ENSDARG00000086075 | 3.54        | 5.843333333 | 0.605819 | -0.7230422 | 0.047039 | 1.327543846 |
| ttc32          | ENSDARG00000069241 | 41.43333333 | 26.54       | 1.561166 | 0.6426235  | 0.0463   | 1.334423022 |
| ttc7a          | ENSDARG00000074760 | 1.033333333 | 2.636666667 | 0.391909 | -1.3514095 | 0.018858 | 1.724502759 |
| ttc7b          | ENSDARG00000061207 | 6.64        | 10.05666667 | 0.660259 | -0.598897  | 0.021191 | 1.6738491   |
| ttc8           | ENSDARG00000099481 | 0.656666667 | 3.023333333 | 0.2172   | -2.2029069 | 0.035102 | 1.454673129 |
| tti2           | ENSDARG00000073773 | 2.83        | 1.38        | 2.050725 | 1.0361338  | 0.005983 | 2.223058148 |

|                 |                    |             |             |          |            |          |             |
|-----------------|--------------------|-------------|-------------|----------|------------|----------|-------------|
| tuba8l3         | ENSDARG00000070155 | 109.46      | 81.73666667 | 1.339179 | 0.4213484  | 0.010112 | 1.995163713 |
| TULP1 (3 of 3)  | ENSDARG00000100478 | 0.896666667 | 12.37       | 0.072487 | -3.7861299 | 0.022332 | 1.651064375 |
| tulp1a          | ENSDARG00000075295 | 45.45       | 95.21       | 0.477366 | -1.0668328 | 0.036559 | 1.437010326 |
| TULP2           | ENSDARG00000062902 | 10.64666667 | 18.87333333 | 0.564112 | -0.8259474 | 0.022534 | 1.647154512 |
| tulp4b          | ENSDARG00000063056 | 4.083333333 | 7.32        | 0.557832 | -0.8420963 | 0.045371 | 1.343224705 |
| txndc12         | ENSDARG00000038980 | 48.19666667 | 42.05666667 | 1.145994 | 0.1965989  | 0.006097 | 2.214876514 |
| U3              | ENSDARG00000101840 | 30.06666667 | 46.28       | 0.649669 | -0.6222239 | 0.001334 | 2.874868389 |
| uba3            | ENSDARG00000057987 | 22.48       | 28.15666667 | 0.79839  | -0.3248345 | 0.007207 | 2.14222317  |
| ubap2l          | ENSDARG00000063219 | 7.933333333 | 13.33666667 | 0.594851 | -0.7493991 | 0.029017 | 1.537351135 |
| ube2a           | ENSDARG00000098466 | 46.65       | 74.82333333 | 0.623469 | -0.6816112 | 0.003135 | 2.503693291 |
| ube2d3          | ENSDARG00000038473 | 39.06333333 | 60.40333333 | 0.646708 | -0.6288131 | 0.02367  | 1.625807454 |
| ube2d4          | ENSDARG00000015057 | 4.74        | 7.403333333 | 0.640252 | -0.6432879 | 0.008248 | 2.083630433 |
| ube2s           | ENSDARG00000031775 | 28.33666667 | 44.26       | 0.640232 | -0.6433334 | 0.025803 | 1.588335614 |
| ube2t           | ENSDARG00000063285 | 18.10333333 | 10.03333333 | 1.804319 | 0.8514544  | 0.020391 | 1.690562073 |
| ube2v1          | ENSDARG00000041875 | 73.06333333 | 91.15666667 | 0.801514 | -0.3192006 | 0.00804  | 2.094752314 |
| ube3a           | ENSDARG00000055737 | 12.20333333 | 16.27333333 | 0.749898 | -0.4152345 | 0.031308 | 1.504350764 |
| ubl3a           | ENSDARG00000099532 | 26.19       | 39.9        | 0.656391 | -0.6073727 | 0.028329 | 1.547775444 |
| ubl3b           | ENSDARG00000021556 | 23.76       | 41.57       | 0.571566 | -0.8070079 | 0.02169  | 1.66374882  |
| UBL4A           | ENSDARG00000007359 | 46.24333333 | 30.31333333 | 1.525511 | 0.6092929  | 0.002345 | 2.629783594 |
| ubxn7           | ENSDARG00000009436 | 9.646666667 | 13.76       | 0.701066 | -0.512378  | 0.045621 | 1.340833279 |
| uchl3           | ENSDARG00000030177 | 89.11333333 | 64.01666667 | 1.392033 | 0.4771937  | 0.047999 | 1.318767634 |
| uchl5           | ENSDARG00000103404 | 62.79       | 46.55333333 | 1.348776 | 0.4316503  | 0.007277 | 2.13801785  |
| uckl1b          | ENSDARG00000078973 | 2.666666667 | 4.503333333 | 0.592154 | -0.7559558 | 0.009638 | 2.016032129 |
| uggt2           | ENSDARG00000062089 | 10.38       | 7.163333333 | 1.449046 | 0.5351035  | 0.009023 | 2.044652077 |
| UIMC1           | ENSDARG00000091187 | 8.416666667 | 12.21       | 0.689326 | -0.5367423 | 0.017423 | 1.758871149 |
| ulk2            | ENSDARG00000097205 | 5.366666667 | 10.5        | 0.511111 | -0.9682911 | 0.018207 | 1.739764886 |
| unc119b         | ENSDARG00000044362 | 48.74666667 | 67.28666667 | 0.724462 | -0.4650171 | 0.021249 | 1.67266194  |
| UNC13B (2 of 2) | ENSDARG00000099113 | 0.643333333 | 3.216666667 | 0.2      | -2.3219281 | 0.012916 | 1.888883486 |
| unga            | ENSDARG00000042527 | 12.57666667 | 7.043333333 | 1.785613 | 0.8364193  | 0.008745 | 2.058231974 |
| uo:ion006       | ENSDARG00000034321 | 7.346666667 | 19.52333333 | 0.376302 | -1.4100377 | 0.044553 | 1.351121522 |
| upk1a           | ENSDARG00000021866 | 0.85        | 2.006666667 | 0.423588 | -1.2392662 | 0.02796  | 1.553461802 |
| usf1            | ENSDARG00000041689 | 50.66333333 | 36.13       | 1.402251 | 0.4877447  | 0.040944 | 1.387813494 |
| usp12a          | ENSDARG00000078109 | 12.69333333 | 20.74333333 | 0.611924 | -0.7085768 | 0.007781 | 2.108982526 |
| usp7            | ENSDARG00000073710 | 19.6        | 24.44333333 | 0.801855 | -0.3185874 | 0.016708 | 1.777067193 |
| uxt             | ENSDARG00000019339 | 13.81       | 5.443333333 | 2.537048 | 1.343151   | 0.00273  | 2.56377815  |
| vamp1           | ENSDARG00000031283 | 36.47333333 | 71.27666667 | 0.511715 | -0.9665878 | 0.010089 | 1.996137004 |
| vapal           | ENSDARG00000115862 | 43.62333333 | 61.64       | 0.707711 | -0.4987668 | 0.000313 | 3.504699789 |
| vbp1            | ENSDARG00000030241 | 57.44333333 | 80.17       | 0.716519 | -0.480923  | 0.031532 | 1.501254018 |
| vdac1           | ENSDARG00000045132 | 165.5666667 | 257.0833333 | 0.644019 | -0.6348238 | 0.029246 | 1.533932507 |
| vegfaa          | ENSDARG00000103542 | 8.366666667 | 5.573333333 | 1.501196 | 0.5861125  | 0.015098 | 1.821084491 |
| vldlr           | ENSDARG00000006257 | 18.81666667 | 29.78333333 | 0.631785 | -0.6624941 | 0.043943 | 1.357113141 |
| vps11           | ENSDARG00000036338 | 5.596666667 | 8.633333333 | 0.648263 | -0.6253499 | 0.002696 | 2.569234081 |
| vps18           | ENSDARG00000070433 | 12.10333333 | 9.103333333 | 1.32955  | 0.4109376  | 0.033705 | 1.472307352 |
| vps35           | ENSDARG00000008224 | 13.37666667 | 23.92666667 | 0.559069 | -0.8389008 | 0.011225 | 1.94982053  |
| waca            | ENSDARG00000012577 | 21.48       | 26.39333333 | 0.813842 | -0.2971796 | 0.047447 | 1.323790438 |
| wbp2            | ENSDARG00000056605 | 3.856666667 | 10.57       | 0.364869 | -1.454549  | 0.012938 | 1.888142615 |
| wdr11           | ENSDARG00000075245 | 6.553333333 | 9.433333333 | 0.6947   | -0.5255387 | 0.001403 | 2.852922082 |
| wdr12           | ENSDARG00000003287 | 16.40333333 | 11.97666667 | 1.369608 | 0.4537626  | 0.002415 | 2.617070539 |
| wdr13           | ENSDARG00000022974 | 14.28       | 24.72666667 | 0.577514 | -0.7920718 | 0.00012  | 3.922356695 |
| wdr18           | ENSDARG00000041113 | 20.65       | 13.11666667 | 1.574333 | 0.6547406  | 0.040394 | 1.393683598 |
| wdr20a          | ENSDARG00000079220 | 2.61        | 4.346666667 | 0.60046  | -0.7358597 | 0.001107 | 2.955685499 |
| wdr37           | ENSDARG00000074611 | 14.15       | 21.16666667 | 0.668504 | -0.580992  | 0.025238 | 1.597937429 |
| wdr45           | ENSDARG00000090219 | 7.95        | 9.213333333 | 0.86288  | -0.2127683 | 0.021396 | 1.669676697 |
| wdr82           | ENSDARG00000014083 | 43.51       | 34.51333333 | 1.260672 | 0.3341932  | 0.028981 | 1.537883621 |

|              |                    |             |             |          |            |          |             |
|--------------|--------------------|-------------|-------------|----------|------------|----------|-------------|
| wls          | ENSDARG0000009534  | 56.19333333 | 44.09666667 | 1.274322 | 0.3497294  | 0.032196 | 1.492191469 |
| wu:fb92b05   | ENSDARG00000044695 | 7.643333333 | 4.33        | 1.765204 | 0.8198349  | 0.005534 | 2.25692776  |
| wu:fc46h12   | ENSDARG00000104814 | 785.32      | 383.6866667 | 2.046774 | 1.033352   | 0.026054 | 1.584124818 |
| xkr7         | ENSDARG00000026333 | 2.686666667 | 5.293333333 | 0.507557 | -0.9783592 | 0.036258 | 1.4405987   |
| ybx1         | ENSDARG00000004757 | 1301.933333 | 961.33      | 1.354304 | 0.4375519  | 0.049494 | 1.305445514 |
| ypel3        | ENSDARG00000055510 | 18.15333333 | 22.11       | 0.821046 | -0.2844645 | 0.010541 | 1.977112015 |
| ythdc1       | ENSDARG00000051953 | 7.99        | 10.17333333 | 0.785387 | -0.3485251 | 0.017471 | 1.757683182 |
| ythdf1       | ENSDARG00000016447 | 17.74       | 23.73       | 0.747577 | -0.4197061 | 0.021015 | 1.677461879 |
| zbtb11       | ENSDARG00000017886 | 10.16       | 12.38       | 0.820679 | -0.2851109 | 0.045286 | 1.34403919  |
| zc2hc1a      | ENSDARG00000027915 | 20.79666667 | 34.94666667 | 0.595097 | -0.7488025 | 0.038003 | 1.420182581 |
| zcchc10      | ENSDARG00000091092 | 20.72333333 | 13.80666667 | 1.500966 | 0.585891   | 0.012907 | 1.889175744 |
| zcchc24      | ENSDARG00000078026 | 8.643333333 | 6.286666667 | 1.374867 | 0.4592925  | 0.022836 | 1.641378233 |
| zdhhc16a     | ENSDARG00000007808 | 8.28        | 16.76333333 | 0.493935 | -1.0176064 | 0.000503 | 3.298245825 |
| zfand5b      | ENSDARG00000002271 | 36.49666667 | 52.07       | 0.700915 | -0.5126877 | 0.0264   | 1.578395397 |
| ZFOS-932H1.3 | ENSDARG00000098311 | 2.616666667 | 4.043333333 | 0.647156 | -0.627815  | 0.012053 | 1.918914185 |
| ZFP41        | ENSDARG00000101105 | 3.1         | 2.016666667 | 1.53719  | 0.6202956  | 0.02075  | 1.682976024 |
| zfyve9a      | ENSDARG00000101903 | 1.96        | 3.623333333 | 0.540938 | -0.8864639 | 0.034942 | 1.456648208 |
| zgc:101731   | ENSDARG00000040965 | 3.063333333 | 1.87        | 1.638146 | 0.7120641  | 0.002849 | 2.545360492 |
| zgc:109744   | ENSDARG00000070800 | 4.66        | 2.923333333 | 1.594071 | 0.6727156  | 0.001736 | 2.760349915 |
| zgc:109965   | ENSDARG00000012126 | 12.92333333 | 31.37       | 0.411965 | -1.2794073 | 0.043062 | 1.365905902 |
| zgc:110540   | ENSDARG00000054929 | 60.54666667 | 28.85       | 2.098671 | 1.0694762  | 0.009891 | 2.004774818 |
| zgc:112970   | ENSDARG00000098332 | 0.17        | 2.04        | 0.083333 | -3.5849625 | 0.034323 | 1.464413231 |
| zgc:113098   | ENSDARG00000076442 | 1.053333333 | 2.783333333 | 0.378443 | -1.4018516 | 0.004325 | 2.364041889 |
| zgc:113314   | ENSDARG00000069453 | 5.51        | 1           | 5.51     | 2.4620523  | 0.007567 | 2.121104967 |
| zgc:123105   | ENSDARG00000003127 | 23.88       | 36.09       | 0.661679 | -0.5957963 | 0.018446 | 1.734087821 |
| zgc:136971   | ENSDARG00000055970 | 1.776666667 | 3.266666667 | 0.543878 | -0.8786462 | 0.042399 | 1.372646722 |
| zgc:152863   | ENSDARG00000099969 | 3.106666667 | 4.893333333 | 0.634877 | -0.6554501 | 0.047739 | 1.321125924 |
| zgc:153426   | ENSDARG00000104436 | 161.3733333 | 313.7933333 | 0.514266 | -0.9594125 | 0.005907 | 2.228637623 |
| zgc:153675   | ENSDARG00000071555 | 35.70666667 | 16.42       | 2.174584 | 1.1207393  | 0.049197 | 1.308058515 |
| zgc:154093   | ENSDARG00000055897 | 3.243333333 | 8.356666667 | 0.388113 | -1.3654503 | 0.010859 | 1.964211769 |
| zgc:158254   | ENSDARG00000071233 | 2.843333333 | 7.31        | 0.388965 | -1.3622882 | 0.002281 | 2.641785883 |
| zgc:158263   | ENSDARG00000037267 | 4.34        | 1.11        | 3.90991  | 1.9671354  | 0.026245 | 1.580949451 |
| zgc:158463   | ENSDARG00000089382 | 780.4566667 | 4096.353333 | 0.190525 | -2.3919497 | 0.003277 | 2.484459349 |
| zgc:158785   | ENSDARG00000062959 | 1.15        | 2.553333333 | 0.450392 | -1.150748  | 0.036696 | 1.435384785 |
| zgc:162356   | ENSDARG00000042620 | 37.17       | 18.91666667 | 1.964934 | 0.9744808  | 0.007293 | 2.137112867 |
| zgc:162509   | ENSDARG00000070604 | 2.446666667 | 0.2         | 12.23333 | 3.6127457  | 0.003477 | 2.458748461 |
| zgc:163143   | ENSDARG00000076437 | 2.11        | 1.283333333 | 1.644156 | 0.7173471  | 0.009896 | 2.004542819 |
| zgc:171242   | ENSDARG00000078551 | 0.14        | 3.636666667 | 0.038497 | -4.699118  | 0.002307 | 2.636890457 |
| zgc:173994   | ENSDARG00000029473 | 1.333333333 | 5.17        | 0.257898 | -1.9551268 | 0.00017  | 3.770502191 |
| zgc:174263   | ENSDARG00000097244 | 7.64        | 5.933333333 | 1.28764  | 0.3647298  | 0.049323 | 1.306952441 |
| zgc:174648   | ENSDARG00000100961 | 6.296666667 | 3.703333333 | 1.70027  | 0.7657639  | 0.022164 | 1.654344793 |
| zgc:174906   | ENSDARG00000075314 | 31.1        | 18.65333333 | 1.667262 | 0.7374811  | 0.007812 | 2.10725514  |
| zgc:193593   | ENSDARG00000078130 | 3.546666667 | 18.72333333 | 0.189425 | -2.4003017 | 0.007473 | 2.126532588 |
| zgc:194207   | ENSDARG00000097799 | 19.06       | 6.533333333 | 2.917347 | 1.544657   | 0.008857 | 2.052726871 |
| zgc:63587    | ENSDARG00000017140 | 41.23333333 | 27.42       | 1.503769 | 0.5885825  | 0.023672 | 1.62575714  |
| zgc:64189    | ENSDARG00000033501 | 0.883333333 | 3.58        | 0.246741 | -2.0189297 | 0.036185 | 1.441471246 |
| zgc:64201    | ENSDARG00000101636 | 0.763333333 | 2.26        | 0.337758 | -1.5659377 | 0.028193 | 1.549856141 |
| zgc:66475    | ENSDARG00000099519 | 9.446666667 | 6.516666667 | 1.449616 | 0.5356712  | 0.029599 | 1.528726474 |
| zgc:77158    | ENSDARG00000013784 | 3.81        | 2.133333333 | 1.785938 | 0.8366816  | 0.041115 | 1.386000248 |
| zgc:77816    | ENSDARG00000011376 | 3.94        | 2.47        | 1.595142 | 0.6736846  | 0.016291 | 1.788043101 |
| zgc:91860    | ENSDARG00000041599 | 16.06       | 28.47333333 | 0.564037 | -0.8261395 | 0.01194  | 1.922983484 |
| zgc:92107    | ENSDARG00000044874 | 7.473333333 | 5.62        | 1.329775 | 0.4111817  | 0.042008 | 1.37666731  |
| zgc:92664    | ENSDARG00000015161 | 63.64333333 | 38.28666667 | 1.662285 | 0.7331673  | 0.008338 | 2.07894959  |
| zgpap        | ENSDARG00000027403 | 15.55       | 10.86       | 1.43186  | 0.5178905  | 0.043201 | 1.36450479  |

|                 |                    |             |             |          |            |          |             |
|-----------------|--------------------|-------------|-------------|----------|------------|----------|-------------|
| zic4            | ENSDARG00000031307 | 8.09        | 10.49666667 | 0.770721 | -0.3757196 | 0.018734 | 1.727379706 |
| znf330          | ENSDARG00000020494 | 30.26333333 | 20.62       | 1.467669 | 0.5535266  | 0.000727 | 3.138756388 |
| znf410          | ENSDARG00000008218 | 13.25333333 | 17.64333333 | 0.751181 | -0.4127679 | 0.049304 | 1.307115252 |
| znf414          | ENSDARG00000079229 | 19.69666667 | 13.03333333 | 1.511253 | 0.5957454  | 0.000764 | 3.116671524 |
| znf622          | ENSDARG00000014692 | 18.8        | 12.8        | 1.46875  | 0.5545889  | 0.010515 | 1.978210362 |
| ZNF638          | ENSDARG00000104169 | 11.21333333 | 16.67333333 | 0.672531 | -0.5723274 | 0.013118 | 1.882138575 |
| ZNF784 (3 of 6) | ENSDARG00000092327 | 8.93        | 2.393333333 | 3.731198 | 1.8996388  | 0.046569 | 1.331899212 |
| znf839          | ENSDARG00000076988 | 8.896666667 | 13.77       | 0.646091 | -0.6301918 | 0.001818 | 2.740472572 |
| ZNF865 (1 of 2) |                    | 11.98333333 | 16.15       | 0.742002 | -0.4305049 | 0.029424 | 1.531299567 |
| ZNHIT6          | ENSDARG00000095817 | 8.966666667 | 5.353333333 | 1.674969 | 0.7441343  | 0.049997 | 1.301060293 |
| zwilch          | ENSDARG00000057100 | 5.606666667 | 2.953333333 | 1.89842  | 0.9247991  | 0.027435 | 1.561697987 |
