# Supplementary material for: Hnrnpul1 controls transcription, splicing, and modulates skeletal and limb development in vivo
Source: PubMed Central journal article supplement (PMC9073674; doi:10.1093/g3journal/jkac067), 2022-03-23
Supplement: jkac067_supplementary_table_s3.pdf [file jkac067_supplementary_table_s3.pdf]

Blackwell et al., Table S3 IPA pathways

| Symbol  | Entrez Gene Name                                     | Ensembl             | Expr Fold | Expr Log | Expr p-val | Expected | Location  | Type(s)      | Entrez Gene ID for Human | Entrez Gene ID for Mouse | Entrez Gene ID for Rat    |
|---------|------------------------------------------------------|---------------------|-----------|----------|------------|----------|-----------|--------------|--------------------------|--------------------------|---------------------------|
| EIF1AX  | eukaryotic translation initiation factor 1A X-linked | ENSDARG00000057912  | 1.233     | 0.303    | 1.09E-02   |          | Cytoplasm | translation  | 1964                     | 13664                    | 317163                    |
| EIF3B   | eukaryotic translation initiation factor 3 subunit B | ENSDARG00000059654  | 1.36      | 0.444    | 3.02E-03   |          | Cytoplasm | translation  | 8662                     | 27979                    | 288516                    |
| EIF3K   | eukaryotic translation initiation factor 3 subunit K | ENSDARG00000068289  | 1.758     | 0.814    | 2.15E-03   |          | Cytoplasm | translation  | 27335                    | 73830                    | 292762                    |
| FAU     | FAU ubiquitin like and ribosomal protein S30 fusion  | ENSDARG00000043663  | 1.924     | 0.944    | 1.51E-02   |          | Cytoplasm | other        | 2197                     | 14109                    | 29752 687780 100360647    |
| RPL5    | ribosomal protein L5                                 | ENSDARG00000020197  | 1.388     | 0.473    | 8.39E-03   | Up       | Cytoplasm | other        | 6125                     | 100503670                | 81763                     |
| RPL7    | ribosomal protein L7                                 | ENSDARG00000007320  | 1.564     | 0.645    | 1.64E-03   | Up       | Nucleus   | transcriptic | 6129                     | 19989                    | 297755                    |
| RPL9    | ribosomal protein L9                                 | ENSDARG000000037350 | 1.571     | 0.651    | 3.44E-03   | Up       | Nucleus   | other        | 6133                     | 20005                    | 29257 100360449 100364457 |
| RPL11   | ribosomal protein L11                                | ENSDARG00000043509  | 1.756     | 0.812    | 2.32E-02   | Up       | Cytoplasm | other        | 6135                     | 67025                    | 362631                    |
| RPL12   | ribosomal protein L12                                | ENSDARG00000006691  | 1.314     | 0.394    | 1.57E-04   | Up       | Nucleus   | other        | 6136                     | 269261                   | 499782 102555453          |
| RPL14   | ribosomal protein L14                                | ENSDARG00000103433  | 1.241     | 0.312    | 1.78E-02   | Up       | Cytoplasm | other        | 9045                     | 67115                    | 65043                     |
| RPL23   | ribosomal protein L23                                | ENSDARG00000053457  | 1.355     | 0.438    | 9.76E-04   | Up       | Cytoplasm | other        | 9349                     | 65019                    | 29282                     |
| RPL27   | ribosomal protein L27                                | ENSDARG00000015128  | 1.409     | 0.494    | 3.69E-02   | Up       | Cytoplasm | other        | 6155                     | 19942                    | 64306                     |
| RPL30   | ribosomal protein L30                                | ENSDARG000000035871 | 1.685     | 0.753    | 2.60E-03   | Up       | Cytoplasm | other        | 6156                     | 19946                    | 64640 100362027           |
| RPL32   | ribosomal protein L32                                | ENSDARG00000054818  | 1.454     | 0.54     | 1.97E-03   | Up       | Cytoplasm | other        | 6161                     | 621697                   |                           |
| RPL37   | ribosomal protein L37                                | ENSDARG00000034291  | 1.455     | 0.541    | 3.00E-02   | Up       | Cytoplasm | other        | 6167                     | 67281                    | 81770 100360781 100360841 |
| RPL38   | ribosomal protein L38                                | ENSDARG00000006613  | 1.219     | 0.285    | 2.36E-02   | Up       | Cytoplasm | other        | 6169                     | 67671                    |                           |
| Rpl22l1 | ribosomal protein L22 like 1                         | ENSDARG00000010244  | 1.904     | 0.929    | 4.50E-03   | Up       | Other     | other        |                          | 68028                    | 361923                    |
| RPL36A  | ribosomal protein L36a                               | ENSDARG00000058105  | 1.316     | 0.396    | 1.26E-02   | Up       | Cytoplasm | other        | 6173                     |                          | 100912182                 |
| RPS7    | ribosomal protein S7                                 | ENSDARG00000042566  | 1.522     | 0.606    | 1.85E-02   |          | Cytoplasm | other        | 6201                     | 20115                    | 29258 100362830           |
| RPS11   | ribosomal protein S11                                | ENSDARG00000053058  | 1.554     | 0.636    | 5.86E-03   |          | Cytoplasm | other        | 6205                     | 27207                    | 81774                     |
| RPS20   | ribosomal protein S20                                | ENSDARG00000036044  | 1.371     | 0.455    | 1.00E-02   |          | Cytoplasm | other        | 6224                     | 67427                    | 122772                    |
| RPS24   | ribosomal protein S24                                | ENSDARG00000039347  | 1.721     | 0.784    | 6.90E-04   |          | Cytoplasm | other        | 6229                     | 20088                    | 81776                     |
| RPS27   | ribosomal protein S27                                | ENSDARG00000023298  | 2.131     | 1.092    | 1.41E-03   |          | Cytoplasm | other        | 6232                     |                          | 94266                     |
| RPS15A  | ribosomal protein S15a                               | ENSDARG00000010160  | 1.564     | 0.645    | 4.28E-03   |          | Cytoplasm | other        | 6210                     | 267019                   | 117053                    |

Blackwell et al., Table S3 IPA pathways

| Symbol   | Entrez Gene Name       | Ensembl  | Expr Fold Change | Expr Log Ratio | Expr p-value | Expected | Location  | Type(s)   | Entrez Gene ID for Human | Entrez Gene ID for Mouse | Entrez Gene ID for Rat |
|----------|------------------------|----------|------------------|----------------|--------------|----------|-----------|-----------|--------------------------|--------------------------|------------------------|
| ANAPC11  | anaphase promoting c   | ENSDARGI | 1.704            | 0.769          | 6.94E-03     | Down     | Cytoplasm | enzyme    | 51529                    | 66156                    | 498030                 |
| BIRC5    | baculoviral IAP repeat | ENSDARGI | 1.73             | 0.79           | 1.95E-02     | Up       | Cytoplasm | other     | 332                      | 11799                    | 64041                  |
| CDC20    | cell division cycle 20 | ENSDARGI | 1.548            | 0.63           | 4.98E-02     | Down     | Nucleus   | other     | 991                      | 107995                   | 64515                  |
| CENPK    | centromere protein K   | ENSDARGI | 1.702            | 0.767          | 1.58E-02     |          | Nucleus   | other     | 64105                    | 60411                    | 294712                 |
| CCNB1    | cyclin B1              | ENSDARGI | 1.509            | 0.593          | 2.82E-02     | Up       | Cytoplasm | kinase    | 891                      | 268697 434175            | 25203                  |
| CDK1     | cyclin dependent kina  | ENSDARGI | 1.331            | 0.413          | 3.43E-02     | Up       | Nucleus   | kinase    | 983                      | 12534                    | 54237                  |
| PPP1R14I | protein phosphatase 1  | ENSDARGI | 1.451            | 0.537          | 2.48E-02     | Down     | Cytoplasm | phosphata | 26472                    | 18938                    | 259225                 |
| PPP1R7   | protein phosphatase 1  | ENSDARGI | 1.44             | 0.526          | 2.17E-02     | Down     | Nucleus   | phosphata | 5510                     | 66385                    | 301618                 |
| SKA1     | spindle and kinetocho  | ENSDARGI | 1.308            | 0.387          | 4.71E-02     | Down     | Nucleus   | other     | 220134                   | 66468                    | 291441                 |
| ZWILCH   | zwilch kinetochore prc | ENSDARGI | 1.898            | 0.925          | 2.74E-02     | Up       | Nucleus   | other     | 55055                    | 68014                    | 691493                 |

| Symbol  | Entrez Gene Name          | Ensembl  | Expr Fold Change | Expr Log Ratio | Expr p-value | Expected | Location  | Type(s)      | Entrez Gene ID for Human | Entrez Gene ID for Mouse | Entrez Gene ID for Rat |
|---------|---------------------------|----------|------------------|----------------|--------------|----------|-----------|--------------|--------------------------|--------------------------|------------------------|
| ANAPC11 | anaphase promoting c      | ENSDARGI | 1.704            | 0.769          | 6.94E-03     |          | Cytoplasm | enzyme       | 51529                    | 66156                    | 498030                 |
| CDC20   | cell division cycle 20    | ENSDARGI | 1.548            | 0.63           | 4.98E-02     |          | Nucleus   | other        | 991                      | 107995                   | 64515                  |
| DNAJB6  | DnaJ heat shock prote     | ENSDARGI | 1.344            | 0.426          | 8.23E-03     |          | Nucleus   | transcriptio | 10049                    | 23950                    | 362293                 |
| DNAJB12 | DnaJ heat shock prote     | ENSDARGI | 1.306            | 0.385          | 2.26E-02     |          | Cytoplasm | other        | 54788                    | 56709                    | 294513                 |
| DNAJC9  | DnaJ heat shock prote     | ENSDARGI | 1.534            | 0.617          | 4.48E-03     |          | Nucleus   | other        | 23234                    | 108671                   | 364240                 |
| DNAJC16 | DnaJ heat shock prote     | ENSDARGI | 1.607            | 0.684          | 4.39E-02     |          | Other     | other        | 23341                    | 214063                   | 362652                 |
| DNAJC19 | DnaJ heat shock prote     | ENSDARGI | 1.403            | 0.489          | 1.99E-02     |          | Cytoplasm | other        | 131118                   | 67713 100503724          |                        |
| FZR1    | fizzy and cell division c | ENSDARGI | 1.298            | 0.377          | 2.48E-02     |          | Nucleus   | kinase       | 51343                    | 56371                    | 314642                 |
| PSMA2   | proteasome 20S subu       | ENSDARGI | 1.416            | 0.502          | 2.93E-02     |          | Cytoplasm | peptidase    | 5683                     | 19166                    | 29669                  |
| PSMC1   | proteasome 26S subu       | ENSDARGI | 1.477            | 0.563          | 5.65E-03     |          | Nucleus   | peptidase    | 5700                     | 19179                    | 117263                 |
| PSMC4   | proteasome 26S subu       | ENSDARGI | 1.365            | 0.449          | 3.05E-02     |          | Nucleus   | peptidase    | 5704                     | 23996                    | 117262                 |
| PSMD4   | proteasome 26S subu       | ENSDARGI | 1.512            | 0.597          | 1.55E-02     |          | Cytoplasm | other        | 5710                     | 19185                    | 83499                  |
| PSMD7   | proteasome 26S subu       | ENSDARGI | 1.556            | 0.638          | 4.90E-02     |          | Cytoplasm | other        | 5713                     | 17463                    | 307821                 |
| UHL3    | ubiquitin C-terminal h    | ENSDARGI | 1.392            | 0.477          | 4.80E-02     |          | Cytoplasm | peptidase    | 7347                     | 50933                    | 498560                 |
| UHL5    | ubiquitin C-terminal h    | ENSDARGI | 1.349            | 0.432          | 7.28E-03     |          | Cytoplasm | peptidase    | 51377                    | 56207                    | 360853                 |
| UBE2T   | ubiquitin conjugating e   | ENSDARGI | 1.804            | 0.851          | 2.04E-02     |          | Nucleus   | enzyme       | 29089                    | 67196                    | 360847                 |

| Symbol | Entrez Gene Name        | Ensembl  | Expr Fold Change | Expr Log Ratio | Expr p-value | Expected | Location  | Type(s) | Entrez Gene ID for Human | Entrez Gene ID for Mouse | Entrez Gene ID for Rat |        |
|--------|-------------------------|----------|------------------|----------------|--------------|----------|-----------|---------|--------------------------|--------------------------|------------------------|--------|
| CCNB1  | cyclin B1               | ENSDARGI | 1.509            | 0.593          | 2.82E-02     |          | Cytoplasm | kinase  | 891                      | 268697 434175            | 25203                  |        |
| CCNB2  | cyclin B2               | ENSDARGI | 1.416            | 0.502          | 1.10E-02     |          | Cytoplasm | other   | 9133                     |                          | 12442                  | 363088 |
| CDK1   | cyclin dependent kinase | ENSDARGI | 1.331            | 0.413          | 3.43E-02     |          | Nucleus   | kinase  | 983                      |                          | 12534                  | 54237  |
| CDK2   | cyclin dependent kinase | ENSDARGI | 1.502            | 0.586          | 2.63E-02     |          | Nucleus   | kinase  | 1017                     |                          | 12566                  | 362817 |
| CCNE2  | cyclin E2               | ENSDARGI | 1.557            | 0.639          | 1.22E-02     |          | Nucleus   | other   | 9134                     |                          | 12448                  | 362485 |

| Symbol   | Entrez Gene Name       | Ensembl  | Expr Fold Change | Expr Log Ratio | Expr p-value | Expected | Location  | Type(s)     | Entrez Gene ID for Human | Entrez Gene ID for Mouse     | Entrez Gene ID for Rat |
|----------|------------------------|----------|------------------|----------------|--------------|----------|-----------|-------------|--------------------------|------------------------------|------------------------|
| EIF1AX   | eukaryotic translation | ENSDARGI | 1.233            | 0.303          | 1.09E-02     |          | Cytoplasm | translation | 1964                     | 13664                        | 317163                 |
| EIF3B    | eukaryotic translation | ENSDARGI | 1.36             | 0.444          | 3.02E-03     |          | Cytoplasm | translation | 8662                     | 27979                        | 288516                 |
| EIF3K    | eukaryotic translation | ENSDARGI | 1.758            | 0.814          | 2.15E-03     |          | Cytoplasm | translation | 27335                    | 73830                        | 292762                 |
| EIF4EBP1 | eukaryotic translation | ENSDARGI | 1.396            | 0.481          | 1.13E-02     |          | Cytoplasm | translation | 1978                     | 13685                        | 116636                 |
| EIF4EBP2 | eukaryotic translation | ENSDARGI | 1.355            | 0.438          | 1.97E-03     |          | Cytoplasm | translation | 1979                     | 13688                        | 361845                 |
| FAU      | FAU ubiquitin like and | ENSDARGI | 1.924            | 0.944          | 1.51E-02     |          | Cytoplasm | other       | 2197                     | 14109 29752 687780 100360647 |                        |
| RPS7     | ribosomal protein S7   | ENSDARGI | 1.522            | 0.606          | 1.85E-02     |          | Cytoplasm | other       | 6201                     | 20115 29258 100362830        |                        |
| RPS11    | ribosomal protein S11  | ENSDARGI | 1.554            | 0.636          | 5.86E-03     |          | Cytoplasm | other       | 6205                     | 27207                        | 81774                  |
| RPS20    | ribosomal protein S20  | ENSDARGI | 1.371            | 0.455          | 1.00E-02     |          | Cytoplasm | other       | 6224                     | 67427                        | 122772                 |
| RPS24    | ribosomal protein S24  | ENSDARGI | 1.721            | 0.784          | 6.90E-04     |          | Cytoplasm | other       | 6229                     | 20088                        | 81776                  |
| RPS27    | ribosomal protein S27  | ENSDARGI | 2.131            | 1.092          | 1.41E-03     |          | Cytoplasm | other       | 6232                     |                              | 94266                  |
| RPS15A   | ribosomal protein S15  | ENSDARGI | 1.564            | 0.645          | 4.28E-03     |          | Cytoplasm | other       | 6210                     | 267019                       | 117053                 |
